# Supplementary material
Source: Research Square preprint supplement (doi:10.21203/rs.3.rs-8707900/v1)
Supplement: Supplementary file 1 [file 5cf340e0a829297215da1e2c.docx]

Table 1. Demonstrator scenarios and inquiry conditions

Data collected: 06.01.2026

Platform: Chat GPT

| Scenario (user type & interaction motif) | Condition | Prompt | Results |
| --- | --- | --- | --- |
| Scenario 1 (Expert) Physical activity and type 2 diabetes risk across socioeconomic contexts *Effect modification* | A. Baseline additive | “How much does physical activity reduce the risk of type 2 diabetes?” | There’s strong scientific evidence that **being physically active substantially lowers the risk of developing type 2 diabetes** — and the **more you do (up to a healthy limit), the greater the benefit**. Estimates vary depending on the study design and population, but here’s what major research has found:  **📉 How much risk reduction is typical**   - People who are regularly physically active have a **~20–30% lower risk** of developing type 2 diabetes compared with inactive people, even after adjusting for factors like body mass index (BMI). [PubMed](https://pubmed.ncbi.nlm.nih.gov/18803434/?utm_source=chatgpt.com) - Meeting the standard public-health recommendation of **150 minutes per week of moderate-to-vigorous activity** (e.g., brisk walking, cycling) is associated with about a **25–35% reduction in risk**. [OUP Academic](https://academic.oup.com/jcem/article-abstract/104/9/3939/5540926?utm_source=chatgpt.com) - A large umbrella of research suggests **30–60% lower type 2 diabetes risk** in more active individuals overall, depending on activity levels and study design. [NCBI](https://www.ncbi.nlm.nih.gov/books/NBK525161/?utm_source=chatgpt.com) - One meta-analysis found that regular moderate-intensity activity (e.g., brisk walking) was associated with roughly a **31% lower risk** vs. sedentary lifestyles. [PMC](https://pmc.ncbi.nlm.nih.gov/articles/PMC3481723/?utm_source=chatgpt.com)   **🏃‍♂️ Dose-response — more activity, extra benefit**   - Those doing **more than 150 min/week** — up to daily activity — may see even greater risk reductions. For example:   - About **26% lower risk** with ~150 min of moderate activity weekly. [Diabetes.co.uk](https://www.diabetes.co.uk/news/2016/oct/weekly-moderate-exercise-lowers-risk-of-type-2-diabetes-by-26-per-cent%2C-study-finds-92337453.html?utm_source=chatgpt.com)   - Activity around an hour a day (or higher intensities) can be linked with **up to ~40% lower risk** compared with very sedentary lifestyles. [University College London](https://www.ucl.ac.uk/news/2016/oct/some-good-more-better-regular-exercise-can-cut-your-diabetes-risk?utm_source=chatgpt.com)   **🧠 Key takeaways**   - **No single strict “threshold”** — even **small increases in physical activity** (e.g., regular walking) reduce risk compared to doing none. [PubMed](https://pubmed.ncbi.nlm.nih.gov/26092138/?utm_source=chatgpt.com) - Benefits are seen **across ages and body sizes**; active lifestyles improve insulin sensitivity and metabolic health. [PMC](https://pmc.ncbi.nlm.nih.gov/articles/PMC3369127/?utm_source=chatgpt.com) - Physical activity works **independently of weight loss**, though losing excess weight alongside increasing activity offers additional protection. [PMC](https://pmc.ncbi.nlm.nih.gov/articles/PMC3481723/?utm_source=chatgpt.com)   **🧬 Why it matters**  Type 2 diabetes arises when the body can’t manage blood glucose well (insulin resistance). Physical activity improves glucose uptake in muscles, reduces insulin resistance, helps control weight, and improves overall metabolic health — all of which lower the chance of developing diabetes. |
| B. Optimised additive | “How much does physical activity reduce the risk of type 2 diabetes? Explain your reasoning step by step and briefly indicate the kinds of reliable evidence typically used to support such explanations (e.g. clinical guidelines, systematic reviews, or large observational studies).” | Physical activity **substantially reduces the risk of developing type 2 diabetes**, with a *dose-response relationship* (more activity = greater reduction). Here’s a step-by-step explanation with typical magnitudes from reliable evidence and the kinds of studies that support these conclusions:  **🧠 What the Evidence Shows**  **1. Broad Risk Reductions from Physical Activity**  Reliable evidence from **systematic reviews and large observational cohort studies** shows that people who are regularly physically active have **significantly lower risk of developing type 2 diabetes** compared with sedentary people:   - A major **meta-analysis of cohort studies** found that high physical activity was associated with about a **35 %–40 % lower risk** of type 2 diabetes compared with low activity (summary relative risks ~0.65–0.70) after adjusting for confounders. [PubMed+1](https://pubmed.ncbi.nlm.nih.gov/26092138/?utm_source=chatgpt.com) - Another comprehensive meta-analysis translating activity into energy expenditure (MET·h/week) indicated about a **26 % lower risk** for those meeting ~150 min/week of moderate-to-vigorous physical activity compared with inactive individuals. Higher amounts (~300 min/week) were associated with **larger reductions (∼36 %–50 %)**. [PMC](https://pmc.ncbi.nlm.nih.gov/articles/PMC6207340/?utm_source=chatgpt.com)   **Why this matters:** These large cohort studies observe thousands of participants over many years, tracking who develops diabetes and relating that to activity levels while adjusting for factors like age, sex, and BMI.  **2. Evidence from Prevention Trials**  Randomized controlled trials—especially in high-risk groups (e.g., people with impaired glucose tolerance)—provide **causal evidence** of risk reduction:   - Lifestyle interventions that include **≥150 minutes per week of moderate activity** plus dietary changes have lowered the incidence of type 2 diabetes by **up to ~58 %** compared to control groups, such as in the U.S. Diabetes Prevention Program (DPP). [SpringerLink+1](https://ijbnpa.biomedcentral.com/articles/10.1186/1479-5868-11-2?utm_source=chatgpt.com) - Even when focusing on physical activity alone (without weight loss), moderate activity has been shown to **reduce progression to diabetes** in high-risk populations. [PMC](https://pmc.ncbi.nlm.nih.gov/articles/PMC3481723/?utm_source=chatgpt.com)   **Why this matters:** Randomized trials reduce confounding and show that increasing activity *causally* lowers diabetes risk.  **3. Public Health Guidelines**  Clinical practice guidelines and advisory reports synthesize **multiple systematic reviews and trials**:   - The U.S. Physical Activity Guidelines Advisory Committee states that **150–300 min/week of moderate-to-vigorous activity** is associated with about a **25 %–35 % reduction** in type 2 diabetes risk. [OUP Academic](https://academic.oup.com/jcem/article-abstract/104/9/3939/5540926?utm_source=chatgpt.com) - **No minimum threshold** of benefit is identified—meaning even small increases in activity reduce risk, especially in sedentary individuals. [OUP Academic](https://academic.oup.com/jcem/article-abstract/104/9/3939/5540926?utm_source=chatgpt.com)   **📊 Why Physical Activity Reduces Diabetes Risk**  Physical activity influences biological and behavioural pathways that are relevant to diabetes:   - **Improves insulin sensitivity** and glucose uptake by muscles - **Helps regulate body weight** (reducing adiposity can lower diabetes risk) - **Lowers inflammation** and improves lipid profiles and blood pressure - **Enhances cardiorespiratory fitness**, which is linked to metabolic health   These physiological effects are observed consistently in **epidemiological studies, clinical trials**, and mechanistic research.  **Types of Reliable Evidence Typically Used**  Here’s how researchers quantify and support the conclusion:   | **Evidence Type** | **What It Shows** | **Strengths** | | --- | --- | --- | | **Systematic reviews & meta-analyses** | Aggregate results from many studies to estimate overall risk reduction | Broad, high-level evidence with statistical synthesis | | **Large prospective cohort studies** | Follow people over time to observe how activity levels relate to diabetes incidence | Real-world patterns, long follow-up | | **Randomized controlled trials (RCTs)** | Test specific interventions (e.g., exercise programs) and measure diabetes outcomes | Strongest causal inference | | **Clinical guidelines** | Summarize evidence from trials and meta-analyses to provide practical recommendations | Expert consensus for clinical practice |   **Summary Answer (Numbers You Can Use)**   - **~25%–40% lower risk** of developing type 2 diabetes among those meeting general physical activity recommendations (~150 min/week). [PMC+1](https://pmc.ncbi.nlm.nih.gov/articles/PMC6207340/?utm_source=chatgpt.com) - **Up to ~50% or more risk reduction** with higher volumes of activity or in lifestyle programs combining exercise with diet/weight loss. [PMC+1](https://pmc.ncbi.nlm.nih.gov/articles/PMC6207340/?utm_source=chatgpt.com) - Benefits are seen across activity intensities (from walking to vigorous exercise), but larger volumes generally produce greater reductions. [PubMed](https://pubmed.ncbi.nlm.nih.gov/26092138/?utm_source=chatgpt.com) |
| C. Interaction-aware inquiry | “How much does physical activity reduce the risk of type 2 diabetes? Explain how this relationship differs across socioeconomic and healthcare-access contexts. Specify relevant determinant domains, the interaction type (effect modification), the time horizon (short-term vs long-term effects), and evidentiary limits. Provide 3–5 conditional ‘if–then’ statements and key uncertainties.” | Here’s a **structured, evidence-informed synthesis** of how **physical activity (PA) reduces type 2 diabetes (T2D) risk**, how this relationship **varies by socioeconomic and healthcare-access contexts**, and how to think about **determinants, interactions, time horizons, uncertainties, and conditional effects**.  **1) Magnitude of Risk Reduction from Physical Activity**  **Epidemiological evidence consistently shows an inverse relationship between physical activity and the risk of developing T2D in adults:**   - Compared with inactive individuals, those meeting the standard guideline of ~150 min/week of moderate-to-vigorous physical activity (MVPA) have **~26–49% lower risk** of incident T2D. For example, a dose-response meta-analysis found a **26% lower risk** at 150 min/week vs inactive, increasing with higher activity volumes (up to ~53% for much higher PA volumes). [PubMed+1](https://pubmed.ncbi.nlm.nih.gov/27747395/?utm_source=chatgpt.com) - Intervention studies combining increased PA with other lifestyle changes (diet, weight loss) show **~40-60% reductions** in diabetes incidence in high-risk adults over ~3 years. [PubMed+1](https://pubmed.ncbi.nlm.nih.gov/11832527/?utm_source=chatgpt.com) - Different PA domains (leisure, vigorous, light intensity, walking) all show benefits, though with **non-linear dose responses** (steeper gains at low activity levels). [PubMed](https://pubmed.ncbi.nlm.nih.gov/26092138/?utm_source=chatgpt.com)   **Summary:** *Regular PA can roughly halve or nearly halve an individual’s risk of developing T2D compared with being inactive, with stronger relative effects seen in high-risk populations (e.g., prediabetes or obesity) and at moderate or higher intensities.*  **2) Key Determinant Domains and How They Modify the PA–T2D Relationship**  Conceptually, determinants fall into **several domains**:  **A. Individual Behavioral and Biological Determinants**   - **Baseline risk/status:** Obese or prediabetic individuals derive greater absolute risk reductions when increasing PA. [PubMed](https://pubmed.ncbi.nlm.nih.gov/18803434/?utm_source=chatgpt.com) - **Intensity & duration of PA:** More MVPA (and vigorous PA) yields larger relative risk reductions in a dose-response fashion. [SpringerLink](https://bmcmedicine.biomedcentral.com/articles/10.1186/s12916-023-02851-5?utm_source=chatgpt.com) - **Adiposity & metabolic control:** Part of PA’s benefit is mediated through effects on BMI and insulin sensitivity. [SpringerLink](https://bmcmedicine.biomedcentral.com/articles/10.1186/s12916-023-02851-5?utm_source=chatgpt.com)   **B. Social and Environmental Determinants**   - **Socioeconomic status (SES):** SES modifies the association between PA and T2D risk. In a large UK cohort, low MVPA contributed to **greater excess T2D risk in lower-SES individuals** than higher-SES ones (e.g., ~68 vs ~31 cases per 10,000 person-years for low MVPA), indicating *effect modification by SES*. [SpringerLink](https://bmcpublichealth.biomedcentral.com/articles/10.1186/s12889-025-24359-8?utm_source=chatgpt.com) - **Built environment & access:** Walkable neighborhoods, green spaces, and safe infrastructure support active commuting and leisure PA, which are linked to lower T2D incidence. [Diabetes UK](https://www.diabetes.org.uk/sites/default/files/2022-10/Preventing%20type%202%20and%20gestational%20diabetes%20position%20statement%20-%20October%202022.pdf?utm_source=chatgpt.com) - **Cumulative disadvantage:** Lower SES is also associated with higher sedentary behavior and shorter sleep, both of which modulate T2D risk. [SpringerLink](https://bmcpublichealth.biomedcentral.com/articles/10.1186/s12889-025-24359-8?utm_source=chatgpt.com)   **C. Healthcare Access and Programmatic Determinants**   - **Access to preventive care and structured PA programs:** Tailored lifestyle programs (e.g., NHS “Healthier You”) reduce T2D risk by ~30–37% in participants by promoting PA and diet. [The Times](https://www.thetimes.com/uk/healthcare/article/nhs-prevention-scheme-cuts-type-2-diabetes-risk-g5c5jtgm7?utm_source=chatgpt.com) - **Supportive health systems:** Availability of coaching, screening, and follow-up influences uptake and sustained PA behavior changes.   **3) Interaction Type: Effect Modification (Moderation)**  The relationship between physical activity and T2D is **modified** (i.e., its strength or absolute impact differs) across contexts:   - **SES as a modifier:** Low SES **amplifies** the adverse risk from low physical activity and sedentary behavior. [SpringerLink](https://bmcpublichealth.biomedcentral.com/articles/10.1186/s12889-025-24359-8?utm_source=chatgpt.com) - **Baseline risk modifiers:** Obesity and prediabetes amplify absolute benefits from PA, while individuals with low baseline risk show smaller absolute changes. [PubMed](https://pubmed.ncbi.nlm.nih.gov/18803434/?utm_source=chatgpt.com) - These are **effect modifications** — the effect of the same dose of PA on T2D risk changes depending on contextual factors.   **4) Time Horizon: Short- vs Long-Term Effects**  **Short-term (0–3 years):**   - Lifestyle interventions incorporating PA can **substantially lower diabetes incidence** within ~2–3 years, especially in high-risk adults. [PubMed](https://pubmed.ncbi.nlm.nih.gov/11832527/?utm_source=chatgpt.com) - Support programs delivered over months yield measurable risk reductions within program durations. [The Times](https://www.thetimes.com/uk/healthcare/article/nhs-prevention-scheme-cuts-type-2-diabetes-risk-g5c5jtgm7?utm_source=chatgpt.com)   **Long-term (5–10 years and beyond):**   - Prospective cohort studies show sustained inverse associations between habitual PA and incident T2D over ~6–10 years. [SpringerLink](https://bmcpublichealth.biomedcentral.com/articles/10.1186/s12889-025-24359-8?utm_source=chatgpt.com) - Dose–response benefits accumulate over longer durations of sustained activity but may plateau at very high PA doses.   **Mechanistically:** Short-term effects relate to improved glucose metabolism and insulin sensitivity; long-term effects include weight maintenance, reduced adiposity, and sustained cardiometabolic health.  **5) Conditional “If–Then” Statements**  a. **If** an adult increases from being sedentary to meeting at least 150 min/week of MVPA, **then** their relative risk of developing T2D decreases by ~26–49% compared with inactivity. [PubMed+1](https://pubmed.ncbi.nlm.nih.gov/27747395/?utm_source=chatgpt.com)  b. **If** a lifestyle intervention includes structured PA and dietary change for individuals with impaired glucose tolerance, **then** incidence of T2D can be reduced by ~50–60% within ~3 years. [PubMed](https://pubmed.ncbi.nlm.nih.gov/11832527/?utm_source=chatgpt.com)  c. **If** individuals with lower socioeconomic status remain physically inactive, **then** the absolute risk of T2D attributable to low PA will be **higher** than for higher-SES individuals (effect modification). [SpringerLink](https://bmcpublichealth.biomedcentral.com/articles/10.1186/s12889-025-24359-8?utm_source=chatgpt.com)  d. **If** healthcare systems provide accessible PA promotion and structured prevention programs, **then** population-level T2D incidence can be reduced (e.g., NHS prevention scheme ~30–37% reduction among engaged participants). [The Times](https://www.thetimes.com/uk/healthcare/article/nhs-prevention-scheme-cuts-type-2-diabetes-risk-g5c5jtgm7?utm_source=chatgpt.com)  e. **If** built environments lack infrastructure for active travel (walking/cycling), **then** opportunities for moderate PA decline and T2D risk remains elevated, particularly in deprived neighborhoods. [Diabetes UK](https://www.diabetes.org.uk/sites/default/files/2022-10/Preventing%20type%202%20and%20gestational%20diabetes%20position%20statement%20-%20October%202022.pdf?utm_source=chatgpt.com)  **6) Key Uncertainties and Limits of Current Evidence**   - **Causality vs confounding:** Most PA–T2D associations come from observational cohorts; although consistent, residual confounding cannot be fully ruled out. - **Measurement variation:** Self-reported vs device-measured PA differ in precision; under- or over-reporting can bias effect estimates. [SpringerLink](https://bmcmedicine.biomedcentral.com/articles/10.1186/s12916-023-02851-5?utm_source=chatgpt.com) - **Generalizability:** Many trials focus on high-risk or specific populations (e.g., older adults), limiting applicability to broader age, ethnic, and geographic groups. - **Healthcare access gradients:** Evidence on how differential access to preventive care modifies PA benefits across health systems (beyond SES proxies) is limited. - **Sustainability and adherence:** Long-term adherence to increased PA and how this interacts with social supports is under-studied.   **Summary**  Physical activity robustly **reduces type 2 diabetes risk** — often by **~30–60%** — especially when sustained and combined with other lifestyle changes. The benefits are **modified** by socioeconomic conditions, healthcare access, and baseline risk. Understanding these contextual modifiers is critical for tailoring public health strategies and reducing inequities in diabetes prevention. |
| Scenario 2 (Expert) Socioeconomic disadvantage and type 2 diabetes risk *Mediation* | A. Baseline additive | “Why does socioeconomic status affect the risk of type 2 diabetes?” | Socioeconomic status (SES)—things like income, education, occupation, and neighborhood—affects the risk of type 2 diabetes because it shapes **daily exposures, resources, and long-term stress**, all of which influence metabolism and health behaviors. The effect is multifactorial rather than due to a single cause.  Here are the main pathways:  **1. Access to healthy food**   - Lower-SES neighborhoods often have fewer supermarkets and more fast-food outlets (“food deserts” or “food swamps”). - Healthier foods (fresh produce, lean proteins) tend to be more expensive and perishable. - Diets higher in refined carbohydrates, sugar, and ultra-processed foods increase insulin resistance and weight gain.   **2. Opportunities for physical activity**   - Unsafe neighborhoods, lack of parks, or long working hours reduce opportunities for regular exercise. - Physically demanding jobs may still involve prolonged stress without the metabolic benefits of aerobic activity. - Sedentary jobs combined with limited leisure time worsen insulin sensitivity.   **3. Chronic stress and biology**   - Financial insecurity, job instability, discrimination, and housing stress activate stress hormones (especially cortisol). - Chronic cortisol elevation promotes:   - Insulin resistance   - Central (abdominal) fat accumulation   - Inflammation - These changes directly increase diabetes risk, even independent of body weight.   **4. Healthcare access and quality**   - Lower SES is associated with:   - Delayed preventive care and screening   - Less consistent treatment of prediabetes   - Barriers to medications, glucose monitoring, and lifestyle counseling - Diabetes may be diagnosed later, when damage has already occurred.   **5. Education and health literacy**   - Less access to health education can make it harder to:   - Recognize early symptoms   - Understand nutrition labels   - Navigate complex healthcare systems - This affects prevention and self-management.   **6. Early-life and intergenerational effects**   - Poor nutrition or stress during pregnancy and childhood can alter metabolism long-term (fetal programming). - Childhood poverty is linked to higher adult diabetes risk, even if SES improves later. - These effects can persist across generations.   **7. Environmental exposures**   - Lower-income communities may have greater exposure to:   - Air pollution   - Endocrine-disrupting chemicals - These exposures are increasingly linked to insulin resistance and metabolic disease.   **Big picture**  Socioeconomic status affects **choices, constraints, stress physiology, and biology simultaneously**. Type 2 diabetes is not just a “lifestyle disease” but a condition strongly shaped by social and structural factors.  If you’d like, I can also explain:   - Why the SES–diabetes link persists even after adjusting for obesity - How this relationship differs by race/ethnicity - What policies or interventions actually reduce diabetes risk at the population level |
| B. Optimised additive | “Why does socioeconomic status affect the risk of type 2 diabetes? Explain your reasoning step by step and briefly indicate the kinds of reliable evidence typically used to support such explanations (e.g. clinical guidelines, systematic reviews, or large observational studies).” | Socioeconomic status (SES) affects the risk of type 2 diabetes through a set of interconnected pathways. Below is a **step-by-step causal explanation**, followed by the **types of reliable evidence** typically used to support each step.  **Step-by-step reasoning**  **1. SES shapes material living conditions**  People with lower SES often have:   - Limited income - Less stable housing - Fewer local resources (e.g., grocery stores, safe recreational spaces)   **Why this matters:** These conditions constrain daily choices that influence metabolic health.  **Evidence typically used:** Large population-based observational studies linking income, education, or neighborhood deprivation to health outcomes.  **2. SES influences diet quality and energy balance**  Lower SES is associated with:   - Greater reliance on inexpensive, calorie-dense, ultra-processed foods - Lower intake of fruits, vegetables, and whole grains - Higher food insecurity and irregular eating patterns   **Why this matters:** Diets high in refined carbohydrates and saturated fats promote insulin resistance and weight gain—key drivers of type 2 diabetes.  **Evidence typically used:**   - Nutritional epidemiology studies - Systematic reviews of diet patterns and diabetes risk - National dietary surveys linked to SES indicators   **3. SES affects opportunities for physical activity**  Lower-SES environments often involve:   - Fewer safe places to exercise - More sedentary or physically exhausting jobs (which paradoxically reduce leisure-time activity) - Less time flexibility due to multiple jobs or caregiving demands   **Why this matters:** Physical inactivity reduces insulin sensitivity and increases diabetes risk.  **Evidence typically used:** Large cohort studies examining physical activity, neighborhood characteristics, and diabetes incidence.  **4. Chronic psychosocial stress is more common at lower SES**  Lower SES is associated with:   - Financial insecurity - Job instability - Exposure to discrimination or unsafe environments   **Why this matters:** Chronic stress activates hormonal pathways (e.g., cortisol) that promote insulin resistance, abdominal obesity, and inflammation.  **Evidence typically used:**   - Longitudinal studies measuring stress biomarkers - Mechanistic studies linking stress hormones to glucose metabolism - Systematic reviews on stress and metabolic disease   **5. SES influences health behaviors beyond diet and exercise**  Lower SES is linked to higher rates of:   - Smoking - Poor sleep quality - Depression and anxiety   **Why this matters:** These factors independently increase diabetes risk and worsen metabolic control.  **Evidence typically used:** Prospective cohort studies and meta-analyses of behavioral risk factors.  **6. SES affects access to preventive healthcare**  Lower-SES individuals often experience:   - Delayed screening for prediabetes - Less consistent primary care - Barriers to lifestyle counseling or early intervention   **Why this matters:** Type 2 diabetes often develops silently; delayed detection increases progression risk.  **Evidence typically used:** Health services research, registry studies, and clinical guideline evidence on prevention effectiveness.  **7. Risks accumulate across the life course**  Disadvantage often begins early:   - Poor maternal nutrition - Childhood obesity - Limited educational opportunities   **Why this matters:** Early-life metabolic programming and lifelong exposure to risk factors compound diabetes risk.  **Evidence typically used:** Birth cohort studies and life-course epidemiology research.  **Summary**  Socioeconomic status affects type 2 diabetes risk **not because of a single factor**, but because it systematically shapes:   - Living conditions - Health behaviors - Stress exposure - Access to prevention and care   These influences interact over time, producing a strong and consistent social gradient in diabetes risk.  **Types of reliable evidence supporting these explanations**   - **Large observational cohort studies** (e.g., national or international population studies) - **Systematic reviews and meta-analyses** of diet, physical activity, stress, and diabetes risk - **Clinical and public health guidelines** synthesizing epidemiologic and intervention evidence - **Life-course and birth cohort studies** - **Health services and health equity research**   Together, these forms of evidence consistently show that socioeconomic conditions are fundamental drivers of type 2 diabetes risk. |
| C. Interaction-aware inquiry | “Why does socioeconomic status affect the risk of type 2 diabetes? Explain this relationship by explicitly describing mediating pathways, specifying the interaction type (mediation), temporal framing (life-course accumulation), and evidentiary limits. Provide a pathway description using arrows and explain why adjusting for mediators changes interpretation.” | Socioeconomic status (SES) affects the risk of type 2 diabetes (T2D) primarily through **mediating pathways** that operate and accumulate across the **life course**, rather than through a large direct biological effect of SES itself.  **1. Core causal claim**  **Interaction type:** **Mediation** (not effect modification) **Temporal framing:** **Life-course accumulation** (early life → adulthood → later adulthood)  Low SES increases exposure to multiple social, behavioral, psychosocial, and environmental factors over time. These factors, in turn, causally increase insulin resistance and β-cell dysfunction, leading to T2D.  **2. Mediating pathways (with arrows)**  A simplified causal pathway diagram:  Low SES (childhood & adulthood)  ↓  Material deprivation / constrained choices  ↓  ---------------------------------------------  ↓ ↓ ↓  Unhealthy diet Physical Chronic  (food cost & inactivity stress  access) (built env.) (financial,  psychosocial)  ↓ ↓ ↓  Obesity / Reduced Neuroendocrine  visceral fat insulin dysregulation  sensitivity (↑ cortisol)  ↓ ↓ ↓  --------------------------------  ↓  Insulin resistance  ↓  Type 2 diabetes  Additional mediating branches often included:  Low SES  ↓  Limited healthcare access  ↓  Delayed detection / poor management of prediabetes  ↓  Progression to type 2 diabetes  and  Low SES (early life)  ↓  In utero stress / childhood undernutrition  ↓  Altered metabolic programming  ↓  Higher adult diabetes risk  **3. Life-course accumulation**  SES influences diabetes risk **cumulatively**, not at a single time point:   - **Early life:** fetal growth restriction, childhood nutrition, stress exposure - **Adolescence:** physical activity opportunities, educational pathways - **Adulthood:** occupational strain, income instability, food environments - **Later life:** access to preventive care and disease management   Each stage adds risk, and disadvantages **stack** over time. This explains why adult SES effects persist even after accounting for childhood conditions, and vice versa.  **4. Why this is mediation (not moderation)**   - SES **precedes** the mediators temporally - SES **changes the distribution** of mediators (diet, stress, obesity, care access) - Mediators are **on the causal pathway** to diabetes   SES does *not* primarily change the *strength* of the biological effect of obesity or insulin resistance; it changes **who is exposed to them and for how long**.  **5. Why adjusting for mediators changes interpretation**  **Example:**  If you regress diabetes on SES **without adjustment**:   - You estimate the **total effect** of SES on diabetes risk.   If you then adjust for obesity, diet, physical activity, or stress:   - You are estimating the **direct effect** of SES **not operating through those mediators**.   **Consequence:**   - The SES–diabetes association often attenuates or disappears. - This does **not** mean SES is unimportant. - It means SES operates **through** these pathways.   Adjusting for mediators answers a different question: *“Does SES affect diabetes risk through mechanisms other than diet, obesity, stress, and care access?”*  This is why “overadjustment” can misleadingly suggest no social gradient.  **6. Evidentiary limits**   1. **Residual confounding:** SES is multidimensional and imperfectly measured (income ≠ wealth ≠ education). 2. **Measurement error in mediators:** Diet, stress, and physical activity are often poorly captured, biasing mediation estimates. 3. **Time-varying mediation:** Mediators both change over time and affect future SES (e.g., illness → job loss), complicating causal inference. 4. **Limited experimental evidence:** Most evidence is observational; randomized SES interventions are rare. 5. **Mediator–mediator interactions:** Pathways are interdependent (e.g., stress affects diet), making clean decomposition difficult.   **7. Bottom line**  Socioeconomic status affects type 2 diabetes risk through **mediated, cumulative exposures across the life course**—not through a direct biological effect. Adjusting for mediators appropriately narrows the causal question but can obscure the **true social origins** of disease if misinterpreted. |
| Scenario 3 (Lay) Fruit consumption and type 2 diabetes *Effect modification* | A. Baseline additive | “What fruit is safe to eat if you have type 2 diabetes?” | If you have **type 2 diabetes**, you can safely eat fruit—**the key is choosing the right kinds and portions**. Fruits contain natural sugar, but many are rich in fiber, vitamins, and antioxidants that actually help with blood sugar control.  **Best fruits for type 2 diabetes (lower glycemic impact)**  These tend to raise blood sugar more slowly:   - **Berries** (strawberries, blueberries, raspberries, blackberries) High fiber, low sugar, very diabetes-friendly - **Apples** (with skin) - **Pears** - **Cherries** - **Plums** - **Peaches** - **Apricots** - **Kiwi** - **Oranges** (whole, not juice) - **Grapefruit** (check for medication interactions)   **Fruits to eat in moderation**  These are healthy but higher in sugar:   - Bananas (especially ripe) - Mango - Pineapple - Grapes - Papaya   **Fruits to limit or avoid**   - **Fruit juice** (even 100% juice spikes blood sugar) - **Dried fruit** (raisins, dates, dried cranberries) - Fruit canned in syrup   **Portion guidance (important!)**   - 1 small whole fruit - OR ½ cup chopped fruit - Pair fruit with **protein or healthy fat** (e.g., apple + peanut butter) to reduce glucose spikes   **Helpful tip**  Choose **whole fruits**, not blended or juiced, because fiber slows sugar absorption.  If you want, I can:   - Create a **daily fruit plan** - Help you choose fruit based on **your blood sugar readings** - Suggest **diabetes-friendly snacks** 🍓   Just tell me! |
| B. Optimised additive | “What fruit is safe to eat if you have type 2 diabetes? Explain your answer clearly and briefly indicate the kinds of reliable evidence typically used to support such advice (e.g. dietary guidelines, systematic reviews, or large observational studies).” | **Short answer:** People with type 2 diabetes can safely eat **most whole fruits**, especially those that are **high in fiber and have a low to moderate glycemic load**, when eaten in appropriate portions.  **Good fruit choices (examples):**   - **Berries** (strawberries, blueberries, raspberries): low sugar, high fiber and antioxidants - **Apples and pears**: fiber (especially the skin) slows blood-glucose rise - **Citrus fruits** (oranges, grapefruit): relatively low glycemic impact when eaten whole - **Cherries, kiwi, peaches, plums**: moderate carbohydrate content with beneficial nutrients   **Why these are safe:**   - Whole fruits contain **fiber**, which slows digestion and reduces blood-glucose spikes. - They have a **lower glycemic load** than fruit juice or refined sweets. - Regular fruit intake is associated with **better overall diet quality** and does **not worsen glycemic control** when portions are reasonable.   **What to limit or avoid:**   - **Fruit juice**, dried fruit, and fruit canned in syrup (high sugar, low fiber). - Very large portions of higher-sugar fruits (e.g., bananas, mangoes), though small portions can still fit into a balanced diet.   **Types of reliable evidence supporting this advice**   - **Clinical practice guidelines** (e.g., from diabetes and nutrition organizations) - **Systematic reviews and meta-analyses** of fruit intake and glycemic control - **Large prospective observational studies** linking whole fruit consumption with lower risk of diabetes complications - **Randomized controlled trials** comparing whole fruit vs. juice or refined carbohydrates   **Bottom line:** For type 2 diabetes, *whole fruit is safe and beneficial*—focus on fiber-rich options, eat reasonable portions, and avoid fruit in highly processed forms. |
| C. Interaction-aware inquiry | “What fruit is safe to eat if you have type 2 diabetes? Explain how the answer depends on different conditions, specifying key modifying factors (e.g. portion size, type of fruit, meal context, medication use), the interaction type (effects differ by condition), and short-term versus longer-term effects. Provide 3–5 ‘it depends’ statements and common oversimplifications to avoid.” | **Short answer:** *Most fruits can be safe for people with type 2 diabetes*—but **which fruit, how much, and how it’s eaten** matter. There isn’t one universally “safe” fruit; the effects **differ by condition**.  Below is a clear way to think about it.  **Generally safer fruit choices (when eaten appropriately)**  These tend to have **lower glycemic impact per serving** and/or more fiber:   - **Berries** (strawberries, blueberries, raspberries, blackberries) - **Cherries** - **Apples, pears** (with skin) - **Citrus** (oranges, grapefruit*) - **Kiwi** - **Plums, peaches** - **Avocado** (very low carb)   *Grapefruit can interact with some medications—see below.  **Key modifying factors (why “it depends”)**  **1) Portion size**   - **Interaction type:** Dose-dependent effect - **Short-term:** Larger portions raise post-meal blood glucose more - **Long-term:** Repeated large portions can worsen A1C - **Rule of thumb:** ~1 small whole fruit or ~½–1 cup berries per serving   *Even low-GI fruit can spike glucose if the portion is large.*  **2) Type of fruit (whole vs processed)**   - **Interaction type:** Form-dependent effect - **Short-term:**   - **Whole fruit:** slower glucose rise (fiber intact)   - **Juice/dried fruit:** rapid spikes - **Long-term:** Frequent juice intake is linked to poorer glycemic control - **Less ideal choices:** fruit juice, smoothies without fiber, raisins, dates   Chewing + fiber matter as much as sugar content.  **3) Meal context (what you eat it with)**   - **Interaction type:** Synergistic or buffering effect - **Short-term:** Pairing fruit with **protein, fat, or fiber** blunts glucose rise - **Long-term:** Improves overall meal glucose patterns - **Example:** Apple + peanut butter → smaller spike than apple alone   **4) Medication use**   - **Interaction type:** Drug–food interaction - **Short-term:**   - **Insulin or sulfonylureas:** fruit may help prevent hypoglycemia   - **Metformin:** usually neutral with fruit - **Special case:** Grapefruit can affect metabolism of some diabetes, blood pressure, or cholesterol drugs - **Long-term:** Medication + diet alignment improves A1C stability   **5) Individual glucose response & timing**   - **Interaction type:** Person-specific response - **Short-term:** Some people spike from bananas; others don’t - **Long-term:** Personalized patterns matter more than generic lists - **Tip:** Use a glucose meter or CGM to test responses 1–2 hours after eating   **Short-term vs longer-term effects (summary)**   | **Timeframe** | **What matters most** | | --- | --- | | **Short-term (hours)** | Portion size, fruit form, meal pairing | | **Long-term (weeks–months)** | Overall carb balance, fiber intake, consistency, medication fit |   **3–5 clear “It depends” statements**   1. **It depends on portion size—a small apple may be fine; two large ones may not.** 2. **It depends on the fruit form—whole fruit behaves very differently from juice.** 3. **It depends on what you eat it with—protein/fat can reduce glucose spikes.** 4. **It depends on your medications—some fruits interact with certain drugs.** 5. **It depends on your personal glucose response—individual variation is real.**   **Common oversimplifications to avoid**   - **❌ “People with diabetes can’t eat fruit.”** - **❌ “Low-GI fruit is always safe in any amount.”** - **❌ “Natural sugar doesn’t affect blood glucose.”** - **❌ “One fruit list works for everyone.”** - **❌ “Juice is the same as whole fruit.”**   **Bottom line**  **For most people with type 2 diabetes, whole fruit in moderate portions—especially berries and fiber-rich fruits—can fit into a healthy eating pattern, when matched to portion size, meal context, medications, and individual response.** |
| Scenario 4 (Lay) Diabetes medication and weight gain in type 2 diabetes *Mediation* | A. Baseline additive | “Why do some type 2 diabetes medicines cause weight gain?” | Some type 2 diabetes medicines cause weight gain because of **how they lower blood sugar and how they affect hormones, insulin levels, appetite, and fluid balance**. Here’s a clear breakdown:  **1. They increase insulin levels**  **Insulin promotes fat storage.** Medications that raise insulin—either directly or indirectly—can lead to weight gain.  **Examples**   - **Insulin injections** - **Sulfonylureas** (e.g., glipizide, glyburide) - **Meglitinides** (e.g., repaglinide)   **Why this happens**   - Insulin helps move glucose from the blood into cells - Excess glucose that isn’t immediately used gets stored as **fat** - Higher insulin levels also **reduce fat breakdown**   **2. They reduce sugar loss in urine**  When diabetes is uncontrolled, some glucose is lost through urine. Once medication improves control, **less glucose is lost**, meaning more calories stay in the body.   - This can cause modest weight gain even without increased eating - It’s often called **“caloric retention”**   **3. They increase appetite or cause hypoglycemia**  Some drugs can cause **low blood sugar (hypoglycemia)**, which triggers hunger.   - People may eat extra calories to prevent or treat low blood sugar - Over time, this can contribute to weight gain   Common culprits:   - Insulin - Sulfonylureas   **4. Fluid retention**  Certain medications cause the body to **hold onto fluid**, increasing weight that isn’t fat.  **Examples**   - **Thiazolidinediones (TZDs)** like pioglitazone   This weight gain may come with:   - Swelling (edema) - Increased risk of heart failure in susceptible patients   **5. Improved glucose use by fat cells**  Some medicines make fat cells more responsive to insulin.   - This improves blood sugar control - But also encourages fat storage   Example:   - TZDs   **Medications that are *less likely* to cause weight gain**  Some newer drugs are **weight-neutral or promote weight loss**:   - **Metformin** (often weight-neutral or slight loss) - **GLP-1 receptor agonists** (e.g., semaglutide) - **SGLT2 inhibitors** (e.g., empagliflozin) - **DPP-4 inhibitors** (generally weight-neutral)   **Key takeaway**  Weight gain from some type 2 diabetes medications is usually a **side effect of better glucose control, higher insulin levels, increased appetite, or fluid retention—not a lack of effort or willpower**.  If you’d like, I can:   - Compare diabetes drugs by **weight effect** - Help explain **which options fit certain health goals** - Discuss **ways to minimize weight gain** while keeping sugars controlled |
| B. Optimised additive | “Why do some type 2 diabetes medicines cause weight gain? Explain the main mechanisms involved and briefly indicate the kinds of reliable evidence typically used to support such explanations (e.g. clinical guidelines, systematic reviews, or large observational studies).” | Some (but not all) medicines used to treat type 2 diabetes lead to weight gain because of how they lower blood glucose and how they affect insulin action, energy balance, and fat storage. The key point is that improving glycaemia does not automatically mean improving body weight—the *mechanism* matters.  **Main mechanisms behind weight gain**  **1. Increased insulin levels → greater fat storage**  **Drugs involved:** insulin, sulfonylureas, meglitinides   - These therapies raise circulating insulin (either directly or by stimulating insulin secretion). - Insulin is an **anabolic hormone**: it promotes glucose uptake, glycogen synthesis, and **lipogenesis**, while inhibiting lipolysis. - When glucose that was previously lost in urine is now retained and stored, total caloric balance shifts toward weight gain.   **Simplified idea:** better glucose control + high insulin = more calories kept and stored as fat.  **2. Reduction in glycosuria (loss of calories in urine)**  **Drugs involved:** insulin, sulfonylureas, TZDs   - Poorly controlled diabetes causes glucose to spill into the urine, resulting in a net calorie loss. - Effective glucose-lowering therapy reduces this loss. - If food intake is unchanged, the patient now retains several hundred extra kilocalories per day.   **3. Hypoglycaemia-driven overeating**  **Drugs involved:** insulin, sulfonylureas   - These drugs can cause hypoglycaemia. - Patients may respond by eating extra calories (“defensive snacking”), often repeatedly. - Over time, this compensatory eating contributes to weight gain.   **4. Increased adipogenesis and fluid retention**  **Drugs involved:** thiazolidinediones (e.g., pioglitazone)   - TZDs activate **PPAR-γ**, a nuclear receptor that:   - Improves insulin sensitivity   - Promotes differentiation of pre-adipocytes into adipocytes - This leads to increased subcutaneous fat mass. - TZDs also cause **fluid retention**, contributing to weight gain that is partly non-fat mass.   **5. Reduced energy expenditure (minor contribution)**   - Improved glycaemic control reduces catabolic states (less protein and fat breakdown). - Basal energy expenditure may fall slightly as metabolic inefficiency improves.   **How we know this: types of reliable evidence**  These explanations are supported by several complementary forms of evidence:   - **Randomized controlled trials (RCTs)** Show consistent weight changes associated with specific drug classes compared with placebo or other therapies. - **Systematic reviews and meta-analyses** Quantify average weight gain (e.g., kg over 6–12 months) across many trials and populations. - **Clinical practice guidelines** (e.g., ADA, EASD, NICE) Synthesize trial and real-world data and explicitly classify diabetes medications by their typical weight effects. - **Large observational cohort studies** Confirm weight trajectories and long-term patterns in real-world use, outside tightly controlled trials. - **Mechanistic and physiological studies** Explain how insulin signaling, PPAR-γ activation, and renal glucose handling translate into changes in fat mass and fluid balance.   **Context note**  Not all diabetes drugs cause weight gain—metformin, GLP-1 receptor agonists, and SGLT2 inhibitors are weight-neutral or promote weight loss—highlighting that weight effects are **drug-mechanism specific**, not an inevitable consequence of glucose lowering.  If you want, I can also summarize weight effects by drug class in a quick comparison table. |
| C. Interaction-aware inquiry | “Why do some type 2 diabetes medicines cause weight gain? Explain this relationship by explicitly describing mediating processes, specifying the interaction type (mediation) and temporal pattern (early vs longer-term effects). Provide a step-by-step pathway explanation and explain common oversimplifications to avoid.” | Some **type 2 diabetes (T2D) medicines cause weight gain because their glucose-lowering effects are *mediated* by biological processes that also promote energy storage and increased intake**. The weight change is **not a direct effect of the drug itself**, but occurs **through intermediate (mediating) mechanisms**, with **distinct early vs longer-term temporal patterns**.  Below is a clear, step-by-step causal explanation.  **1. Core causal structure (explicit mediation)**  **Drug → Mediating biological processes → Behavioral & metabolic changes → Weight gain**  This is a **mediation relationship**, not a simple association:   - The medication changes *physiology first* - Those physiological changes alter *energy balance* - Weight gain emerges as a downstream outcome   **2. Step-by-step pathway by major drug classes**  **A. Insulin and insulin-secretagogues (e.g., sulfonylureas)**  **Step 1: Primary drug action (early)**   - ↑ Circulating insulin levels (exogenous insulin or stimulated endogenous insulin)   **Step 2: Mediating metabolic processes**   - **Insulin is an anabolic hormone**   - ↑ Glucose uptake into fat and muscle   - ↑ Lipogenesis (fat storage)   - ↓ Lipolysis (fat breakdown) - ↓ Glucosuria (less glucose lost in urine)   ➡ **More calories retained instead of excreted**  **Step 3: Behavioral mediation (early to intermediate)**   - Higher insulin → **hypoglycemia risk** - Hypoglycemia → **compensatory eating** - Patients may intentionally “eat to prevent lows”   ➡ **Increased caloric intake**  **Step 4: Longer-term outcome**   - Sustained positive energy balance - Gradual fat mass accumulation   **Temporal pattern**   - *Early*: Rapid water + glycogen weight gain - *Longer-term*: Fat mass increase   **B. Thiazolidinediones (TZDs, e.g., pioglitazone)**  **Step 1: Primary drug action (early)**   - Activation of **PPAR-γ** → ↑ insulin sensitivity   **Step 2: Mediating cellular processes**   - ↑ Differentiation of pre-adipocytes into fat cells - ↑ Fat storage capacity (especially subcutaneous fat) - ↑ Sodium retention → fluid accumulation   ➡ Weight gain occurs **even without increased food intake**  **Step 3: Fat redistribution (longer-term)**   - Shift from visceral to subcutaneous fat - Total body weight increases, but metabolic risk may improve   **Temporal pattern**   - *Early*: Fluid retention - *Longer-term*: Increased adipose tissue mass   **3. Why improved glucose control itself mediates weight gain**  This applies across several drug classes.  **Step 1: Poorly controlled diabetes**   - High blood glucose → glucose lost in urine - Net caloric loss (hundreds of kcal/day)   **Step 2: Medication improves glycemic control**   - ↓ Glucosuria   ➡ **Calories are now retained**  **Step 3: Downstream effect**   - If intake is unchanged, energy balance shifts positive - Weight gain follows   This is a **physiological mediation**, not a behavioral failure.  **4. What does *not* cause the weight gain (important clarification)**   - The drug does **not** directly “turn into fat” - Weight gain is **not** inevitable - It is **context-dependent**:   - Dose   - Baseline glucose levels   - Diet   - Physical activity   - Co-prescribed drugs  1. **Early vs longer-term temporal patterns (summary table)**  | **Timeframe** | **Dominant mediator** | **Weight change type** | | --- | --- | --- | | Days–weeks | Fluid retention, glycogen restoration | Rapid, reversible | | Weeks–months | Reduced glucosuria, hypoglycemia-driven eating | Gradual fat gain | | Months–years | Adipocyte differentiation, chronic anabolic signaling | Sustained fat mass |   **6. Common oversimplifications to avoid**  **❌ “These drugs cause weight gain because they increase appetite”**   - **Appetite changes are secondary, not universal** - **Many effects occur without appetite increase**   **❌ “Weight gain means the drug is bad”**   - **Some weight gain accompanies metabolic improvement** - **Example: TZDs increase weight but improve insulin sensitivity**   **❌ “Patients gain weight because they’re non-compliant”**   - **Ignores:**   - **Hypoglycemia-driven eating**   - **Loss of glucosuria**   - **Hormonal effects of insulin**   **❌ “All diabetes drugs cause weight gain”**   - **Incorrect:**   - **Metformin, GLP-1 receptor agonists, SGLT2 inhibitors often cause weight loss**   **7. One-sentence causal summary**  **Some type 2 diabetes medications lead to weight gain because their glucose-lowering effects are mediated by increased insulin action, reduced urinary calorie loss, fluid retention, and hypoglycemia-driven eating, producing early fluid-related weight changes followed by longer-term fat accumulation.**  **If you want, I can also:**   - **Compare weight effects across all diabetes drug classes** - **Draw a causal diagram (DAG)** - **Explain why newer agents reverse these mediating pathways** |
