# Supplementary material
Source: Research Square preprint supplement (doi:10.21203/rs.3.rs-8707900/v1)
Supplement: Supplementary file 2 [file 76c14504acf579b1df750ab7.docx]

Table 5. Demonstrator scenarios and inquiry conditions

Data collected: 06.01.2026

Platform: Perplexity

| Scenario (user type & interaction motif) | Condition | Prompt | Results |
| --- | --- | --- | --- |
| Scenario 1 (Expert) Physical activity and type 2 diabetes risk across socioeconomic contexts *Effect modification* | A. Baseline additive | “How much does physical activity reduce the risk of type 2 diabetes?” | Regular physical activity can lower the risk of developing type 2 diabetes by roughly 25–70%, depending on how much and how intensely someone is active. Even amounts below standard guidelines still provide meaningful risk reduction compared with being inactive.​  **Typical risk reduction ranges**   - About 150 minutes per week of moderate activity (for example, brisk walking 30 minutes on 5 days) is associated with roughly a 25–30% lower risk of type 2 diabetes versus being inactive.​ - Around 300 minutes per week of moderate activity is linked to about a 35–40% lower risk.​ - Very high activity levels (for example, ≥60 MET-hours/week, roughly equivalent to ~600 minutes/week of brisk walking) have been associated with up to about a 50–70% lower risk in some large cohort analyses.​   **Dose–response pattern**   - The relationship is generally dose-responsive: more activity brings greater risk reduction, with large benefits when moving from very low to moderate levels of activity.​ - Studies using devices (accelerometers) show a roughly linear decrease in diabetes incidence as moderate-to-vigorous physical activity increases, with no clear minimum threshold below which there is no benefit.​   **Guideline context**   - Major guidelines for people at risk of type 2 diabetes recommend at least 150 minutes per week of moderate-intensity or 75 minutes per week of vigorous-intensity aerobic activity, plus reduced sedentary time, as a core prevention strategy.​ - Lifestyle programmes combining increased physical activity with dietary changes and modest weight loss have reduced progression to type 2 diabetes by about 40–60% in high‑risk individuals in clinical trials.​ |
| B. Optimised additive | “How much does physical activity reduce the risk of type 2 diabetes? Explain your reasoning step by step and briefly indicate the kinds of reliable evidence typically used to support such explanations (e.g. clinical guidelines, systematic reviews, or large observational studies).” | Regular physical activity is associated with roughly 25–35% lower risk of developing type 2 diabetes at guideline-level activity, and often 40–60% lower risk in intensive lifestyle programmes for people at high risk, but these are average population effects rather than guarantees for individuals. This relationship is supported mainly by large prospective cohort studies, dose–response meta-analyses, and randomized lifestyle‑intervention trials, and is reflected in national clinical guidelines.​  **Size of risk reduction**   - A dose–response meta-analysis of prospective cohorts found about a 26% lower risk of type 2 diabetes for people doing around 150 minutes per week of moderate activity (11.25 MET‑hours/week) compared with inactive adults.​ - Other systematic reviews of cohort studies report that being physically active is linked to roughly 30–35% lower diabetes risk overall, with brisk or higher‑intensity activity associated with up to about 39% lower risk.​ - In people with prediabetes, prospective cohort data show that moderate and high physical activity levels are associated with around 24–43% lower incidence of type 2 diabetes compared with low activity.​   **Evidence from intervention trials**   - Randomized lifestyle‑intervention trials (for example, the Diabetes Prevention Program and similar studies) show that intensive programmes combining increased physical activity with diet and modest weight loss can reduce progression from prediabetes to diabetes by about 30–60% over several years compared with usual care or placebo.​ - In the Diabetes Prevention Program, an intensive lifestyle arm targeting at least 150 minutes per week of moderate activity plus weight loss reduced diabetes incidence by about 58% over about 3 years compared with placebo.​ - Meta-analysis of such lifestyle interventions finds an average relative risk reduction of about 31% (95% CI roughly 15–44%) for developing diabetes, when programmes last 6–24 months.​   **Step-by-step reasoning about “how much”**   1. Start with baseline population risk: among adults with impaired glucose regulation, a substantial proportion will develop diabetes over a few years without intervention.​ 2. Compare inactive vs active people in cohorts: inactive groups consistently have higher incidence; when adjusting for confounders, relative risks around 0.65–0.75 for active vs inactive are typical, implying about 25–35% lower risk at guideline‑level activity.​ 3. Examine dose–response: risk falls as weekly activity increases up to around 5–7 hours of leisure‑time activity per week, with diminishing additional benefit at very high levels; this supports a graded, non‑linear effect.​ 4. Look at trials in high‑risk people: when people actually increase activity within structured programmes, diabetes incidence falls by roughly one‑third to over one‑half compared with controls, showing that changing behaviour can alter risk, not just correlate with it.​ 5. Interpret what is attributable to activity itself: improved insulin sensitivity and cardiorespiratory fitness likely explain part of the effect, but some benefit comes indirectly through weight loss and other lifestyle changes, so it is hard to isolate an exact percentage for activity alone.​   **Types of evidence typically used**   - Prospective cohort studies: follow large groups of initially diabetes‑free adults, measure physical activity, and track incident diabetes; these provide relative risks and dose–response patterns but are observational and prone to residual confounding.​ - Systematic reviews and meta-analyses: pool multiple cohort studies or trials to estimate overall risk reduction and explore how effects vary by activity type, intensity, or population subgroup.​ - Randomized controlled trials of lifestyle interventions: allocate high‑risk individuals to structured programmes (increasing activity, changing diet) vs control, providing stronger causal evidence about reducing progression to diabetes.​ - Clinical and public health guidelines (for example, NICE and UK physical activity guidance) synthesize this body of evidence to recommend activity targets (around 150 minutes/week of moderate activity) specifically for diabetes prevention and related cardiometabolic outcomes.​   **Key uncertainties and limitations**   - Observational studies cannot fully rule out confounding by factors such as diet, weight, socioeconomic status, or underlying health, so some of the apparent benefit may reflect healthier overall lifestyles.​ - Trial results come mainly from structured programmes in selected high‑risk groups, with intensive support, so real‑world, long‑term risk reduction may be smaller if people cannot maintain similar activity levels.​ - The exact contribution of physical activity vs weight loss, diet, and medication is difficult to separate, so effect sizes should be viewed as approximate population averages, not precise individual forecasts.​ |
| C. Interaction-aware inquiry | “How much does physical activity reduce the risk of type 2 diabetes? Explain how this relationship differs across socioeconomic and healthcare-access contexts. Specify relevant determinant domains, the interaction type (effect modification), the time horizon (short-term vs long-term effects), and evidentiary limits. Provide 3–5 conditional ‘if–then’ statements and key uncertainties.” | Regular physical activity is associated with roughly 25–35% lower risk of developing type 2 diabetes at guideline-level activity, and about 50–60% lower risk in intensive lifestyle programs for high‑risk groups, but this average benefit is smaller or harder to realize in socioeconomically disadvantaged and low‑access settings. The apparent size and durability of the effect are modified by determinants such as income, neighbourhood environment, healthcare access, and baseline metabolic risk.​  **Magnitude and time horizon of effect**   - Large cohort dose–response meta-analyses suggest about 25–30% lower type 2 diabetes incidence for people achieving around 150 minutes/week of moderate activity (≈11.25 MET‑h/week) compared with inactive individuals, with further reductions up to at least 300 minutes/week.​ - Intensive lifestyle interventions combining increased activity, diet change, and modest weight loss in high‑risk individuals (impaired glucose tolerance or prediabetes) have reduced progression to diabetes by about 50–60% over ≈3 years, with benefits persisting for many years, although attenuated.​   Short‑term vs long‑term:   - Short term (weeks–months): activity improves insulin sensitivity and fasting glucose in people with prediabetes; some cohorts show lower or stable fasting glucose over follow‑up among moderately or highly active participants, versus rising glucose in low‑activity groups.​ - Long term (years–decades): repeated measures cohorts show sustained associations between higher habitual activity and lower diabetes incidence across 10–20 years, with no clear lower threshold and diminishing marginal returns at very high volumes.​   **Determinant domains and effect modification**  Relevant determinant domains shaping how activity “translates” into diabetes risk reduction include:   - Socioeconomic position (income, education, occupation): Lower occupational class and cumulative adverse socioeconomic factors confer ≈1.5–2.5‑fold higher diabetes risk, partly mediated by behaviours (including low physical activity) and adiposity. This means the *baseline* risk is higher and the same relative risk reduction from activity still leaves higher absolute risk.​ - Neighbourhood and built environment: More deprived areas show higher prevalence of obesity, smoking, and low physical activity, which together explain a substantial fraction of the excess diabetes risk. Limited safe spaces to be active and time constraints can reduce ability to achieve the activity levels seen in trials.​ - Healthcare access and quality: High‑risk people in systems with structured diabetes‑prevention programmes (risk scoring, referral to lifestyle support) are more likely to receive intensive interventions that achieved 50–60% risk reductions in trials and real‑world programs. In low‑access contexts, screening is delayed, comorbidities are under‑managed, and advice/support for activity is limited, so the achievable and *observed* effect of activity can be smaller.​ - Baseline metabolic risk and comorbidities: In prediabetes cohorts, moderate and high physical activity levels are associated with ≈24–43% lower incident diabetes compared with low activity, but this benefit is mainly observed in those *without* metabolic syndrome, indicating biological effect modification by existing metabolic damage.​   Interaction type (effect modification):   - Socioeconomic status and neighbourhood deprivation modify the *impact* of physical activity in at least two ways:   - By changing baseline risk and absolute benefit: the same relative risk reduction yields larger absolute risk reductions in high‑risk disadvantaged groups, but those groups often face more barriers to maintaining activity.​   - By altering the activity–risk association itself: emerging evidence suggests that the inverse association between moderate–vigorous activity and diabetes may be weaker when metabolic syndrome is already present, and patterns of activity differ by SES (for example, strenuous leisure sport is more common in higher‑SES groups).​   **Contextual ‘if–then’ statements**   - If an adult with prediabetes and no severe mobility limitation engages in roughly guideline‑level leisure‑time physical activity (≈150 minutes/week moderate intensity) over several years *and* has reasonable access to preventive healthcare, then population data suggest about a 25–35% lower risk of developing type 2 diabetes compared with being inactive.​ - If a high‑risk individual (impaired glucose tolerance, overweight) participates in a structured lifestyle programme that combines increased physical activity with dietary change and modest (≈5–7%) weight loss, then progression to diabetes over 3–4 years is often reduced by about 50–60%, but such programmes are typically more available in well‑resourced health systems than in settings with limited primary care.​ - If someone lives in a highly deprived neighbourhood with unsafe streets, time‑pressured shift work, and limited access to affordable facilities, then even with strong motivation the *realistic* increase in sustained physical activity is smaller, so the actual risk reduction achieved is likely below the averages reported in intensively supported trials and more akin to modest cohort‑level reductions.​ - If an individual already has metabolic syndrome and central obesity, then increasing physical activity may still improve glycaemic control, but cohort data suggest the relative reduction in incident diabetes can be smaller than in metabolically healthier people with prediabetes, because underlying metabolic damage is more advanced.​ - If healthcare and social policies reduce material deprivation, improve neighbourhood walkability, and provide low‑barrier prevention programmes, then the same physiological benefits of activity can lead to larger population‑level reductions in diabetes incidence by making higher activity levels more attainable and sustainable for disadvantaged groups.​   **Evidentiary limits and key uncertainties**  Evidence base and limits   - Most estimates of 25–35% relative risk reduction come from prospective cohort studies, which can be affected by residual confounding (for example, healthier diet, lower smoking, or health consciousness among more active people).​ - Intensive lifestyle trials demonstrate ≈50–60% risk reduction in selected high‑risk participants under structured conditions with frequent counselling; translating these effects to routine practice, especially in low‑resource or high‑deprivation settings, is uncertain.​ - Studies of socioeconomic modification often rely on occupational class or area‑level indices, which can misclassify individual circumstances and do not fully capture structural barriers such as discrimination, informal work, or unstable housing.​   Three key uncertainties   - The exact contribution of physical activity *per se* versus weight loss, diet quality, medication, and other behaviours remains unclear; in some analyses of prevention trials, weight loss explains a large share of the risk reduction, with physical activity having a smaller independent effect.​ - How strongly socioeconomic context truly modifies the biological effect of a given “dose” of activity, as opposed to primarily altering who can achieve and maintain that dose, is still debated; robust interaction analyses across diverse settings are limited.​ - Long‑term (>20 years) sustainability of the observed benefits, particularly across lifecourse transitions (retirement, unemployment, illness) and in low‑ and middle‑income countries, is not well characterized, since most detailed follow‑ups are from high‑income cohorts and specific prevention programmes.​   This information describes population‑level patterns and mechanisms and does not replace personalised medical advice or clinical risk assessment. |
| Scenario 2 (Expert) Socioeconomic disadvantage and type 2 diabetes risk *Mediation* | A. Baseline additive | “Why does socioeconomic status affect the risk of type 2 diabetes?” | Socioeconomic status (SES) affects type 2 diabetes risk because it shapes daily living conditions, health behaviours, stress exposure, and access to prevention and care, all of which influence blood sugar regulation and long‑term metabolic health.​  **How low SES raises risk**   - People with lower income and education are more likely to develop type 2 diabetes than those who are better off, with studies showing an inverse relationship between SES and diabetes risk in many countries.​ - Large cohort data show that sustained low income and income drops over several years are associated with a significantly higher incidence of type 2 diabetes, whereas sustained high income or income gains lower risk.​   **Lifestyle and environment**   - Lower SES is linked to food insecurity and poorer diet quality, such as higher reliance on cheap, energy‑dense, ultra‑processed foods and lower intake of fruits, vegetables, and whole grains, which promotes weight gain and insulin resistance.​ - People in more deprived areas often face fewer safe spaces for physical activity and more sedentary work or unemployment, making regular exercise harder and increasing obesity and diabetes risk.​   **Stress and mental health**   - Financial strain, unstable employment, and housing insecurity create chronic psychosocial stress, which raises stress hormones like cortisol and can worsen insulin resistance and abdominal fat accumulation.​ - Deprivation is also associated with higher rates of depression and other mental health problems, which can reduce motivation and capacity to maintain healthy routines and attend medical appointments.​   **Access to healthcare and information**   - Lower‑income groups are less likely to receive regular health screening, timely diagnosis, and optimal treatment for prediabetes and early diabetes, increasing the chance that high blood sugar persists for years before being addressed.​ - Costs of visits, transport, prescriptions, and time off work, plus lower health literacy, all make it harder to follow prevention advice and complex treatment plans, leading to poorer control and more complications once diabetes develops.​   **Early life and structural factors**   - Socioeconomic disadvantage from childhood onwards is associated with higher adult diabetes risk, partly via early undernutrition or obesity, adverse childhood experiences, and limited educational opportunities that shape lifelong health behaviours and job options.​ - At a broader level, living in deprived neighbourhoods concentrates multiple risks—unhealthy food environments, fewer services, unsafe conditions, and weaker social support—making type 2 diabetes more common in these communities even after accounting for individual factors.​ |
| B. Optimised additive | “Why does socioeconomic status affect the risk of type 2 diabetes? Explain your reasoning step by step and briefly indicate the kinds of reliable evidence typically used to support such explanations (e.g. clinical guidelines, systematic reviews, or large observational studies).” | Socioeconomic status (SES) affects type 2 diabetes risk because it shapes long-term exposure to behaviours, environments, and stresses that drive insulin resistance and weight gain, and it also constrains access to early detection and effective care. Large cohort and systematic review evidence shows a graded pattern: as income, education, and occupational grade decrease, incidence and complications of type 2 diabetes increase.​  **Step‑by‑step causal pathway**   1. Baseline: what SES captures    - SES usually includes income, education, occupation, and area‑level deprivation (how deprived a neighbourhood is overall).​    - These dimensions correlate with material resources (money, housing), knowledge and health literacy, and social power, all of which influence daily health‑related choices and constraints.​ 2. Behavioural risk factors shaped by SES    - Lower SES is associated with higher rates of obesity, physical inactivity, smoking, and unhealthy diet (more ultra‑processed, energy‑dense foods, fewer fruits and vegetables).​    - These behaviours promote central adiposity and insulin resistance, which are key biological mechanisms leading to type 2 diabetes.​ 3. Environmental and neighbourhood effects    - People in more deprived areas are more likely to live in “obesogenic” environments: fewer safe places to exercise, poorer walkability, and higher density of fast‑food outlets relative to healthy food retailers.​    - Longitudinal studies show that, even after adjusting for individual factors, living in more deprived neighbourhoods is linked to higher diabetes incidence, suggesting contextual effects beyond individual choice.​ 4. Access to healthcare and preventive services    - Lower income and education are linked to reduced use of preventive care, such as health checks, blood glucose screening, and early intervention for pre‑diabetes.​    - When diabetes develops, lower SES is associated with barriers such as cost, transport, time off work, and mistrust, which reduce treatment adherence and glycaemic control and increase complication risk.​ 5. Chronic psychosocial stress and work conditions    - Financial insecurity, unstable or hazardous work, job strain, and social disadvantage increase chronic stress, which raises cortisol and sympathetic nervous system activity.​    - Chronic stress is associated with increased abdominal fat, higher glucose, and poorer sleep, all of which promote insulin resistance and diabetes.​ 6. Lifecourse and intergenerational influences    - Low SES in childhood is linked to poorer nutrition, higher obesity, and less health literacy, which track into adulthood and raise lifetime diabetes risk.​    - Intergenerational poverty can maintain clusters of risk factors (e.g. crowded housing, low‑quality diet, limited education), sustaining higher incidence across generations.​ 7. Residual SES effects beyond behaviours    - Even after adjusting for BMI, diet, physical activity, and smoking, many studies still find an independent association between low SES and diabetes incidence.​    - This residual effect suggests additional pathways, such as unmeasured stressors, environmental toxins, and subtle healthcare disparities, rather than “lifestyle choice” alone.​   **Types of evidence used**   - Large observational studies (cross‑sectional and cohort)   - National surveys and cohort studies link individual income, education, occupation, and area deprivation to diabetes prevalence and incidence using regression models that adjust for confounders.​   - Examples include longitudinal cohort analyses of neighbourhood deprivation and incident type 2 diabetes, and national datasets linking income trajectories to new diabetes diagnoses.​ - Systematic reviews and narrative reviews of social determinants   - Systematic or scoping reviews synthesise many observational studies to summarise how SES indicators relate to diabetes risk factors, incidence, and outcomes, providing stronger overall evidence for a graded association.​   - These reviews often evaluate consistency across countries, age groups, and SES measures, and examine whether associations persist after adjusting for behaviours and BMI.​ - Clinical and public health guidelines   - Diabetes prevention and management guidelines increasingly highlight social determinants (income, education, area deprivation) as key context for assessing risk and designing interventions.​   - These documents typically rely on systematic reviews and large epidemiological studies, and recommend population‑level strategies (e.g. improving access to healthy food and preventive care in deprived areas).​ - Health services and outcomes research   - Studies of healthcare utilisation and complications show that lower SES is associated with poorer glycaemic control, higher HbA1c, more complications, and higher mortality among people with diabetes.​   - These analyses support mechanisms involving unequal access to high‑quality ongoing care and self‑management support, not just unequal incidence.​   Overall, SES affects type 2 diabetes risk through intertwined behavioural, environmental, healthcare, stress, and lifecourse pathways, with this explanation supported mainly by large observational studies, systematic reviews, and reflected in guideline discussions of social determinants.​ |
| C. Interaction-aware inquiry | “Why does socioeconomic status affect the risk of type 2 diabetes? Explain this relationship by explicitly describing mediating pathways, specifying the interaction type (mediation), temporal framing (life-course accumulation), and evidentiary limits. Provide a pathway description using arrows and explain why adjusting for mediators changes interpretation.” | Socioeconomic status (SES) affects type 2 diabetes risk mainly through mediating pathways that accumulate over the life course, rather than via a single, direct biological effect. This means SES shapes exposures (like diet, stress, work, environment) that in turn influence metabolic risk and diabetes incidence.  **Core mediation pathway**  A simplified pathway can be written as:  Low SES → material constraints / psychosocial stress / adverse environments → health behaviors & metabolic changes → chronic hyperglycemia → type 2 diabetes.  Key mediators in this chain typically include:   - Material conditions: food insecurity, lower-quality diets, less safe spaces for activity, poorer housing, and limited healthcare access, all of which promote obesity, hypertension, and dyslipidemia that precede diabetes. - Psychosocial stress: financial strain, job insecurity, status anxiety, and low job control can provoke chronic stress responses (elevated cortisol, autonomic imbalance), promoting central adiposity, insulin resistance, and disturbed glucose metabolism. - Health behaviors: higher rates of smoking, physical inactivity, short or poor-quality sleep, and higher consumption of ultra-processed or energy-dense foods are more common in lower SES groups and lie on the pathway from SES to obesity and diabetes. - Work and neighborhood environments: high-strain jobs, shift work, long hours, and deprived neighborhoods (pollution, lack of green space, limited access to healthy food) all contribute to weight gain and insulin resistance over time.   In terms of interaction type, this is mediation: SES affects diabetes risk *through* these intermediate variables; SES is the exposure, the behavioral/psychosocial/metabolic factors are mediators, and diabetes is the outcome.  **Life-course accumulation**  The SES–diabetes relationship reflects life-course accumulation of disadvantage rather than a single time-point effect.   - Early-life SES shapes birth weight, childhood nutrition, and early adiposity, which influence later insulin sensitivity and pancreatic beta-cell reserve. - Education, employment opportunities, and income across adulthood then determine ongoing exposure to unhealthy work conditions, chronic stress, obesogenic environments, and limited preventive care, allowing risk factors such as obesity, hypertension, and prediabetes to accumulate. - Neighborhood deprivation and retirement resources in older age continue this accumulation, affecting late-life physical activity, diet, and access to diabetes screening and management.   Thus, the pathway is better conceptualized as:  Childhood SES → education → adult SES (income, occupation, neighborhood) → long-term behaviors & stress & metabolic profile → type 2 diabetes in mid/late life.  **Pathway diagram with mediators**  One explicit pathway (among several) can be described like this:  Low childhood SES → lower educational attainment → lower adult income / more precarious jobs → chronic financial strain & status anxiety → prolonged psychosocial stress and limited time/energy for healthy behaviors → poorer diet, less physical activity, more smoking, worse sleep → central obesity, systemic inflammation, insulin resistance → impaired glucose tolerance and beta-cell stress → type 2 diabetes.  Additional parallel and interacting pathways include:   - Low SES → disadvantaged neighborhoods → limited healthy food access & walkability → higher obesity risk → diabetes. - Low SES → hazardous, high-strain, or shift work → circadian disruption & stress → insulin resistance → diabetes. - Low SES → reduced healthcare access and health literacy → less timely screening and management of obesity, hypertension, and prediabetes → higher progression to diabetes.   All of these are mediating mechanisms: the effect of SES on diabetes is carried through these intermediate states rather than being purely direct.  **Why adjusting for mediators changes interpretation**  In statistical models, what is included or excluded as an “adjustment” variable changes what is being estimated:   - If the goal is to estimate the total effect of SES on diabetes, then mediators (e.g., obesity, health behaviors, stress markers) should *not* be adjusted for.   - The total effect includes both the direct pathway and all indirect pathways through mediators. - If mediators are added to the model, the remaining SES–diabetes association estimates the direct effect of SES *not explained by those mediators*.   - The portion of the association that disappears after adjusting for mediators is interpreted as the effect transmitted through those mediators.   Conceptually, using the earlier pathway:  Low SES → chronic stress → obesity → diabetes,   - A model adjusting only for age and sex estimates the total effect of SES on diabetes (including the stress and obesity pathways). - A model that additionally adjusts for obesity removes the part of the SES effect that operates *through* obesity, isolating what remains (for example, effects via stress that are not captured by BMI, or via healthcare access or unmeasured factors). - If you further adjust for stress measures, you remove part of the stress-mediated effect; the SES coefficient now reflects the effect not captured by either obesity or measured stress.   Thus, adjusting for mediators changes the question from “How much does SES change diabetes risk overall?” to “How much does SES change diabetes risk *if we hold these mediating factors constant*?”  This has three important implications:   1. Underestimation of total inequality: If the interest is in social inequalities in diabetes, adjusting for behaviors or BMI can make the SES effect look smaller, but that does not mean SES is unimportant; it means SES operates through those variables, which are themselves consequences of SES. 2. Policy interpretation: If a large proportion of the SES effect is attenuated by adjusting for diet, physical activity, or financial strain, this supports interventions targeting those mediators as mechanisms for reducing SES-based inequalities in diabetes risk. 3. Risk of over-adjustment bias: Including true mediators as confounders can introduce bias if there are unmeasured common causes of the mediator and the outcome; causal mediation analysis methods are needed to interpret such models rigorously.   In sum, SES affects type 2 diabetes risk via mediated, life-course pathways through material conditions, psychosocial stress, behaviors, and metabolic changes, and controlling for these mediators changes the estimated SES effect from total to direct, with corresponding changes in causal and policy interpretation. |
| Scenario 3 (Lay) Fruit consumption and type 2 diabetes *Effect modification* | A. Baseline additive | “What fruit is safe to eat if you have type 2 diabetes?” | Most people with type 2 diabetes can safely eat a wide variety of whole fruits, especially lower‑glycaemic, higher‑fibre options like berries, apples, citrus fruits, pears, and peaches, in modest portions. The key is to choose whole fruit (not juice), watch portion sizes, and spread fruit intake through the day to avoid blood sugar spikes.​  **Best everyday choices**  These fruits tend to have a lower glycaemic index (GI) and good fibre, so they raise blood sugar more slowly when eaten in reasonable portions.   - Berries (strawberries, blueberries, raspberries, blackberries): Low GI and rich in fibre and antioxidants, often listed among the best fruits for people with diabetes.​ - Apples and pears: Low to moderate GI, good fibre content; commonly recommended as safe fruit options for type 2 diabetes when eaten as whole fruit with the skin.​ - Citrus fruits (oranges, grapefruit): Low GI and high in vitamin C and fibre; frequently recommended as good choices for blood sugar management.​ - Stone fruits (peaches, plums, apricots, nectarines): Generally low to moderate GI and can fit well into a diabetes meal plan.​   **Other fruits that can fit**  These can still be safe if you mind portion size and pair them with protein or healthy fats.   - Melons (watermelon, cantaloupe, honeydew): Can be included in measured portions; some lists note they are relatively low in carbs per cup but still sweet, so portions matter.​ - Grapes, cherries, kiwi, mango, pineapple: Contain more sugar per portion or a higher GI, but can still be eaten in small portions as part of a balanced meal.​ - Avocado: Very low GI and high in healthy fat and fibre, often highlighted as particularly suitable for people with diabetes.​   **Fruits and forms to be more cautious with**  These are not “forbidden,” but they need extra care to avoid blood sugar spikes.   - Fruit juice (even 100%): Lacks fibre and can cause rapid rises in blood sugar; many diabetes guidelines advise limiting or avoiding juice.​ - Dried fruit (raisins, dried figs, cranberries): Much more concentrated in sugar and easy to overeat; usually recommended only in very small amounts, if at all.​ - Very ripe bananas and larger portions of high‑sugar fruits (e.g., ripe bananas, pineapple): Can raise blood sugar more quickly, so smaller servings and pairing with protein/fat (like nuts or yoghurt) is advised.​   **General tips for eating fruit with type 2 diabetes**   - Aim for whole fruit, not juice, and keep to about one small piece or ½–1 cup per serving, depending on the fruit and your meal plan.​ - Spread fruit across the day instead of eating several servings at once, and try to combine it with protein or healthy fats (e.g., yoghurt with berries, apple with peanut butter) to blunt glucose spikes.​ - Check your blood sugar response after new fruits or portion sizes; individual responses vary, and your healthcare team or dietitian can help tailor a list and serving sizes for you. |
| B. Optimised additive | “What fruit is safe to eat if you have type 2 diabetes? Explain your answer clearly and briefly indicate the kinds of reliable evidence typically used to support such advice (e.g. dietary guidelines, systematic reviews, or large observational studies).” | Most people with type 2 diabetes can safely eat whole fruit in moderate portions, especially lower–glycaemic, high‑fibre fruits such as berries, apples, pears, oranges, kiwifruit and cherries. Whole fruit is generally preferred over fruit juice or large amounts of dried fruit, which raise blood glucose more quickly.  **Safe fruit choices**   - Lower‑glycaemic fruits like berries, apples, pears, oranges, grapefruit, cherries and plums tend to cause smaller rises in blood glucose because they contain more fibre and less rapidly available sugar per bite.​ - Regular intake of whole fruit is linked with a *lower* risk of developing type 2 diabetes and better cardiometabolic health, not a higher risk.​ - Guidelines for people with type 2 diabetes state that whole fruit is “good for everyone” and does not need to be avoided, but portions should be spread through the day and counted within the overall carbohydrate intake.​   **Fruits to limit and how**   - Fruit juice (even 100% juice) lacks most fibre and is digested quickly, so it tends to raise blood glucose more than the same fruit eaten whole and is not associated with the same benefits.​ - Dried fruit, grapes and some tropical fruits (for example mango) are easy to overeat because they are dense in sugar and energy, so small measured portions are advised rather than large handfuls or frequent snacking.​   **Typical evidence behind this advice**   - National and international dietary guidelines for diabetes summarise the best available data and give practical recommendations on fruit type, portion size and pattern of eating.​ - Systematic reviews and meta‑analyses of prospective cohort studies pool data from many populations and show how different levels and types of fruit intake relate to type 2 diabetes risk over time.​ - Large observational cohort studies and mechanistic trials (for example, studies of berries and post‑meal glucose and insulin levels) explore how specific fruits or patterns of fruit intake affect blood sugar, insulin resistance and diabetes incidence.​   In practice, someone with type 2 diabetes is usually encouraged to eat a variety of whole fruits, emphasise higher‑fibre, lower‑glycaemic options, keep portions moderate and limit juice and large quantities of very sugary or dried fruits, ideally with personalised advice from a registered dietitian or diabetes team.​ |
| C. Interaction-aware inquiry | “What fruit is safe to eat if you have type 2 diabetes? Explain how the answer depends on different conditions, specifying key modifying factors (e.g. portion size, type of fruit, meal context, medication use), the interaction type (effects differ by condition), and short-term versus longer-term effects. Provide 3–5 ‘it depends’ statements and common oversimplifications to avoid.” | Most people with type 2 diabetes can safely eat a wide variety of whole fruits, as long as portions are moderate and spread through the day, and fruit is eaten in the right context (e.g. with meals, not as large standalone sugar hits). The safest patterns emphasise whole, lower–glycaemic fruits (like berries, apples, pears, citrus, cherries, peaches, plums, and kiwi), matched to your medications, glucose targets, and overall carb allowance.​  **Core principles**   - Having diabetes does not mean avoiding fruit altogether; guidance from major diabetes organisations is to include fruit as part of a balanced diet, aiming for about 5 portions of fruit and vegetables a day. The key is controlling total carbohydrate and distributing fruit across the day rather than eating large amounts at once.​ - Whole fruit is preferred to juices or sugary fruit products because fibre slows digestion, blunts spikes in blood glucose, and helps you feel full.​ - Many commonly eaten fruits such as apples, berries, cherries, citrus, grapes, pears, peaches and plums have low to moderate glycaemic index values and can fit well into a type 2 diabetes eating pattern when portions are controlled.​   **What fruit is “safer”?**  Safer here means less likely to cause sharp post‑meal glucose spikes when eaten in appropriate portions.   - Lower‑GI or lower‑carb fruits often recommended include: berries (strawberries, blueberries, raspberries), cherries, apples, pears, citrus (oranges, grapefruit), peaches, plums, kiwi and avocado.​ - These fruits bring useful fibre, vitamins and antioxidants, and in studies, habitual intake of whole fruits like apples, blueberries and grapes is associated with lower risk of developing type 2 diabetes over time.​ - Fruit types that tend to spike glucose faster include fruit juice, smoothies made mostly from fruit, dried fruit and very large portions of high‑sugar fruits (e.g. big bowls of grapes or tropical fruit), so these are best limited or carefully portioned.​   **Key “it depends” factors**  **1. It depends on portion size**   - A small serving of almost any whole fruit (around 15 g carbohydrate) tends to have a similar effect on blood sugar, regardless of whether the fruit is naturally sweeter, because the total carbohydrate load is similar. Typical “one exchange” portions are about one small to medium whole fruit, or roughly ¾–1 cup of berries or cut fruit.​ - Eating multiple servings at once (e.g. a large bowl of grapes plus a banana) adds up the carbohydrate and can cause significant short‑term glucose spikes, even if each fruit is otherwise considered “good for diabetes”.​   Interaction type: The same fruit behaves differently at different portion sizes; a small apple with a meal might barely nudge glucose, whereas three apples between meals will raise it much more.  Short‑ vs long‑term:   - Short‑term: bigger portions mean higher post‑meal glucose.​ - Long‑term: routinely oversized fruit portions can worsen overall glucose control and weight management, while modest portions support a more sustainable, nutrient‑dense diet.​   **2. It depends on the type and form of fruit**   - Whole, intact fruit with skin and fibre (e.g. apples with skin, berries, pears, citrus segments) is generally better than fruit juice, purées, fruit drinks or dried fruit, which have less fibre and a higher concentration of sugar per bite or sip.​ - Fruits with lower glycaemic index (e.g. cherries, apples, pears, berries, citrus) usually cause slower, smaller glucose rises than high‑GI fruit products such as juice or large amounts of watermelon, especially when eaten alone.​   Interaction type: The same carbohydrate amount in juice may spike glucose more than in whole fruit because the fibre matrix is removed and absorption is faster.​  Short‑ vs long‑term:   - Short‑term: liquid or very processed fruit forms cause sharper spikes.​ - Long‑term: sticking mainly to whole fruits has been associated with better cardiometabolic outcomes and lower risk of type 2 diabetes compared with high intake of sugary drinks.​   **3. It depends on meal context**   - Fruit eaten with a meal that contains protein, fat and fibre (e.g. yogurt with berries, apple slices with nuts, orange after a balanced lunch) is absorbed more slowly and usually raises blood sugar less than the same fruit eaten alone on an empty stomach.​ - Very high‑carb meals plus fruit (e.g. white bread, sugary drink, and fruit) may push total carbohydrate beyond what your body or medication can handle, triggering higher peaks.​   Interaction type: Meal composition modifies the impact of the fruit; protein, fat and fibre slow glucose entry into the bloodstream, so the “same” fruit can be higher‑ or lower‑impact depending on what accompanies it.​  Short‑ vs long‑term:   - Short‑term: pairing fruit with protein/fat helps flatten spikes and improve satiety.​ - Long‑term: routinely integrating fruit into balanced meals can support weight management, lipid profile and overall diet quality.​   **4. It depends on your medication and glucose targets**   - If you use medicines that can cause hypoglycaemia (e.g. insulin, some sulfonylureas), a portion of fruit can be a useful, predictable carbohydrate source to prevent or treat lows, but timing and size may need adjustment to avoid highs later.​ - If your medication regimen is minimal (e.g. diet only, metformin alone) and your own glucose monitoring shows strong spikes after certain fruits (or at certain times of day), you may need to choose lower‑GI fruits and/or smaller portions, especially between meals.​   Interaction type: Medication changes the “room” you have for carbohydrate; the same portion of grapes that is fine on one regimen may cause highs or lows on another.​  Short‑ vs long‑term:   - Short‑term: fruit plus medication can either smooth out glucose (e.g. preventing lows) or overshoot into hyperglycaemia if mismatched.​ - Long‑term: matching fruit intake to your prescribed carb goals and regularly reviewing meter/CGM data helps keep A1c and weight in target while still including fruit.​   **5. It depends on your overall metabolic context**   - People with obesity, insulin resistance or metabolic syndrome often benefit from focusing on higher‑fibre, lower‑GI fruits (berries, apples, citrus, pears) and limiting more concentrated sources (dried fruit, juices), as these patterns are linked with improved insulin sensitivity and cardiovascular risk markers.​ - Kidney disease, gut issues or other complications may require extra tailoring: for example, potassium‑rich fruits may need limiting in advanced kidney disease or high‑FODMAP fruits in some gut conditions.​   Interaction type: Underlying conditions modify which fruits and how much are appropriate; what is safe for one person with type 2 diabetes may need adjustment for another with kidney or digestive complications.​  Short‑ vs long‑term:   - Short‑term: different conditions may change immediate tolerance to certain fruits (e.g. bloating, potassium handling).​ - Long‑term: a fruit pattern aligned with your broader health issues can support better overall outcomes, not just glucose.​   **Common oversimplifications to avoid**   - “People with diabetes should avoid all fruit.” In reality, guidance from diabetes charities and clinics is that fruit is encouraged in recommended portion sizes, spread through the day.​ - “Only berries are safe; all other fruit is bad.” Berries are excellent choices, but many other fruits (apples, pears, citrus, peaches, plums, cherries, kiwi, even moderate portions of grapes and tropical fruits) can fit within a structured plan.​ - “If it is ‘natural sugar’ in fruit, it does not affect blood sugar.” Fruit carbohydrates still raise blood glucose; total grams of carbohydrate and form (whole vs juice) are what matter, not whether sugar is “natural”.​ - “Low‑carb fruit can be eaten in unlimited amounts.” Even lower‑carb fruits (like berries or avocado) contribute calories and carbohydrate; large amounts can still affect glucose and weight over time.​ - “Glycaemic index alone tells you if a fruit is safe.” GI is useful, but glycaemic load (portion size), meal context, and individual response are just as important.​   If you want, a next step could be to map out a day’s eating pattern that includes specific fruit types and portion sizes tailored to your usual medications and meal times. |
| Scenario 4 (Lay) Diabetes medication and weight gain in type 2 diabetes *Mediation* | A. Baseline additive | “Why do some type 2 diabetes medicines cause weight gain?” | Some type 2 diabetes medicines cause weight gain mainly because they increase how much usable glucose (energy) your body keeps instead of losing it in the urine, often by raising insulin levels or sensitivity, and sometimes by increasing appetite or fluid retention. This extra stored energy and fluid shows up on the scale even if you have not changed what you eat very much.​  **Key mechanisms**   - More insulin action = more calorie storage. Insulin and drugs that increase insulin release (like sulfonylureas) or sensitivity (like thiazolidinediones/TZDs) push glucose from the blood into cells and promote fat storage, so fewer calories are lost in urine and more are stored in fat and liver. As blood sugars improve, the body effectively “recaptures” calories that were previously being lost through glycosuria (sugar in the urine), which can lead to gradual weight gain.​ - Reduced glycosuria (less sugar lost in urine). Before treatment, high blood sugars mean excess glucose spills into the urine and is literally flushed away as calories. Once medicines control blood sugar, that glucose stays in the body instead, so total calorie balance shifts toward weight gain unless food intake or activity are adjusted.​ - Increased appetite and “defensive snacking.” Some medicines that raise insulin (especially insulin injections and sulfonylureas) can cause low or rapidly dropping blood sugars, which trigger hunger and extra eating to prevent or treat hypos. Even small, frequent snacks or drinks taken “just in case” can add enough extra calories over time to cause noticeable weight gain.​ - Fluid (water) retention. Thiazolidinediones (like pioglitazone) can cause the kidneys to retain sodium and water and can increase capillary leak, leading to edema (swelling) and a rapid increase in body weight from extra fluid rather than fat. This fluid-related gain can be several kilograms and is also why these drugs are used cautiously in people with heart failure risk.​ - Changes in fat distribution. Some drugs that improve insulin sensitivity also change where fat is stored, promoting storage in subcutaneous fat cells rather than around organs. That redistribution can increase measured body weight or visible fat in some areas, even if metabolic risk improves.​   **Medicines most often linked to gain**   - Insulin (any type). Strongly associated with weight gain, often a few kilograms in the first year, due to increased insulin action, reduced glycosuria, and more eating to prevent lows.​ - Sulfonylureas (e.g., gliclazide, glipizide, glimepiride). Stimulate the pancreas to release more insulin throughout the day, which can cause mild-to-moderate weight gain and more episodes of low or fluctuating blood sugar.​ - Thiazolidinediones (e.g., pioglitazone). Improve insulin sensitivity but are well known for weight gain from both increased fat mass and fluid retention.​   **Why not all diabetes drugs do this**   - Some medicines (like metformin, GLP‑1 agonists such as semaglutide, and SGLT2 inhibitors such as empagliflozin) are weight‑neutral or tend to cause weight loss because they reduce appetite, slow stomach emptying, or cause more glucose to be lost in the urine. Choosing or combining medicines with neutral or weight‑loss effects can help offset the weight gain from insulin‑raising drugs in many people.​   If you want, it is possible to go through your specific medication list and point out which ones are more likely to affect weight and what practical steps can reduce that effect. |
| B. Optimised additive | “Why do some type 2 diabetes medicines cause weight gain? Explain the main mechanisms involved and briefly indicate the kinds of reliable evidence typically used to support such explanations (e.g. clinical guidelines, systematic reviews, or large observational studies).” | Several common type 2 diabetes drugs cause weight gain mainly because they increase insulin action, reduce calorie loss in the urine, and sometimes promote fluid retention or extra calorie intake to avoid low blood sugar. These mechanisms are supported primarily by randomized trials, large cohort studies, and summarized in systematic reviews and clinical guidelines.​  **Key drug classes and mechanisms**   - Insulin (all regimens)   - Improves blood sugar so less glucose is lost in urine, meaning more calories are retained, which favors weight gain.​   - Has strong anabolic effects: it promotes glucose uptake into fat and muscle, increases lipogenesis, and inhibits lipolysis and protein breakdown.​   - Risk of hypoglycemia often leads to “defensive snacking” or higher carbohydrate intake, adding extra calories.​ - Sulfonylureas and meglitinides (insulin secretagogues)   - Stimulate the pancreas to release more insulin, causing chronic hyperinsulinemia that shifts metabolism toward energy storage and fat gain.​   - Increase risk of hypoglycemia, so patients often eat more or choose rapid-acting carbohydrates to prevent or treat low sugar, raising total calorie intake.​ - Thiazolidinediones (e.g. pioglitazone)   - Improve insulin sensitivity in adipose tissue, which can increase subcutaneous fat storage even while reducing ectopic fat in liver and muscle.​   - Cause fluid retention and edema via renal sodium reabsorption and microvascular changes, adding several kilograms of weight not all due to fat.​   **Shared physiological themes**   - Positive energy balance   - Better glycemic control reduces glycosuria, so the body stops losing calories through the urine; if food intake is unchanged or increases, weight rises.​   - Fear of hypoglycemia with insulin or secretagogues drives extra snacking, producing a sustained excess of energy intake over expenditure.​ - Anabolic and appetite effects   - Elevated insulin favors nutrient storage in adipose tissue and may blunt satiety signaling in the hypothalamus in some individuals.​   - Some regimens with frequent injections (e.g. prandial or premixed insulin) are associated with more weight gain than basal-only regimens, likely reflecting more intensive insulin exposure and eating patterns around doses.​ - Fluid retention   - Thiazolidinediones promote sodium and water retention, and insulin can sometimes increase extracellular fluid volume, both contributing to scale weight gain even when fat gain is modest.​   **Types of evidence used**   - Randomized controlled trials (RCTs)   - Head‑to‑head or placebo‑controlled trials quantify average weight change over months to years for each drug and regimen, and are often pooled in meta‑analyses.​   - Insulin trials, for example, report mean weight gain of roughly 1.5–6 kg depending on type and intensity of regimen, while sulfonylurea trials show typical gains of about 2 kg.​ - Systematic reviews and meta‑analyses   - Combine many RCTs to estimate the magnitude of weight gain by class (insulin, sulfonylureas, thiazolidinediones) versus weight‑neutral or weight‑reducing agents (metformin, GLP‑1 agonists, SGLT2 inhibitors).​   - Often explore dose–response relationships and differences between regimens (e.g. basal vs premixed insulin).​ - Large observational cohorts   - Follow thousands of patients in routine care to confirm that weight gain patterns seen in trials also appear in real‑world practice and to identify predictors (e.g. baseline BMI, insulin dose).​   - Help link medication‑associated weight gain with long‑term outcomes such as cardiovascular events or treatment persistence.​ - Clinical guidelines and consensus statements   - National and international guidelines synthesize RCTs, systematic reviews, and observational data to classify agents as weight‑gaining, weight‑neutral, or weight‑reducing and to recommend weight‑centric treatment choices.​   - These documents also highlight strategies to limit medication‑associated weight gain, such as preferring weight‑neutral agents or combining insulin with drugs that promote weight loss.​ |
| C. Interaction-aware inquiry | “Why do some type 2 diabetes medicines cause weight gain? Explain this relationship by explicitly describing mediating processes, specifying the interaction type (mediation) and temporal pattern (early vs longer-term effects). Provide a step-by-step pathway explanation and explain common oversimplifications to avoid.” | Some type 2 diabetes medicines cause weight gain because they change how much insulin is around, where and how fat is stored, how hungry you feel, and how much fluid you retain, and these effects unfold over weeks to months rather than overnight. This is an example of mediation, where the drug’s primary effect on glucose (for example more insulin) indirectly causes later weight gain through intermediate physiological steps.​  **Medicines most linked to weight gain**   - Insulin (all types, especially higher doses and intensive regimens).​ - Sulfonylureas and meglitinides (insulin secretagogues that make the pancreas release more insulin).​ - Thiazolidinediones (TZDs, such as pioglitazone).​   These contrast with medicines like metformin, GLP‑1 agonists and SGLT2 inhibitors, which are largely weight‑neutral or weight‑reducing.​  **Mediation: how “more insulin” leads to weight gain**  Here the interaction type is mediation: the medicine changes insulin biology, which then drives weight change over time.  **Step‑by‑step pathway: insulin and secretagogues**  Early phase (first weeks):   1. Drug increases circulating insulin (either injected insulin or extra insulin secretion from sulfonylureas/meglitinides).​ 2. More insulin rapidly lowers blood glucose, which reduces urinary glucose loss (less “calories lost in urine”).​ 3. Hypoglycemia or rapid drops in glucose trigger hunger and defensive eating to “fix lows,” often with fast‑acting carbohydrates.​   Longer‑term (months to years): 4. Persistently higher insulin promotes anabolic metabolism:   - Increases glucose uptake into fat cells and muscle. - Stimulates lipid uptake and storage while inhibiting lipolysis (fat breakdown).​  1. The body now retains calories that previously were lost in urine, and excess carbohydrate is efficiently stored as fat.​ 2. Recurrent hypoglycemia, or fear of it, can lead to habitual extra snacking or keeping glucose “a bit high,” further increasing energy intake.​ 3. Weight gain tends to correlate with insulin dose intensity and more aggressive regimens (premixed or full basal–bolus vs basal‑only).​   So the medicine does not “inject fat”; instead it increases insulin exposure, which mediates increased calorie retention, fat storage, and sometimes higher food intake, and that sequence creates weight gain over time.​  **Mediation: how TZDs (pioglitazone, etc.) cause weight gain**  TZDs provide a clearer example of structural mediation through adipose tissue biology.  Early phase (first weeks):   1. TZDs activate PPAR‑gamma in fat cells, increasing insulin sensitivity in adipose tissue and other organs.​ 2. This promotes differentiation of new adipocytes (more, smaller “healthier” fat cells) and improves glucose uptake into fat.​ 3. Fluid retention (sodium and water retention) can cause a fairly quick 1–2 kg gain, largely from edema, not fat.​   Longer‑term (months): 4. Over months, there is an increase in subcutaneous fat mass even while visceral (deep abdominal) fat may decrease, representing a redistribution rather than pure “central fat loading.”​ 5. Lower leptin levels and improved insulin action may increase appetite in some people, which mediates higher caloric intake.​ 6. Net effect in trials is typically about 2–4 kg weight gain after several months, a mix of added fat mass and fluid.​  Here the drug’s primary target (PPAR‑gamma and insulin sensitivity) mediates downstream changes in fat cell number, fluid balance, and appetite, which then drive later weight gain.​  **Early vs longer‑term patterns**   - Early (weeks):   - Less glucose lost in urine once glucose control improves, so more calories are retained.​   - Fluid retention (especially with TZDs) adds weight quickly but is not fat.​   - Hypoglycemia‑driven eating and rebound snacking are most prominent when doses are being adjusted.​ - Longer‑term (months+):   - Chronic hyperinsulinemia favors fat storage and inhibits fat breakdown.​   - Appetite patterns may shift if people routinely eat to avoid lows or if hormonal signals (like leptin) change.​   - Adipose tissue remodeling (more subcutaneous fat with TZDs) gradually increases measured body weight.​   These processes are cumulative; small daily changes in calorie balance and fat metabolism mediated by the drug’s effects add up to noticeable weight gain over months.  **Common oversimplifications to avoid**   1. “The medicine directly makes you fat.”    - The drug changes insulin levels, fluid handling, and adipose biology; those changes mediate weight gain via energy retention and storage, not by adding mass from nowhere.​ 2. “Weight gain means the drug is harmful overall.”    - Improved glycemic control from these medicines can markedly reduce microvascular risks even if weight increases slightly, so the net clinical effect may still be beneficial in many people.​ 3. “All diabetes drugs cause weight gain.”    - Several major classes (metformin, SGLT2 inhibitors, GLP‑1/GIP agonists, amylin analogues) are weight‑neutral or weight‑reducing and are now often preferred when weight is a concern.​ 4. “Weight gain is only water.”    - Fluid retention is important for TZDs and early insulin use, but long‑term increases largely reflect increased fat mass and energy retention.​ 5. “If weight goes up, calories in and out are all that matter.”    - The calorie balance equation still holds, but these drugs change the mediating biology of appetite, energy loss in urine, and fat storage, so the same intake and activity pattern can lead to different weight trajectories.​   Thinking in terms of mediated pathways—drug → insulin/adipose/fluid changes → appetite, energy loss, fat storage → gradual weight gain—captures the relationship more accurately than viewing weight gain as a simple, direct side effect. |
