# Supplementary material
Source: Research Square preprint supplement (doi:10.21203/rs.3.rs-8707900/v1)
Supplement: Supplementary file 3 [file 80d145e33d9dc5dc8bd2d069.docx]

**Interaction Aware Inquiry Design for Hyper Personalised Healthcare**

Marzena Nieroda1, Philip Treleaven2

1UCL Global Business School for Health, 2UCL Computer Science.

## **Supplementary Background Section**

## 1. Data and AI Foundations for Hyper-Personalised Health

Hyper-personalised health depends on reasoning across heterogeneous evidence rather than analysing domains in isolation. Recent advances in data infrastructure and artificial intelligence make such cross-domain reasoning increasingly feasible but also change how health questions are posed: when access is mediated through natural-language systems, inquiry is increasingly specified through prompts, and the structure of the question becomes a primary determinant of what can be inferred.

An illustration of this shift is provided by the Open Health platform [1-2], which exemplifies how emerging data and AI infrastructures increasingly mediate access to distributed health evidence in hyper-personalised settings. Existing solutions for collaborative health research typically fall into three architectural categories:

- **Shared database platforms** (data lakes): centralise data into repositories to enable large-scale analysis, but face persistent challenges related to privacy, data sovereignty, and cross-jurisdictional governance [3].
- **Trusted Research Environments** (TREs): provide secure, audited access to sensitive data, but remain institutionally siloed and difficult to integrate across datasets and domains [3-4].
- **Federated Computing** approaches: enable computation to occur where data reside, supporting multi-partner analytics without centralising raw data [3,5].

Open Health adopts the Federated Computing paradigm, operationalising it through an orchestration layer structured around four pillars:

- **Distributed data assets**: data remain under local institutional stewardship.
- **Federated services**: analytics and learning are executed at source, with only approved outputs exchanged.
- **Standards-based APIs**: interoperable interfaces enable integration across heterogeneous systems.
- **Governance-as-code**: access, consent, and data-use policies are enforced at runtime through federated orchestration.

Together, these capabilities illustrate how contemporary infrastructures increasingly enable joint interrogation of heterogeneous health data, while also foregrounding a critical implication for AI-mediated health reasoning: as access to multi-domain evidence becomes mediated through platforms and natural-language interfaces, the formulation of health inquiry itself—rather than data availability or model capability—becomes a central determinant of what can be inferred. This motivates the focus of the following sections on the structure of multi-domain health evidence and its implications for prompt-based inquiry.

### 1.1 Multi-Domain Data Foundations for Hyper-Personalised Health

Hyper-personalised health requires the integration of heterogeneous data capturing complementary determinants of health across biological, clinical, behavioural, social, environmental, and life-course dimensions [6]. Each domain contributes distinct information—ranging from molecular mechanisms and clinical trajectories to lived experience and contextual exposures—that becomes informative only when considered in relation to others.

As summarised in Table 1, large-scale datasets spanning these domains are now well established across population cohorts, healthcare systems, and administrative sources. Importantly, these data are rarely co-located. Although such data are abundant, they remain fragmented across institutions, purposes, and legal–ethical regimes, historically limiting integrated analysis less through data scarcity than through constraints on joint use [3,7].

**Table 1.** Key data domains supporting precision and hyper-personalised health

| Data Domain | Description | Dataset Examples |
| --- | --- | --- |
| Genomics | Genetic and molecular information describing inherited variation, gene expression, and biological pathways influencing disease risk, treatment response, and progression. | UK Biobank (genotyping & sequencing); 100,000 Genomes Project; The Cancer Genome Atlas (TCGA) |
| Clinical (EHR) | Routinely collected healthcare data including diagnoses, laboratory results, medications, procedures, and clinical outcomes recorded in electronic health records. | NHS England Data Services Platform; MIMIC-IV; CPRD (UK Clinical Practice Research Datalink) |
| Imaging | Medical imaging data used for diagnosis, monitoring, and risk stratification, often requiring specialised analytical methods. | UK Biobank imaging cohort; NIH ChestX-ray datasets; ADNI (Alzheimer’s Disease Neuroimaging Initiative) |
| Physiological & Wearables | Continuous or high-frequency measurements of physiological signals such as heart rate, activity, sleep, and glucose levels, often collected outside clinical settings. | Fitbit/Apple Health research datasets; Open mHealth |
| Behavioural & Lifestyle | Data describing health-related behaviours such as diet, physical activity, smoking, alcohol use, and adherence to treatment. | UK Biobank lifestyle surveys; NHANES; Health Survey for England |
| Social & Socioeconomic | Information on education, income, occupation, housing, social networks, and neighbourhood conditions that shape health risk and outcomes. | Census data (ONS); Index of Multiple Deprivation (IMD); Understanding Society (UK Household Longitudinal Study) |
| Environmental | Exposures related to air quality, climate, green space, noise, and built environment that influence population and individual health. | DEFRA air quality data; Copernicus Climate Data; |
| Life-course & Longitudinal | Long-term follow-up data capturing how health, exposures, and social conditions evolve over time, enabling temporal and causal analysis. | Birth cohort studies (e.g., ALSPAC); Whitehall II; UK Biobank longitudinal follow-up |

Recent advances in privacy-preserving machine learning and federated computing increasingly enable analysis across distributed datasets without centralising sensitive records, reducing long-standing legal and organisational barriers to multi-domain inquiry [3,5]. Regulatory initiatives, including European frameworks for secondary health data use, further reinforce this shift toward computation-to-data paradigms [2].

Taken together, these developments indicate that the feasibility constraint in hyper-personalisation is shifting from whether relevant data exist to how heterogeneous evidence is framed, linked, and interpreted in response to questions.

### 1.2 AI and Large Language Models as Interfaces to Health Evidence

Alongside expanded data availability, advances in machine learning (ML) have transformed how health evidence can be analysed and accessed. Within this paper, ML approaches are broadly distinguished between classic ML and generative artificial intelligence.

- **Classic ML**: methods rely on structured data, feature engineering, and discriminative learning. They remain foundational for prediction, classification, and forecasting tasks in health research, but depend heavily on predefined assumptions about which variables matter and how relationships should be specified.
- **Generative AI**: focuses on producing new content—such as text, images, or code—rather than solely extracting patterns from curated datasets.

Large language models (LLMs) represent a prominent subset of generative AI designed for language-based interaction. Trained on large-scale textual data and contextual information, LLMs use transformer-based architectures to learn relationships between tokens and contexts, enabling sophisticated natural-language understanding and generation [8]. While transformers describe a class of model architectures, LLMs refer specifically to large-scale generative systems built upon them.

As summarised in Table 2, the distinction between classic ML and generative AI is not only technical but also interactional. Classic approaches typically operate on predefined analytical tasks, whereas LLMs increasingly function as interfaces that mediate access to complex data and analytical processes. In health contexts, this positions LLMs as potential enablers of multi-domain synthesis and reasoning, lowering technical barriers to engaging with distributed evidence.

**Table 2:** Comparison of Classic ML and Generative AI

| Feature | Classic ML | Generative AI/LLMs |
| --- | --- | --- |
| Primary Function | Extract relevant features from curated datasets | Generative content creation |
| Focus | Natural language processing etc. | Generating new content (text, images, etc.) |
| Examples | Recommendation, forecasting | Text generation, image generation, etc. |
| Key Concept | ML, neural networks | LLMs (e.g. NLP), World models |

The technical foundations of LLMs build on several key developments:

- **Artificial neural networks (ANNs)**: which learn by adjusting weighted connections between layered nodes [9-10].
- **Deep learning**: which extends ANNs through multi-layered architectures capable of learning hierarchical representations [11].
- **Natural language processing (NLP)**: enabling machines to work with human language through processes such as tokenisation [12-14].
- **Transformer models**: which enable learning of long-range contextual dependencies and underpin modern LLMs [15-17].

Together, these advances have substantially improved the capacity of LLMs to interact with complex and distributed health data. However, advances in model architecture, optimisation, and retrieval operate downstream of task specification. LLMs assume that questions already encode relevant domains, relationships, and temporal scope. Consequently, improvements in AI capability alone do not ensure that health inquiry is structured in ways that reflect the interactional nature of health phenomena.

### 1.3 LLM Prompt Optimization

Large language models (LLMs) are typically accessed through prompt-based interaction, making prompt design a central determinant of system behaviour and output quality. Within the literature, two related but distinct approaches are commonly discussed: prompt engineering and prompt optimisation.

Prompt engineering refers to the manual or human-guided process of designing prompts to elicit improved responses from LLMs. A recent systematic survey identifies 58 text-based prompting techniques (and a further 40 multimodal techniques), illustrating the breadth of strategies available without modifying model parameters [18]. These techniques are commonly grouped into broad categories.

- **Basic prompting** approaches include zero-shot and few-shot prompting, where models are asked to perform tasks either without examples or with a small number of demonstrations.
- **Reasoning-oriented prompting** approaches include Chain-of-Thought (CoT), Tree-of-Thought, and ReAct, which encourage models to articulate intermediate reasoning steps rather than producing immediate answers. Chain-of-Thought prompting has been shown to improve reasoning performance and interpretability on complex tasks [19].

Prompt optimisation extends beyond manual design by treating prompting as a systematic optimisation problem. Rather than relying solely on human intuition, optimisation approaches use algorithmic methods—such as automated prompt generation, ensembling, self-consistency, or LLM-as-optimizer frameworks—to iteratively refine prompts against performance criteria [20-21]. In practice, prompt optimisation often builds directly on prompt engineering techniques, automating their selection and evaluation at scale.

While the two terms are sometimes used interchangeably, the distinction is analytically useful. Prompt engineering emphasises human-crafted prompt design, whereas prompt optimisation emphasises systematic or automated improvement of prompts under fixed task definitions. Table 3 summarises the key differences between these approaches as they are commonly defined in the literature.

**Table 3:** The differences between prompt engineering and prompt optimisation

| Aspect | Prompt Engineering | Prompt Optimization |
| --- | --- | --- |
| Definition | The manual (or human-guided) process of designing, crafting, and refining prompts to elicit better responses from LLMs. It relies on human intuition, best practices, and trial-and-error. | The systematic improvement of prompts, often encompassing both manual refinement and (more commonly) automatic/algorithmic methods to find optimal prompts. It treats prompting as an optimization problem. |
| Approach | Human-driven: Techniques like zero-shot, few-shot, Chain-of-Thought (CoT), role-playing, delimiters, structured outputs, etc. | Can be manual iteration, but primarily automated: Uses algorithms (e.g., evolutionary search, reinforcement learning, LLM-as-optimizer like OPRO or APE) to generate, evaluate, and select/refine prompts based on performance metrics. |
| Primary driver | Human intuition and domain expertise | Algorithmic search, evaluation, and selection |
| Typical techniques | Zero-/few-shot prompting, role prompts, Chain-of-Thought, structured outputs | Automatic Prompt Engineering (APE), self-consistency, prompt ensembling, OPRO |
| Degree of automation | Low to moderate | Moderate to high |
| Treatment of prompting | Craft and design activity | Optimisation problem |
| Operates under | Fixed task specification | Fixed task specification |
| Common evaluation focus | Output clarity, coherence, reasoning transparency | Accuracy, robustness, consistency, performance metrics |
| Model modification required | No | No |

## 2. Interactional Structure of Health Evidence and Implications for Inquiry

A large and diverse body of health research shows that disease risk, progression, and intervention effects are shaped by interacting determinants operating through pathways and over time, rather than by isolated or additive factors. Across epidemiology, public health, life-course research, and causal inference, this interactional structure has been repeatedly documented in relation to social conditions, behaviours, environments, and biological processes [22-26].

This section synthesises key findings from that literature to clarify what they imply for how health questions must be framed if they are to support valid interpretation. Rather than reviewing individual studies exhaustively, the focus is on recurring patterns that cut across conditions and analytic approaches, including effect heterogeneity, mediated pathways, and temporal structuring of health outcomes. Such design-oriented synthesis is well established in information systems and design science research as a way of translating empirical knowledge into actionable requirements without duplicating systematic review methods [27-28].

In parallel, we situate this synthesis alongside research on large language models (LLMs) and prompt-based interaction, which increasingly mediate access to health evidence. While this literature has focused on improving response quality under given task specifications, it has paid limited attention to whether the questions themselves reflect the interactional and temporal structure of health evidence. Together, these two strands of literature motivate a closer examination of inquiry structure as a prerequisite for hyper-personalised, AI-mediated health reasoning.

### 2.1 Interactional, Mediated, and Temporal Structure of Health Evidence

A consistent finding across health research is that outcomes depend on interacting determinants, leading to systematic variation in risk and intervention effects across populations and contexts, as illustrated in Table 4. Associations between behaviours, exposures, and health outcomes vary by socioeconomic position, material conditions, and access to healthcare, reflecting both differential exposure and differential vulnerability [26,29-30]. These patterns are particularly well documented in cardiometabolic health but are not unique to it.

**Table 4**. Illustrative examples of non-additive questioning in cardiometabolic and exposome-related epidemiology

| Study (Author, year) | Outcome | Determinant context analysed | Interaction motif demonstrated | Question structure implied | Why additive questioning fails |
| --- | --- | --- | --- | --- | --- |
| Ben-Shlomo & Kuh, 2002 | Adult chronic disease | Early-life socioeconomic conditions; adult behaviours | Temporal accumulation / critical and sensitive periods | When in the life course does exposure matter, and how do early and later exposures combine? | Collapsing exposures into a single time point erases sensitive periods, risk clustering, and cumulative disadvantage across the life course. |
| Marmot et al. 1997, Stringhini et al. 2010 | Cardiovascular disease and mortality | Socioeconomic position, behavioural and biological risk factors | Partial mediation of social gradients through behavioural pathways | Through which behavioural pathways does socioeconomic disadvantage influence disease risk? | Adjusting for behaviours treats mediators as confounders, underestimating the total effect of socioeconomic position on health outcomes. |
| Stringhini et al., 2017 | All-cause and CVD mortality | Socioeconomic position and behavioural risk factors | Social patterning of behavioural risk and mortality burden | How is behavioural risk distributed and expressed across socioeconomic strata? | Estimating average behavioural effects obscures socially patterned exposure and impact, leading to misestimation of population-level burden. |
| Schultz et al., 2018 | Cardiovascular disease outcomes | Socioeconomic context, access to care, behaviours | Contextual conditioning of risk and intervention effectiveness | Under which social and healthcare conditions do risk factors and interventions operate? | Risk estimates and interventions assume generalizability across settings despite empirically documented socioeconomic and healthcare-access heterogeneity. |
| Carroll et al., 2020 | Long-term change in BMI and waist circumference | Built-environment features and area-level socioeconomic conditions | Joint and correlated effects of multiple contextual exposures | How do co-occurring environmental and socioeconomic exposures jointly shape long-term health trajectories? | Single-factor or one-at-a-time modelling misattributes effects when built-environment features and area-level socioeconomic conditions co-vary over time. |
| Vineis et al., 2020 | Chronic disease | Environmental, social, and behavioural exposures across the life course | Temporal and interactional accumulation across exposure domains | How do multiple exposures interact and accumulate over extended time horizons? | Static models cannot represent interacting exposure trajectories, latency, and long-term accumulation processes. |
| Vermeulen et al., 2020 | Population health outcomes | Networked environmental and psychosocial exposures | Interactional (networked and mixture-based) | Which combinations of exposures co-occur and jointly shape risk? | Single-exposure effects ignore correlated, synergistic, and networked exposure structures that generate health outcomes. |

Such effect heterogeneity is not a statistical artefact but a substantive feature of health phenomena. Population-average or additive representations obscure this structure by collapsing conditional effects into a single estimate, which can misrepresent both risk and intervention effectiveness when applied across diverse contexts [24]. From the perspective of inquiry, questions that ask for a single effect size implicitly encode assumptions of homogeneity that are rarely warranted.

A closely related pattern is that many determinants influence health indirectly, through behavioural, psychosocial, or material pathways. Social and structural conditions, in particular, exert their effects via intermediate processes such as stress, diet, physical activity, and access to care, rather than through direct biological mechanisms [24,30]. Health research therefore distinguishes between effect modification—conditions under which an effect differs—and mediation—processes through which an effect operates—because this distinction is central to causal interpretation, policy relevance, and intervention design [31]. Treating mediators as independent causes, or adjusting for them without explicit causal reasoning, can obscure where effects arise and how they might be altered.

Health effects are also inherently temporal. Evidence from life-course epidemiology shows that the timing, duration, and sequencing of exposures materially shape outcomes [23]. Early-life conditions may exert delayed effects, cumulative disadvantage may amplify risk over decades, and short-term and long-term effects may differ in magnitude or direction. Exposome research further reinforces that health outcomes reflect cumulative and interacting exposures across time, rather than isolated events [25,26]. Questions that omit temporal framing implicitly assume immediacy and reversibility—assumptions that are often inconsistent with the evidence.

Taken together, this literature implies that valid health inquiry must encode three structural properties: conditionality (for whom and under what conditions effects differ), pathway structure (whether determinants act directly or through mediating processes), and temporal framing (the relevant time horizon, accumulation, and sequencing of effects). These properties arise from the structure of health evidence itself. When they are not specified at the level of inquiry, downstream reasoning—whether statistical or AI-mediated—defaults to additive, static, and context-free interpretations that misrepresent the underlying phenomena [22,24].

### 2.2 Why Prompt-Based AI Inquiry Fails to Encode Health Evidence Structure

Large language models increasingly mediate access to health evidence through natural-language interaction, making prompting a mechanism for inquiry specification [8]. A growing literature examines prompt optimisation, retrieval-augmented generation, and agentic workflows to improve coherence, transparency, and factual grounding under fixed task definitions [19,32]. Related work evaluates question-asking and information-seeking behaviour as system capabilities in conversational health AI [33-34]. Representative approaches from this literature are summarised in Table 5.

**Table 5**. Implicit epistemic assumptions and exposed limits in dominant LLM optimisation approaches

| Technique (Author, year) | Optimisation focus | What improves | Implicit epistemic assumption about the question | Interactional limits exposed |
| --- | --- | --- | --- | --- |
| Wei et al., 2022 | Chain-of-thought prompting | Reasoning transparency and coherence | The question already encodes the relevant causal, conditional, and temporal assumptions. | Improves reasoning only within the structure of the question posed; additive or mis-specified questions remain uncorrected. |
| Lewis et al., 2020 | Retrieval-augmented generation (RAG) | Factual grounding | The structure of the question is appropriate for the evidence retrieved. | Retrieval does not supply missing conditional, pathway-based, or temporal framing required for valid inference. |
| Singhal et al., 2023 | Medical LLM benchmarking | Expert-level answer synthesis | Benchmark questions correctly represent the clinical reasoning problem. | Strong benchmark performance can mask structurally inadequate or incomplete clinical questions. |
| Nori et al., 2023 | Medical reasoning evaluation | Capability assessment | Questions accurately encode real-world clinical reasoning demands. | Correct answers may be produced to ill-posed or oversimplified questions. |
| Wang et al., 2023 | Agentic LLMs | Planning, tool use, iterative execution | The initial task objective is epistemically valid. | Agents optimise execution within a fixed objective and do not evaluate whether the objective reflects correct causal or interactional structure. |
| Sahoo et al., 2024 | Prompt engineering taxonomies | Task execution quality | Determinant domains and interaction scope are already defined. | Prompt variation optimises performance within a fixed framing and does not surface missing domains, mediators, or interactions. |
| Gao et al., 2024 | RAG surveys and evaluation | Retrieval relevance | Retrieval relevance is a sufficient proxy for inferential relevance. | Retrieved evidence may not align with the interaction logic (conditionality, mediation, temporality) required by the question. |

From the perspective of health inquiry, however, this literature addresses only part of the problem. Prompt optimisation techniques operate downstream of inquiry formulation and generally assume that the underlying health question is already epistemically well formed. They focus on improving how models respond to a task, rather than on whether the task itself encodes the interactional, mediated, and temporal assumptions required by health evidence.

As a result, prompt-based inquiry typically leaves key structural assumptions implicit. Unless explicitly instructed otherwise, prompts tend to assume additive relationships, direct causation, and immediate effects. In domains where interaction, mediation, and temporality are central, this can lead LLMs to generate fluent and plausible responses that nonetheless obscure heterogeneity, misrepresent pathways, or flatten time into an implicit “average present”.

**2.3 Expert and Lay Users as Distinct Problem-Formers**

The consequences of underspecified inquiry are amplified by differences in epistemic role. Hyper-personalised health serves stakeholders who engage with evidence for fundamentally different purposes, even when drawing on the same underlying knowledge base. Expert stakeholders—such as clinicians, public health professionals, and policymakers—typically seek population- or system-level explanations of heterogeneity, causal pathways, and transferability across contexts and time horizons. Lay users engage with the same evidence primarily for person-level sensemaking: understanding when general guidance depends on conditions and identifying common oversimplifications, without implying personalised clinical decisions.

Both roles require interaction-aware reasoning, but they instantiate the same inquiry requirements differently. Expert-facing inquiry prioritises causal structure, effect modification across groups, and evidentiary interpretation. Lay-facing inquiry prioritises conditional applicability, bounded interpretation, and communication that avoids unsafe generalisation. Prompt-based interaction standardises question framing and provides little support for accommodating these role-dependent differences in problem formation.

**References**

1. Fenoglio, E., & Treleaven, P. (in press). Federated computing: Information integration under sovereignty constraints. *Royal Society Open Science*.
2. Nieroda, M., Fenoglio, E., Kalogeropoulos, D., Śmietanka, M., & Treleaven, P. (2026). *Open health platform: Federated computing and data for new knowledge creation*. SSRN. <https://doi.org/10.2139/ssrn.6033536>
3. Li, L., Back, E., Lee, S., Shipley, R., Mapitse, N., Elbe, S., … Li, L. (2025). Balancing risks and opportunities: Data-empowered-health ecosystems. *Journal of Medical Internet Research, 27*, e57237. <https://doi.org/10.2196/57237>
4. Kavianpour, S., Sutherland, J., Mansouri-Benssassi, E., Coull, N., & Jefferson, E. (2022). Next-generation capabilities in trusted research environments: Interview study. *Journal of Medical Internet Research, 24*(9), e33720. <https://doi.org/10.2196/33720>
5. Fenoglio, E., & Treleaven, P. (2025). *Federated computing: A data-driven business infrastructure*. SSRN. <https://doi.org/10.2139/ssrn.5218039>
6. Tan, M. J. T., Kasireddy, H. R., Satriya, A. B., Karim, H. A., & AlDahoul, N. (2025). Health is beyond genetics: On the integration of lifestyle and environment in real time for hyper-personalized medicine. *Frontiers in Public Health, 12*, 1522673. <https://doi.org/10.3389/fpubh.2024.1522673>
7. Goldacre, B., & Morley, J. (2022). *Better, broader, safer: Using health data for research and analysis*. Department of Health and Social Care. <https://assets.publishing.service.gov.uk/media/624ea0ade90e072a014d508a/goldacre-review-using-health-data-for-research-and-analysis.pdf>
8. Menon, P. (2023). *Introduction to large language models and the transformer architecture*. Medium. <https://rpradeepmenon.medium.com/introduction-to-large-language-models-and-the-transformer-architecture-534408ed7e61>
9. McCulloch, W., & Pitts, W. (1943). A logical calculus of the ideas immanent in nervous activity. *Bulletin of Mathematical Biophysics, 5*, 115–133. <https://doi.org/10.1007/BF02478259>
10. Rumelhart, D. E., Hinton, G. E., & Williams, R. J. (1986). Learning representations by back-propagating error. *Nature, 323*(6088), 533–536. <https://www.nature.com/articles/323533a0>
11. LeCun, Y., Bengio, Y., & Hinton, G. (2015). Deep learning. *Nature, 521*(7553), 436–444. <https://www.nature.com/articles/nature14539>
12. Grefenstette, G. (1999). Tokenization. In H. van Halteren (Ed.), *Syntactic wordclass tagging* (pp. 117–133). Springer. <https://doi.org/10.1007/978-94-015-9273-4_9>
13. Hirschberg, J., & Manning, C. D. (2015). Advances in natural language processing. *Science, 349*(6245), 261–266. <https://pubmed.ncbi.nlm.nih.gov/26185244/>
14. DeepLearning.AI. (2023). *A complete guide to natural language processing*. <https://www.deeplearning.ai/resources/natural-language-processing/>
15. Vaswani, A., Shazeer, N., Parmar, N., Uszkoreit, J., Jones, L., Gomez, A. N., Kaiser, L., & Polosukhin, I. (2017). Attention is all you need. *Advances in Neural Information Processing Systems, 30*. <https://proceedings.neurips.cc/paper_files/paper/2017/file/3f5ee243547dee91fbd053c1c4a845aa-Paper.pdf>
16. Devlin, J., Chang, M.-W., Lee, K., & Toutanova, K. (2019). BERT: Pre-training of deep bidirectional transformers for language understanding. *Proceedings of the 2019 Conference of the North American Chapter of the Association for Computational Linguistics (NAACL-HLT)*. <https://arxiv.org/abs/1810.04805>
17. Lin, T., Wang, Y., Liu, X., & Qiu, Z. (2021). A survey of transformers. *arXiv*. <https://arxiv.org/abs/2106.04554>
18. Schulhoff, S., Ilie, M., Balepur, N., Kahadze, K., Liu, A., Si, C., … Resnik, P. (2024). *The Prompt Report: A systematic survey of prompting techniques*. arXiv. <https://doi.org/10.48550/arXiv.2406.06608>
19. Wei, J., Wang, X., Schuurmans, D., Bosma, M., Ichter, B., Xia, F., Chi, E., Le, Q. V., & Zhou, D. (2022). Chain-of-thought prompting elicits reasoning in large language models. *Advances in Neural Information Processing Systems, 35*, 24824–24837. <https://arxiv.org/abs/2201.11903>
20. Wang, W., Dong, L., Cheng, H., Liu, X., Yan, X., Gao, J., & Wei, F. (2023). Augmenting language models with long-term memory. *arXiv*. <https://arxiv.org/abs/2306.07174>
21. Wang, L., Ma, C., Feng, X., Zhang, Z., Yang, H., Zhang, J., Chen, Z., & others. (2024). A survey on large language model-based autonomous agents. *Frontiers of Computer Science, 18*(6), 186345. <https://link.springer.com/content/pdf/10.1007/s11704-024-40231-1.pdf>
22. Engel, G. L. (1977). The need for a new medical model: A challenge for biomedicine. *Science, 196*(4286), 129–136. <https://doi.org/10.1126/science.847460>
23. Ben-Shlomo, Y., & Kuh, D. (2002). A life course approach to chronic disease epidemiology: Conceptual models, empirical challenges and interdisciplinary perspectives. *International Journal of Epidemiology, 31*(2), 285–293. <https://doi.org/10.1093/ije/31.2.285>
24. Krieger, N. (2005). Embodiment: A conceptual glossary for epidemiology. *Journal of Epidemiology & Community Health, 59*(5), 350–355. <https://doi.org/10.1136/jech.2004.024562>
25. Wild, C. P. (2005). Complementing the genome with an “exposome”: The outstanding challenge of environmental exposure measurement in molecular epidemiology. *Cancer Epidemiology, Biomarkers & Prevention, 14*(8), 1847–1850. <https://doi.org/10.1158/1055-9965.EPI-05-0456>
26. Vineis, P., Robinson, O., Chadeau-Hyam, M., Dehghan, A., Mudway, I., & Dagnino, S. (2020). What is new in the exposome? *Environment International, 143*, 105887. <https://doi.org/10.1016/j.envint.2020.105887>
27. Hevner, A. R., March, S. T., Park, J., & Ram, S. (2004). Design science in information systems research. *MIS Quarterly, 28*(1), 75–105. <https://www.jstor.org/stable/25148625>
28. Gregor, S., & Hevner, A. R. (2013). Positioning and presenting design science research for maximum impact. *MIS Quarterly, 37*(2), 337–355. <https://doi.org/10.25300/MISQ/2013/37.2.01>
29. Marmot, M. G., Bosma, H., Hemingway, H., Brunner, E., & Stansfeld, S. (1997). Contribution of job control and other risk factors to social variations in coronary heart disease incidence. *The Lancet, 350*(9073), 235–239. <https://doi.org/10.1016/S0140-6736(97)04244-X>
30. Stringhini, S., Carmeli, C., Jokela, M., Avendano, M., Muennig, P., Guida, F., … Stringhini, S. (2017). Socioeconomic status and the 25 × 25 risk factors as determinants of premature mortality: A multicohort study. *The Lancet, 389*(10075), 1229–1237. <https://doi.org/10.1016/S0140-6736(16)32380-7>
31. VanderWeele, T. J. (2015). *Explanation in causal inference: Methods for mediation and interaction*. Oxford University Press.
32. Lewis, P., Perez, E., Piktus, A., Petroni, F., Karpukhin, V., Goyal, N., Küttler, H., Lewis, M., Yih, W.-T., Rocktäschel, T., Riedel, S., & Kiela, D. (2020). Retrieval-augmented generation for knowledge-intensive NLP tasks. *arXiv*. <https://arxiv.org/abs/2005.11401>
33. Chen, Y., Wang, Z., Xing, X., Xu, Z., Fang, K., Wang, J., … Xu, X. (2023). Bianque: Balancing the questioning and suggestion ability of health LLMs with multi-turn health conversations polished by ChatGPT. *arXiv*. <https://arxiv.org/abs/2310.15896>
34. Wang, Z., Li, H., Huang, D., Kim, H. S., Shin, C. W., & Rahmani, A. M. (2025). HealthQ: Unveiling questioning capabilities of LLM chains in healthcare conversations. *Smart Health*, 100570. <https://www.sciencedirect.com/science/article/pii/S2352648325000315>
