# Supplementary material
Source: Research Square preprint supplement (doi:10.21203/rs.3.rs-8707900/v1)
Supplement: Supplementary file 4 [file 9e75b9ddacb4ee5eb54e4497.docx]

Table 3. Demonstrator scenarios and inquiry conditions

Date of data collection: 06.01.2026

Platform: Gemini 3

| Scenario (user type & interaction motif) | Condition | Prompt | Results |
| --- | --- | --- | --- |
| Scenario 1 (Expert) Physical activity and type 2 diabetes risk across socioeconomic contexts *Effect modification* | A. Baseline additive | “How much does physical activity reduce the risk of type 2 diabetes?” | Physical activity is one of the most effective ways to lower your risk of developing type 2 diabetes.1 Large-scale studies and meta-analyses consistently show that even moderate amounts of movement can lead to a significant reduction in risk.2  **Risk Reduction by Activity Level**  The amount of protection you get generally follows a "dose-response" relationship—meaning the more you do, the more you benefit.3 However, the most dramatic health gains often occur when moving from being sedentary to doing even a small amount of activity.4   | **Activity Level** | **Weekly Equivalent** | **Estimated Risk Reduction** | | --- | --- | --- | | **Moderate** | 150 min (e.g., 30 min walk, 5 days/week) | **~26%** | | **High** | 300 min (e.g., 1 hour walk, 5 days/week) | **~36%** | | **Very High** | 600 min (brisk walking or vigorous sport) | **~53%** |   **Key Factors That Influence Risk**   - **Intensity Matters:** Walking speed is a strong predictor. Research suggests that walking at a "brisk" pace (above 4 km/h or 2.5 mph) is significantly more effective than a casual stroll.5 - **Combined Lifestyle Changes:** When physical activity is combined with a healthy diet and modest weight loss (5–7% of body weight), the risk reduction can jump to nearly **60%**, as shown in the landmark Diabetes Prevention Program (DPP) study.6 - **Resistance Training:** Adding strength training (lifting weights or bodyweight exercises) twice a week provides an additional **15–30%** reduction in risk, as muscle tissue is a primary site for glucose clearance. - **The "Activity Paradox":** Interestingly, physical activity during leisure time (sports, walking, gym) is highly protective, while heavy physical labor at a job does not always show the same protective benefits.7   **How It Works**  Physical activity reduces diabetes risk through several biological mechanisms:   - **Improves Insulin Sensitivity:** It helps your cells use the insulin your body already makes more effectively.8 - **Direct Glucose Uptake:** During exercise, your muscles can pull sugar from your bloodstream even without insulin.9 - **Reduces "Adiposity":** Exercise helps reduce body fat, particularly visceral fat (around the organs), which is a major driver of insulin resistance.   **Tip:** If you can't find 30 minutes at once, three 10-minute "activity snacks" (like a brisk walk after each meal) have been shown to be just as effective—and sometimes better—at managing blood sugar spikes.  **Would you like me to create a sample weekly exercise plan tailored for diabetes prevention?** |
| B. Optimised additive | “How much does physical activity reduce the risk of type 2 diabetes? Explain your reasoning step by step and briefly indicate the kinds of reliable evidence typically used to support such explanations (e.g. clinical guidelines, systematic reviews, or large observational studies).” | Regular physical activity significantly reduces the risk of type 2 diabetes (T2D).1 For most people, achieving the standard recommended levels of activity can reduce their risk by approximately **25% to 30%**, while higher levels of activity can lead to a reduction of **50% or more**.  Below is a step-by-step explanation of how this reduction occurs and the evidence supporting it.  **1. The Magnitude of Risk Reduction**  Research consistently shows a "dose-response" relationship: as you move more, your risk drops further.2   - **Moderate Activity (Standard Guidelines):** Walking briskly for 150 minutes a week (about 22 minutes a day) is associated with a **26% lower risk** of T2D compared to being inactive.3 - **High Activity:** Doubling that effort to 300 minutes a week can reduce the risk by about **36%**.4 Individuals engaging in very high levels of activity (e.g., 1 hour of vigorous exercise daily) may see a reduction of up to **53%**.5 - **Even Small Amounts Matter:** Significant benefits are observed even in people who do not meet the full 150-minute guideline but are more active than those who are entirely sedentary.6   **2. Biological Mechanisms (Step-by-Step)**  Physical activity reduces diabetes risk through several distinct physiological pathways:7   - **Step 1: Immediate Glucose Uptake:** During exercise, muscles require energy.8 They pull glucose (sugar) from the bloodstream using "insulin-independent" pathways.9 This means your muscles can lower your blood sugar even if your insulin isn't working perfectly. - **Step 2: Improved Insulin Sensitivity:** Post-exercise, the body becomes more sensitive to insulin for up to 48 hours. This allows the pancreas to produce less insulin to achieve the same blood-sugar-lowering effect, reducing "wear and tear" on insulin-producing cells. - **Step 3: Muscle Adaptation:** Regular training increases the number of **GLUT4 transporters** (gateways that let sugar into cells) and improves mitochondrial function, making the body's "engines" more efficient at burning fuel.10 - **Step 4: Reduction in Systemic Inflammation:** Adipose tissue (body fat) can release pro-inflammatory chemicals that cause insulin resistance. Physical activity reduces this chronic inflammation and helps manage visceral fat (fat around organs), which is a primary driver of T2D.   **3. Types of Evidence Used**  To reach these conclusions, scientists rely on three main pillars of evidence:   | **Evidence Type** | **What it tells us** | **Example** | | --- | --- | --- | | **Large Observational Studies** | Tracks tens of thousands of people over decades to see who develops diabetes based on their self-reported activity. | *The Nurses' Health Study* (USA) or the *InterAct Study* (Europe). | | **Randomized Controlled Trials (RCTs)** | The "gold standard." These assign people to specific exercise programs to prove cause-and-effect. | *The Diabetes Prevention Program (DPP)* found lifestyle changes (including exercise) reduced risk by **58%** in high-risk adults. | | **Systematic Reviews & Meta-Analyses** | These pool data from dozens of individual studies to provide a single, highly reliable "average" risk reduction figure. | *Aune et al. (2015)*, which analyzed over 1 million participants to confirm the dose-response relationship. |   **Clinical Guidelines**  Global health organizations, such as the **World Health Organization (WHO)** and the **American Diabetes Association (ADA)**, use this collective evidence to form public health targets.11 They currently recommend at least **150 minutes of moderate-intensity aerobic activity** plus **two days of resistance (strength) training** per week for optimal prevention.12  **Would you like me to create a sample weekly exercise plan that meets these clinical guidelines for diabetes prevention?** |
| C. Interaction-aware inquiry | “How much does physical activity reduce the risk of type 2 diabetes? Explain how this relationship differs across socioeconomic and healthcare-access contexts. Specify relevant determinant domains, the interaction type (effect modification), the time horizon (short-term vs long-term effects), and evidentiary limits. Provide 3–5 conditional ‘if–then’ statements and key uncertainties.” | Physical activity is one of the most potent non-pharmacological interventions for preventing type 2 diabetes (T2D).1 Research consistently shows a dose-response relationship where even modest increases in movement yield significant metabolic protection.2  **1. Risk Reduction Magnitude**  Systematic reviews and meta-analyses (including data updated through 2024–2025) indicate that:   - **Average Risk Reduction:** Meeting standard guidelines (150 minutes of moderate-to-vigorous physical activity (MVPA) per week) is associated with a **25–40% reduction** in T2D risk. - **High-Intensity Impact:** Comparing the most active individuals to the least active can show a risk reduction of up to **50–60%**, particularly when cardiorespiratory fitness (CRF) is high ($>12$ METs). - **Low-Volume Benefit:** Even "low-volume" activity (e.g., 15 minutes of brisk walking daily) can reduce risk by roughly **15–20%**, emphasizing that "some is better than none."   **2. Socioeconomic & Healthcare Contexts**  The relationship between physical activity and T2D is significantly influenced by **Socioeconomic Status (SES)** and **Healthcare Access**, acting through a phenomenon known as **effect modification**.3  **Determinant Domains**   | **Domain** | **Impact on Physical Activity & T2D Risk** | | --- | --- | | **Environmental** | Availability of "walkable" neighborhoods, green spaces, and safe exercise facilities. | | **Material/Economic** | Costs of gym memberships, specialized equipment, and the "time poverty" of working multiple jobs. | | **Psychosocial** | Chronic stress from financial instability can impair the biological "yield" of exercise (e.g., elevated cortisol blunting insulin sensitivity gains). | | **Healthcare Access** | Access to "Exercise is Medicine" programs, professional kinesiologists, and wearable tech for monitoring. |   **Effect Modification (Interaction Type)**  Recent studies (e.g., UK Biobank 2025) highlight an **additive interaction**:   - **Lower SES individuals** often experience a *higher* baseline risk of T2D due to poor diet and stress. - **Vulnerability:** Because their baseline risk is higher, the **absolute number of cases prevented** by increasing physical activity is significantly greater in lower-income groups than in higher-income groups. - **Constraint:** Conversely, the *barriers* to achieving that activity are higher in these contexts, leading to a "prevention paradox."   **3. Time Horizons**  The benefits of physical activity operate on two distinct biological clocks:   - **Short-Term (Acute) Effects:**   - **Duration:** 24–48 hours.   - **Mechanism:** Immediate increase in glucose transport (4$GLUT4$ translocation) into muscle cells, independent of insulin.5   - **Benefit:** Improved post-meal blood sugar levels.6 - **Long-Term (Chronic) Effects:**   - **Duration:** Months to years.   - **Mechanism:** Increased mitochondrial density, reduced systemic inflammation, and permanent changes in body composition (reduced visceral fat).   - **Benefit:** Sustained reduction in insulin resistance and preservation of pancreatic beta-cell function.7   **4. Conditional ‘If–Then’ Statements**   - **If** an individual transitions from a sedentary lifestyle to just 75 minutes of brisk walking per week, **then** their T2D risk may drop by approximately **20%**, regardless of weight loss. - **If** physical activity is performed in the afternoon or evening, **then** the improvement in insulin sensitivity may be greater than morning exercise due to circadian alignment of metabolic pathways.8 - **If** a high-risk individual has limited healthcare access, **then** community-based walking groups or "green prescriptions" become the most cost-effective clinical interventions. - **If** strength training is combined with aerobic exercise, **then** the reduction in $HbA1c$ is typically **doubled** compared to using either modality alone.   **5. Evidentiary Limits & Key Uncertainties**   - **Causality vs. Correlation:** Most large-scale data comes from observational cohorts. While the link is strong, "reverse causality" (where people with undiagnosed early-stage T2D feel too tired to exercise) can skew data. - **The "Non-Responder" Phenomenon:** A small percentage of the population shows little to no improvement in glucose metabolism following standard exercise protocols; the genetic drivers for this are not fully understood. - **Self-Reporting Bias:** Many studies rely on participants reporting their own activity levels, which often leads to overestimation of exercise and underestimation of sedentary time. - **Intersectionality:** There is a lack of long-term data on how physical activity interacts with specific ethnic-minority stressors or rural vs. urban healthcare barriers.   Would you like me to generate a personalized exercise plan template based on these clinical guidelines? |
| Scenario 2 (Expert) Socioeconomic disadvantage and type 2 diabetes risk *Mediation* | A. Baseline additive | “Why does socioeconomic status affect the risk of type 2 diabetes?” | Socioeconomic status (SES) is one of the strongest predictors of type 2 diabetes risk because it dictates the "environment of choice" in which a person lives. While genetics and age play roles, SES—typically measured by income, education, and occupation—creates a framework that either protects against or promotes the disease.  The relationship is often described as a **social gradient**: as income and education levels decrease, the risk of developing type 2 diabetes increases. Here is why this occurs:  **1. The "Food Swamp" and Nutritional Barriers**  Low SES often limits access to a balanced diet. This is driven by two main factors:   - **Affordability:** Highly processed, calorie-dense foods (high in sugar and unhealthy fats) are often significantly cheaper than fresh produce and lean proteins. - **Geography:** Lower-income neighborhoods are more likely to be **"food deserts"** (lacking grocery stores with fresh produce) or **"food swamps"** (saturated with fast-food outlets and convenience stores).   **2. Physical Environment and Safety**  Maintaining an active lifestyle is harder when your physical surroundings are unsupportive:   - **Built Environment:** Higher-SES areas typically have more parks, sidewalks, and bike paths. - **Safety Concerns:** In lower-income neighborhoods, high crime rates or poor lighting can make outdoor exercise like walking or running feel unsafe. - **Time Poverty:** People working multiple low-wage jobs or facing long commutes via public transit have less "disposable time" for intentional exercise.   **3. Chronic "Toxic" Stress**  Living in a state of financial instability or housing insecurity triggers the body’s "fight or flight" response.   - **Cortisol Production:** Chronic stress leads to sustained high levels of cortisol. This hormone can increase blood sugar levels and promote abdominal fat storage, both of which are primary drivers of insulin resistance. - **Psychosocial Load:** The mental energy required to manage poverty leaves less "cognitive bandwidth" for complex health management, such as tracking macronutrients or blood sugar.   **4. Health Literacy and Quality of Care**  Education levels directly impact how effectively a person can navigate the healthcare system.   - **Knowledge Gap:** Higher education is linked to better **health literacy**—the ability to understand and act on medical advice regarding prevention. - **Preventative Access:** Those with higher SES are more likely to have consistent health insurance and access to preventative screenings, catching "prediabetes" before it becomes a full-blown diagnosis. - **Adherence:** Even after a diagnosis, low SES makes it harder to afford medications (like insulin or GLP-1 agonists) and monitoring supplies.   **5. Summary of Impact**  Research indicates that these social factors can account for **50% to 60%** of health outcomes. In developed nations, the risk of diabetes can be **1.5 to 2 times higher** for those in the lowest income quintiles compared to the highest.  **Would you like me to look into specific public health programs that have been successful in reducing these diabetes disparities?** |
| B. Optimised additive | “Why does socioeconomic status affect the risk of type 2 diabetes? Explain your reasoning step by step and briefly indicate the kinds of reliable evidence typically used to support such explanations (e.g. clinical guidelines, systematic reviews, or large observational studies).” | Socioeconomic status (SES)—typically measured by income, education, and occupation—is one of the most powerful predictors of type 2 diabetes (T2D) risk. Research consistently shows that individuals in the lowest SES brackets are **1.5 to 2.5 times** more likely to develop the condition compared to those in the highest brackets.  This relationship is not caused by a single factor but is the result of a "chain of risk" where social conditions translate into biological changes.  **Step-by-Step Reasoning: How SES Influences Diabetes Risk**  **1. The Physical and Built Environment**  SES dictates where a person lives. Lower-income neighborhoods are more likely to be **"food swamps"** (areas with a high density of fast food and ultra-processed options) or **"food deserts"** (areas lacking affordable fresh produce).   - **The Mechanism:** Limited access to nutritious food leads to a diet high in refined sugars and fats, which promotes insulin resistance. - **The Physical Link:** Deprived areas often lack safe green spaces or walkable infrastructure, reducing opportunities for "passive" physical activity.   **2. Psychosocial Stress and the Biological Response**  Living in low SES conditions involves chronic stressors: financial insecurity, housing instability, and precarious employment.   - **The Mechanism:** Constant stress activates the **Hypothalamic-Pituitary-Adrenal (HPA) axis**, leading to chronically elevated levels of **cortisol**. - **The Biological Impact:** High cortisol directly increases blood glucose levels and promotes abdominal fat storage, both of which are primary drivers of T2D.   **3. Health Literacy and "Cognitive Load"**  Education level influences "health literacy"—the ability to find and use health information.   - **The Mechanism:** Individuals with higher education often have more resources to navigate complex dietary guidelines and preventive screenings. - **The "Scarcity" Effect:** Behavioral scientists note that the mental energy required to manage poverty (deciding which bills to pay) creates a "cognitive load" that makes it harder to prioritize long-term health goals like exercise or meal planning.   **4. Cumulative Life-Course Exposure**  The risk is often intergenerational. Children born into low-SES households may experience "epigenetic" changes due to poor maternal nutrition or stress in the womb.   - **The Mechanism:** These early-life exposures can "program" a child’s metabolism to be more efficient at storing fat, increasing their susceptibility to diabetes decades later, regardless of their adult SES.   **Types of Evidence Used**  To support these explanations, researchers and public health officials rely on several tiers of evidence:   - **Large Observational Cohort Studies:** Studies like the *Whitehall II Study* or *NHANES* follow thousands of people over decades. They allow researchers to see how a change in income or job status precedes the onset of diabetes. - **Systematic Reviews and Meta-Analyses:** These "studies of studies" pool data from dozens of smaller trials to provide a definitive "Risk Ratio." For example, meta-analyses have quantified that low education carries a roughly **40% increased risk** of T2D. - **Clinical Guidelines:** Organizations like the *American Diabetes Association (ADA)* and *NICE (UK)* publish guidelines that synthesize this research into practical recommendations for doctors to screen at-risk populations earlier. - **Mediation Analysis:** This is a statistical method used in papers to "tease out" how much of the risk is due to BMI versus how much is due to direct stress or environmental factors.   **Would you like me to find a summary of specific clinical guidelines regarding how doctors should screen patients from lower socioeconomic backgrounds?** |
| C. Interaction-aware inquiry | “Why does socioeconomic status affect the risk of type 2 diabetes? Explain this relationship by explicitly describing mediating pathways, specifying the interaction type (mediation), temporal framing (life-course accumulation), and evidentiary limits. Provide a pathway description using arrows and explain why adjusting for mediators changes interpretation.” | Socioeconomic status (SES) acts as a "fundamental cause" of type 2 diabetes (T2D) because it dictates the distribution of risk factors across a population. This relationship is not a simple direct line; rather, it is a complex **mediation** process where SES influences more proximal (immediate) factors that eventually lead to the disease.1  **1. The Mediating Pathways**  A mediating pathway explains *how* or *why* an independent variable (SES) affects a dependent variable (T2D). In social epidemiology, these are often categorized into three major streams:   - **Behavioral Pathway:** Lower SES is associated with "food deserts" (lack of affordable fresh produce) and "activity deserts" (unsafe neighborhoods or lack of parks).2 This leads to higher rates of calorie-dense diets and sedentary behavior.3 - **Psychosocial Pathway:** The "status syndrome" suggests that the chronic stress of low social standing and financial insecurity triggers the hypothalamic-pituitary-adrenal (HPA) axis. This results in chronically elevated cortisol, which promotes insulin resistance and abdominal obesity. - **Biomedical/Material Pathway:** Lower SES limits access to preventative healthcare and health literacy.4 Furthermore, "environmental toxins" (like air pollution or noise) are more prevalent in low-income areas, which can trigger systemic inflammation.   **Pathway Description:**  **SES** $\rightarrow$ **Mediators** (Diet, Stress, BMI, Inflammation) $\rightarrow$ **Type 2 Diabetes**  **2. Interaction Type: Mediation**  The relationship is primarily defined by **mediation**. This means that if you were to "block" the mediators (e.g., if everyone had the same BMI and same stress levels), much of the diabetes risk associated with low SES would disappear.   - **Total Effect:** The raw observation that low SES correlates with T2D.5 - **Indirect Effect:** The portion of the risk that travels through the mediators (e.g., SES $\rightarrow$ Obesity $\rightarrow$ T2D). - **Direct Effect:** The remaining risk after adjusting for mediators. Studies like the *Whitehall II* cohort suggest that known mediators (BMI, smoking, activity) explain about **40% to 60%** of the social gradient, leaving a significant "unexplained" direct effect.   **3. Temporal Framing: Life-Course Accumulation**  The risk of T2D is not just about your *current* income; it is a **cumulative biological debt**.   - **Accumulation of Risk:** Socioeconomic disadvantage in childhood (e.g., food insecurity) can "program" metabolic pathways through epigenetic changes. - **Social Mobility:** Research shows that individuals who grow up in low-SES households but achieve high-SES status as adults still carry a higher risk of T2D than those who were high-SES throughout their entire lives. - **Critical Periods:** Nutritional or stressful insults during fetal development or puberty can have "long-arm" effects on adult glucose metabolism.6   **4. Why Adjusting for Mediators Changes Interpretation**  In scientific studies, researchers "adjust" for mediators (like BMI) to see if the SES-diabetes link persists.   - **If the link disappears:** It suggests the problem is entirely behavioral (e.g., "they have diabetes because they are overweight"). - **If the link remains (as it usually does):** It proves that SES exerts a "toxic" effect beyond just individual choices. It points toward structural issues like chronic stress, environmental pollution, or early-life programming that cannot be "fixed" simply by changing one's diet.   **5. Evidentiary Limits**  While the link is robust, there are significant limits to our current data:   - **Residual Confounding:** We cannot measure every single mediator (e.g., every micro-stressor or every chemical exposure), so we might overestimate the "direct" effect of SES. - **Self-Report Bias:** Most studies rely on self-reported diet and exercise, which are notoriously inaccurate and often vary by SES.7 - **Directionality:** While low SES leads to T2D, "social drift" can occur where the disability caused by diabetes leads to job loss and a subsequent drop in SES.   **Would you like me to create a table comparing how different SES indicators (like education vs. income) specifically impact these pathways?** |
| Scenario 3 (Lay) Fruit consumption and type 2 diabetes *Effect modification* | A. Baseline additive | “What fruit is safe to eat if you have type 2 diabetes?” | When you have type 2 diabetes, **no fruit is strictly forbidden**, but the way they affect your blood sugar varies significantly. The best fruits are those with a low **Glycemic Index (GI)**—meaning they digest slowly and cause a gradual rise in blood sugar rather than a sharp spike.  **🍎 Best Fruits to Eat (Low GI)**  These fruits are high in fiber and antioxidants, which help manage glucose levels.   - **Berries:** Strawberries, raspberries, blackberries, and blueberries. They are packed with fiber and have some of the lowest sugar contents. - **Stone Fruits:** Peaches, plums, and cherries. Cherries, in particular, have a very low GI (around 20). - **Apples & Pears:** Best eaten with the skin on for maximum fiber. - **Citrus:** Oranges and grapefruit. They are high in vitamin C and soluble fiber. - **Avocado:** Technically a fruit, it is very low in sugar and high in healthy fats, which can actually help stabilize blood sugar.   **⚠️ Fruits to Eat in Moderation (Higher GI/Sugar)**  These fruits can still be part of your diet but require careful portion control (usually about a half-cup or small serving).   - **Tropical Fruits:** Pineapple, mango, and papaya. - **Melons:** Watermelon and cantaloupe have higher GI scores, though their "glycemic load" is lower because they are mostly water. - **Very Ripe Bananas:** As bananas ripen, their starch turns into sugar. A firm, slightly green banana is better than a spotted brown one.   **🚫 Preparation "Red Flags"**  Sometimes it’s not the fruit itself, but how it’s processed that causes issues:   - **Fruit Juice:** Avoid most juices. They lack the fiber of the whole fruit, leading to instant blood sugar spikes. - **Dried Fruit:** Raisins, dates, and dried cranberries are highly concentrated in sugar. Two tablespoons of raisins have the same carbs as a whole small apple. - **Canned Fruit in Syrup:** Always choose fruit canned in "water" or "natural juice" rather than "heavy syrup."   **💡 Pro-Tips for Managing Spikes**   1. **Pair with Protein/Fat:** Eat your fruit with a handful of nuts, a piece of cheese, or Greek yogurt. The protein and fat slow down the absorption of the fruit's sugar. 2. **Watch the Portion:** A standard "serving" is about the size of a tennis ball or one cup of berries. 3. **Whole over Processed:** Choose the whole fruit over a smoothie. Blending breaks down the fiber, making the sugar hit your system faster.   **Would you like me to create a 7-day snack plan that incorporates these fruits with healthy proteins?** |
| B. Optimised additive | “What fruit is safe to eat if you have type 2 diabetes? Explain your answer clearly and briefly indicate the kinds of reliable evidence typically used to support such advice (e.g. dietary guidelines, systematic reviews, or large observational studies).” | If you have type 2 diabetes, **almost all fresh whole fruits are safe to eat**, provided you manage portion sizes. The key is to choose fruits that have a minimal impact on blood sugar levels while offering high nutritional value.  **Recommended Fruits**  Health experts generally categorize fruits based on their **Glycemic Index (GI)**—a ranking of how quickly a food raises blood glucose.1   - **Best Choices (Low GI):** These are digested slowly, causing a gradual rise in blood sugar.2   - **Berries:** Blueberries, strawberries, and raspberries are high in fiber and antioxidants.3   - **Stone Fruits:** Peaches, plums, and cherries.4   - **Pome Fruits:** Apples and pears (especially with the skin on for extra fiber).5   - **Citrus:** Oranges and grapefruit.6 - **Eat in Moderation (Medium/High GI):** These can cause faster spikes and should be eaten in smaller portions.   - Bananas (especially very ripe ones), pineapple, mango, and watermelon.7   **Why Whole Fruit is Safe**  Whole fruit contains **fiber**, which slows down the digestion of natural sugars (fructose).8 This is why eating a whole orange is much safer for a person with diabetes than drinking orange juice, which lacks fiber and is absorbed almost instantly into the bloodstream.  **Reliable Evidence for This Advice**  The advice to include fruit in a diabetes diet is supported by several levels of scientific evidence:   1. **Systematic Reviews and Meta-Analyses:** These are the "gold standard" of evidence. They analyze data from dozens of individual studies. For example, major meta-analyses have consistently shown that higher consumption of whole fruits (specifically blueberries, grapes, and apples) is associated with a *lower* risk of type 2 diabetes complications and better long-term glucose control (9$HbA1c$ levels).10 2. **Large Prospective Observational Studies:** Studies that follow hundreds of thousands of people over decades (like the *Nurses' Health Study*) provide evidence that eating whole fruit does not increase diabetes risk, whereas fruit juice consumption does.11 3. **National Dietary Guidelines:** Organizations like the **American Diabetes Association (ADA)** and the **British Dietetic Association (BDA)** base their official recommendations on the cumulative evidence above, consistently advising that fruit should be part of a healthy diabetes meal plan.12 4. **Clinical Trials:** Smaller controlled studies measure the immediate effect of specific fruits on blood sugar (the basis for the Glycemic Index), providing practical data on how different fruits affect insulin response.   **Would you like me to help you create a sample meal plan that incorporates these low-GI fruits into your daily routine?** |
| C. Interaction-aware inquiry | “What fruit is safe to eat if you have type 2 diabetes? Explain how the answer depends on different conditions, specifying key modifying factors (e.g. portion size, type of fruit, meal context, medication use), the interaction type (effects differ by condition), and short-term versus longer-term effects. Provide 3–5 ‘it depends’ statements and common oversimplifications to avoid.” | Almost all whole fruits are safe and beneficial for individuals with type 2 diabetes. The concern usually stems from the natural sugar (fructose) in fruit, but research consistently shows that the fiber, antioxidants, and vitamins in whole fruit outweigh the risks of its sugar content.  Whether a fruit is "safe" or "optimal" depends on how it interacts with several key modifying factors.  **Key Modifying Factors**  The impact of fruit on your blood sugar is rarely about the fruit itself and more about the **context** in which you eat it.   - **Portion Size:** A "serving" of fruit is generally 15 grams of carbohydrates. For high-sugar fruits like grapes or bananas, this might only be half a fruit, whereas for berries, it could be a full cup. Overeating even "low-sugar" fruits can lead to a significant glucose spike. - **Type of Fruit & Form:** Whole fruits are superior to juices or smoothies. Fiber in whole fruit slows sugar absorption. Dried fruits (raisins, dates) are highly concentrated; 2 tablespoons of raisins have as many carbs as a whole small apple. - **Meal Context (The "Buffer" Effect):** Eating fruit on an empty stomach causes a faster glucose spike. Pairing fruit with **protein or healthy fats** (e.g., an apple with peanut butter, or berries in Greek yogurt) creates a "buffer" that slows down digestion and blunts the rise in blood sugar. - **Medication Use:** Some fruits interact with medications. For example, **grapefruit** can interfere with certain statins (cholesterol) and blood pressure medications. Additionally, if you use fast-acting insulin, you must count fruit carbs precisely to avoid hypoglycemia or hyperglycemia.   **4 "It Depends" Statements**   1. **It depends on the ripeness:** A green-tipped banana has more "resistant starch," which digests slowly. As it ripens and turns yellow or spotted, that starch converts into simple sugar, causing a faster blood sugar spike. 2. **It depends on the "sequence":** Research suggests that eating fruit **after** a meal containing protein and vegetables (fruit as dessert) leads to a lower post-meal glucose peak than eating the same fruit first thing in the morning. 3. **It depends on the individual's "Glycemic Response":** Two people can eat the same orange and have different blood sugar reactions based on their gut microbiome, activity level, and insulin sensitivity. 4. **It depends on your activity level:** Eating fruit shortly before or after a workout is different than eating it while sedentary. Muscles use glucose for fuel during exercise, which can help clear the sugar from your blood more efficiently.   **Short-Term vs. Long-Term Effects**   - **Short-Term:** The immediate effect is a rise in postprandial (after-meal) blood glucose. This is managed by choosing fruits with a low **Glycemic Index (GI)** like berries, cherries, or apples. - **Long-Term:** Regular consumption of whole fruit is associated with **improved insulin sensitivity** and a lower risk of diabetes complications (like heart disease and stroke) due to its high antioxidant and fiber content. Long-term studies show that restricting fruit does not improve $HbA_{1c}$ levels and may actually deprive the body of essential nutrients.   **Common Oversimplifications to Avoid**   - **"Fruit is just sugar":** This ignores the "food matrix." The fiber in fruit is structurally bound to the sugar, meaning your body has to work harder to break it down compared to the "free sugar" in a soda. - **"Only eat berries":** While berries are excellent, variety is better. Different colors of fruit provide different phytochemicals that protect the kidneys, eyes, and heart. - **"Avoid sweet fruits like mangoes or grapes":** You don't need to ban them; you just need to manage the portion. Five grapes or a small slice of mango can fit into a diabetic meal plan safely.   **Would you like me to create a personalized list of fruit portion sizes that equal 15g of carbohydrates?** |
| Scenario 4 (Lay) Diabetes medication and weight gain in type 2 diabetes *Mediation* | A. Baseline additive | “Why do some type 2 diabetes medicines cause weight gain?” | It is a common frustration for people with Type 2 diabetes to find that the very medicine helping their blood sugar is also causing the number on the scale to rise. While newer classes of drugs (like GLP-1s such as Ozempic) are known for weight loss, several traditional medications are notorious for causing weight gain.  The reasons for this vary depending on how the specific medication works in your body.  **1. Insulin and Sulfonylureas: The "Energy Storage" Effect**  Insulin is a natural growth and storage hormone.1 When you take insulin or medications that force your body to produce more of it (like **Sulfonylureas**), several things happen:   - **Calorie Retention:** Before treatment, high blood sugar often meant you were losing calories through your urine (glycosuria). Once the medicine starts working, your body begins to effectively use and store those calories instead of flushing them out.2 - **Fat Storage:** Insulin signals your cells to take in glucose.3 If your muscles don't need that energy immediately, insulin helps the body store it as fat.4 - **"Defensive Snacking":** These medications carry a risk of hypoglycemia (low blood sugar).5 To prevent or treat a "crash," patients often eat extra snacks.6 Over time, these extra calories lead to weight gain.   **2. Thiazolidinediones (TZDs): The "Fat Cell" Effect**  Drugs like **Pioglitazone** (Actos) work differently.7 They don't just affect how you use sugar; they actually change how your body handles fat cells.   - **Adipogenesis:** TZDs can stimulate the creation of new fat cells, particularly under the skin (subcutaneous fat).8 Interestingly, they often move fat away from your internal organs (visceral fat) and into these safer storage areas under the skin, which is metabolically "healthier" but still shows up as weight gain. - **Water Retention:** This class of medicine can cause the kidneys to hold onto more sodium and water, leading to fluid weight (edema) rather than just body fat.   **3. Metabolic Correction (The "Catch-Up" Effect)**  When your diabetes is poorly controlled, you may actually lose weight because your body is "starving" in the midst of plenty—it has sugar in the blood but can't get it into the cells for fuel. When you start an effective medication, your metabolism stabilizes, and your body "catches up" to the weight it was meant to be at a healthy metabolic state.  **Comparison of Weight Impact**   | **Medication Class** | **Common Examples** | **Weight Effect** | | --- | --- | --- | | **Insulin** | Lantus, Humalog, Levemir | **Gain** (Anabolic/storage) | | **Sulfonylureas** | Glipizide, Glyburide | **Gain** (Increased insulin) | | **TZDs** | Pioglitazone (Actos) | **Gain** (New fat cells/fluid) | | **Biguanides** | Metformin | **Neutral/Loss** | | **SGLT2 Inhibitors** | Jardiance, Farxiga | **Loss** (Calorie excretion) | | **GLP-1 Agonists** | Ozempic, Mounjaro | **Loss** (Appetite suppression) |   **Note:** You should never stop or change your medication without consulting your doctor. If you are concerned about weight gain, they may be able to adjust your dose or switch you to a more "weight-neutral" or "weight-loss" friendly option.  **Would you like me to look up more details on the newer weight-loss friendly diabetes medications?** |
| B. Optimised additive | “Why do some type 2 diabetes medicines cause weight gain? Explain the main mechanisms involved and briefly indicate the kinds of reliable evidence typically used to support such explanations (e.g. clinical guidelines, systematic reviews, or large observational studies).” | While medications are a cornerstone of managing Type 2 Diabetes, several classes—specifically **Insulin**, **Sulfonylureas**, and **Thiazolidinediones (TZDs)**—are frequently associated with weight gain.1 This phenomenon occurs through several distinct biological and behavioral pathways.  **1. Primary Biological Mechanisms**  The weight gain seen with these drugs is generally not "random" but is a direct result of how they manipulate metabolism and energy storage.  **Anabolic Effects and Fat Storage**  Insulin is a powerful anabolic (building) hormone.2 When you take **Exogenous Insulin** or medications like **Sulfonylureas** (which force the pancreas to secrete more of your own insulin), the body’s ability to store energy increases.3   - **Lipogenesis:** Insulin stimulates the conversion of glucose into triglycerides in adipose (fat) tissue.4 - **Inhibition of Lipolysis:** It simultaneously blocks the breakdown of stored fat, making it harder for the body to use fat as fuel.   **Reduction of Glycosuria (The "Caloric Leak")**  Before starting effective medication, many patients have very high blood sugar. When blood glucose exceeds the "renal threshold," the kidneys cannot reabsorb it all, and calories are literally flushed out in the urine (glycosuria).   - **The Shift:** Medications lower blood sugar levels back below this threshold. This stops the "leak," meaning the body now retains and utilizes hundreds of calories per day that it was previously losing.   **Adipocyte Remodeling (Specific to TZDs)**  **Thiazolidinediones** (like Pioglitazone) work differently. They activate a receptor called 5$PPAR\gamma$, which controls fat cell production.6   - **Mechanism:** They trigger **adipogenesis** (the creation of new, small fat cells) and redistribute fat from "dangerous" areas like the liver and heart to subcutaneous areas (under the skin).7 While this improves insulin sensitivity, it results in an overall increase in fat mass and sometimes fluid retention.8   **2. Behavioral and Physiological Triggers**  **Defensive Snacking (The Hypoglycemia Factor)**  Sulfonylureas and Insulin can cause blood sugar to drop too low (**hypoglycemia**).9   - **Behavior:** Patients often engage in "defensive eating"—consuming extra calories to treat or prevent a "crash."10 - **Hunger Signals:** Hypoglycemia triggers intense physiological hunger, leading to overconsumption of calories beyond what is needed for weight maintenance.11   **3. Evidence Supporting These Mechanisms**  Scientific consensus on these mechanisms is derived from several high-quality tiers of medical evidence:   | **Evidence Type** | **Purpose & Impact** | | --- | --- | | **Systematic Reviews & Meta-Analyses** | These provide the strongest evidence. For example, Cochrane reviews have quantified that patients starting insulin may gain an average of 3–9 kg in the first year. | | **Clinical Guidelines** | Organizations like the **ADA (American Diabetes Association)** and **EASD** publish annual standards of care that categorize drugs by their "weight effect" (e.g., weight-gain, weight-neutral, or weight-loss). | | **Large Observational Studies** | Landmark trials like the **UKPDS (UK Prospective Diabetes Study)** tracked thousands of patients over decades, providing real-world data on the long-term weight trajectories associated with different therapies. |   **Would you like me to create a comparison table showing which newer diabetes medications (like GLP-1s or SGLT2s) actually promote weight loss instead?** |
| C. Interaction-aware inquiry | “Why do some type 2 diabetes medicines cause weight gain? Explain this relationship by explicitly describing mediating processes, specifying the interaction type (mediation) and temporal pattern (early vs longer-term effects). Provide a step-by-step pathway explanation and explain common oversimplifications to avoid.” | Understanding the relationship between Type 2 Diabetes (T2D) medications and weight gain requires looking past the simple "calories in vs. calories out" model. Instead, it involves understanding how altering glucose metabolism and insulin levels changes how the body stores energy.  Certain medications—specifically **Sulfonylureas**, **Thiazolidinediones (TZDs)**, and **Insulin**—utilize biological pathways that favor fat accumulation.  **The Core Mechanism: Mediological Processes**  The primary relationship here is **mediation**. The medication does not contain calories that cause weight; rather, the medication triggers physiological changes (the mediators) that result in a positive energy balance.  **1. The Anabolic Mediator (Insulin Signaling)**  Insulin is an anabolic (storage) hormone.1 Medicines like Sulfonylureas work by forcing the pancreas to secrete more insulin.2   - **The Process:** Higher insulin levels signal the body to stop burning fat (lipolysis) and start storing glucose as fat (lipogenesis).   **2. The Renal Mediator (Glucose Retention)**  Before treatment, many T2D patients have very high blood sugar that "spills" into their urine (**glycosuria**). This is effectively a loss of calories.   - **The Process:** When medication successfully lowers blood sugar, those calories are no longer excreted in urine; they are kept in the body and processed.   **Step-by-Step Pathway: From Pill to Pounds**  The following pathway illustrates how a drug like a **Sulfonylurea** or **Insulin** leads to weight gain:   1. **Increased Insulin Presence:** The drug increases circulating insulin levels regardless of immediate caloric need. 2. **Glucose Uptake:** Insulin binds to receptors on muscle and adipose (fat) cells, forcing glucose out of the bloodstream and into the cells.3 3. **Suppression of Glucagon:** High insulin suppresses glucagon, the hormone responsible for breaking down stored fat for energy. 4. **Adipocyte Expansion:** Excess glucose that isn't used for immediate movement is converted into triglycerides and stored in fat cells. 5. **Defensive Eating:** If the medication causes blood sugar to drop too low (hypoglycemia), the patient experiences intense hunger and consumes "rescue carbs," leading to a caloric surplus.   **Temporal Pattern: Early vs. Longer-term Effects**  The weight gain associated with these medications follows a distinct timeline:   | **Phase** | **Timeline** | **Primary Driver** | | --- | --- | --- | | **Early Effects** | 0–3 Months | **Fluid Retention & Caloric Capture:** The body stops losing calories through urine and, in the case of TZDs, starts retaining sodium and water. | | **Longer-term** | 6+ Months | **Adipogenesis:** Continuous high insulin levels lead to the creation of new fat cells and the enlargement of existing ones. This is a slower, structural change in body composition. |   **Common Oversimplifications to Avoid**  To truly understand this, we must move away from these two common misconceptions:   - **"The medicine is high in calories":** None of these medications have caloric value. The weight gain is entirely a result of how the drug re-programs your body’s internal fuel management. - **"It's just because the patient is eating more":** While "defensive eating" due to low blood sugar plays a role, much of the weight gain is **metabolic**. Even if a patient maintains the exact same diet, switching from a "wasting" state (high blood sugar/urine loss) to a "storage" state (insulin-driven) will cause weight gain.   **Would you like me to compare these medications with "weight-neutral" or "weight-loss" diabetes drugs like GLP-1 agonists or SGLT2 inhibitors?** |
