# Supplementary material
Source: Research Square preprint supplement (doi:10.21203/rs.3.rs-8707900/v1)
Supplement: Supplementary file 5 [file a1cbbfcdbf1e63a82b4e7656.docx]

Table 2. Demonstrator scenarios and inquiry conditions

Data collection date: 06.01. 2026

Platform: Claude

| Scenario (user type & interaction motif) | Condition | Prompt | Results |
| --- | --- | --- | --- |
| Scenario 1 (Expert) Physical activity and type 2 diabetes risk across socioeconomic contexts *Effect modification* | A. Baseline additive | “How much does physical activity reduce the risk of type 2 diabetes?” | Physical activity substantially reduces the risk of developing type 2 diabetes. Here's what the research shows:  **Overall risk reduction**: Regular physical activity can reduce type 2 diabetes risk by approximately 30-50%, with some studies showing even greater benefits for those who are most active.  **Key findings from major studies**:   - The Diabetes Prevention Program found that 150 minutes per week of moderate physical activity (like brisk walking), combined with modest weight loss, reduced diabetes risk by 58% in high-risk individuals - Even modest amounts of activity provide benefits - studies show that any regular physical activity is better than none - Both aerobic exercise (walking, cycling, swimming) and resistance training (weight lifting) are protective   **How it works**: Physical activity helps by:   - Improving insulin sensitivity, allowing cells to use glucose more effectively - Helping with weight management - Reducing abdominal fat, which is particularly linked to insulin resistance - Improving blood sugar control directly through muscle glucose uptake   **Dose-response relationship**: There's generally a dose-response effect - more activity tends to provide greater protection, though even small amounts of regular activity make a meaningful difference. The benefits appear to plateau at very high activity levels.  The protective effect is especially significant for people at high risk (those with prediabetes, obesity, or family history), though physical activity benefits everyone regardless of baseline risk. |
| B. Optimised additive | “How much does physical activity reduce the risk of type 2 diabetes? Explain your reasoning step by step and briefly indicate the kinds of reliable evidence typically used to support such explanations (e.g. clinical guidelines, systematic reviews, or large observational studies).” | I'll work through this step-by-step, explaining both what we know and how we know it.  **Step 1: Establishing the baseline relationship**  Physical activity consistently shows a **30-60% reduction** in type 2 diabetes risk in people who are moderately to highly active compared to sedentary individuals. This is one of the most robust findings in preventive health.  **Evidence basis**: This comes primarily from:   - Large prospective cohort studies (e.g., Nurses' Health Study, Health Professionals Follow-up Study) - Systematic reviews and meta-analyses pooling dozens of studies - These observational studies follow tens of thousands of people over many years, tracking activity levels and diabetes incidence   **Step 2: Understanding dose-response**  The relationship isn't all-or-nothing. There's a **dose-response gradient**:   - Even 150 minutes/week of moderate activity (the standard recommendation) reduces risk by approximately 25-30% - Higher volumes show greater benefits, up to a point - Some benefit appears even below 150 minutes/week   **Evidence basis**: Meta-analyses examining different activity levels show this graded relationship consistently across studies.  **Step 3: Causal mechanisms supporting the relationship**  Why this likely represents real causation, not just correlation:   - **Biological plausibility**: Exercise improves insulin sensitivity, reduces visceral fat, improves glucose uptake in muscles - **Randomized controlled trials** (like the Diabetes Prevention Program) show that lifestyle interventions including exercise prevent or delay diabetes by ~58% in high-risk individuals - The relationship persists after adjusting for confounders like diet, BMI, and family history   **Step 4: Translation to clinical practice**  Major clinical guidelines (American Diabetes Association, WHO, USPSTF) all recommend physical activity as a primary prevention strategy, reflecting confidence in this evidence base.  **Key evidence hierarchy for this question:**   1. **Systematic reviews/meta-analyses** - synthesizing multiple studies 2. **Large prospective cohort studies** - following populations over time 3. **Randomized controlled trials** - proving interventions work (though less common for long-term prevention) 4. **Clinical practice guidelines** - expert synthesis of all evidence   The convergence across different study designs and populations strengthens confidence that this is a true causal relationship, not an artifact of confounding. |
| C. Interaction-aware inquiry | “How much does physical activity reduce the risk of type 2 diabetes? Explain how this relationship differs across socioeconomic and healthcare-access contexts. Specify relevant determinant domains, the interaction type (effect modification), the time horizon (short-term vs long-term effects), and evidentiary limits. Provide 3–5 conditional ‘if–then’ statements and key uncertainties.” | **Physical Activity and Type 2 Diabetes Risk: A Context-Dependent Relationship**  **Magnitude of Risk Reduction**  Physical activity reduces type 2 diabetes risk by approximately **30-50%** in populations meeting recommended activity levels (150+ minutes/week of moderate-intensity activity). Meta-analyses consistently show this protective effect, with dose-response relationships indicating greater benefits at higher activity levels. However, this aggregate figure masks substantial variation across socioeconomic and healthcare contexts.  **Effect Modification Across Contexts**  **Socioeconomic Status (SES) as an Effect Modifier:**  The protective effect of physical activity operates differently depending on socioeconomic position. In higher-SES populations with good baseline health literacy, regular healthcare access, and supportive built environments (sidewalks, parks, safe neighborhoods), physical activity may reduce diabetes risk by 40-60%. The biological mechanisms (improved insulin sensitivity, reduced adiposity, better glycemic control) function optimally when complemented by dietary quality, stress management, and early detection.  In lower-SES contexts, the relationship becomes more complex. While physical activity retains protective effects, the magnitude may be attenuated to 20-35% risk reduction due to competing determinants. Food insecurity, chronic stress from economic instability, inadequate sleep from multiple jobs, and environmental exposures can diminish the metabolic benefits of activity. Additionally, occupational physical activity (manual labor) appears less protective than leisure-time activity, possibly due to different intensity patterns and recovery inadequacy.  **Healthcare Access as an Effect Modifier:**  In settings with robust healthcare access, physical activity's benefits are amplified through synergistic pathways. Regular screening enables early intervention for prediabetes, medication optimization, and behavioral counseling that reinforces activity habits. The protective effect may reach 50-60% when integrated with comprehensive care.  Conversely, in healthcare-limited contexts, undiagnosed prediabetes progresses undetected, and physical activity—while beneficial—cannot compensate for lack of medical management. Risk reduction may be limited to 25-35%, and the time horizon extends because intervention opportunities are missed during critical windows.  **Relevant Determinant Domains**  **Individual-Level Biological Domain:** Insulin sensitivity, body composition, genetic predisposition (TCF7L2 variants modulate activity effects), baseline fitness level.  **Behavioral Domain:** Activity type, intensity, duration, consistency; dietary patterns; sleep quality; stress management practices.  **Interpersonal Domain:** Social support for activity, family health norms, workplace wellness programs.  **Community/Built Environment Domain:** Walkability, recreation facilities, neighborhood safety, urban vs. rural geography, transportation infrastructure.  **Healthcare System Domain:** Access to preventive care, screening coverage, care continuity, provider counseling quality, insurance coverage for diabetes prevention programs.  **Socioeconomic Domain:** Income level, education, occupational demands, food security, housing stability, time poverty.  **Policy Domain:** Public health guidelines, urban planning policies, workplace regulations, insurance mandates for prevention.  **Interaction Type: Effect Modification**  This represents **effect modification** rather than confounding or mediation. Socioeconomic status and healthcare access modify the strength of the causal relationship between physical activity and diabetes risk. The biological protective mechanisms operate across all contexts, but their magnitude varies systematically based on the presence or absence of enabling factors (resources, knowledge, environmental support) and competing risk factors (stress, poor nutrition, environmental hazards).  **Time Horizons**  **Short-Term Effects (Weeks to 2 Years):** Improved insulin sensitivity and glucose metabolism occur within weeks of increased activity. Weight loss and improved body composition emerge over 3-12 months. These physiological changes reduce diabetes incidence measurably within 1-2 years in intervention studies.  **Long-Term Effects (5-20+ Years):** Sustained activity over decades provides cumulative protection. Prospective cohort studies tracking populations over 10-20 years show persistent risk reduction. However, the cumulative advantage principle suggests that high-SES individuals accumulate greater protection over time through sustained behavioral patterns and better health maintenance, while low-SES individuals face erosion of benefits through competing health challenges.  Critical windows exist: activity during young adulthood and middle age (when insulin resistance typically increases) may be particularly protective, but evidence on differential sensitive periods across SES groups is limited.  **Conditional If-Then Statements**   1. **If** an individual maintains 150+ minutes/week of moderate-intensity physical activity **and** has regular healthcare access with biannual screening **and** lives in a supportive built environment **and** has adequate nutrition, **then** type 2 diabetes risk reduction approaches 50-60% over 10 years. 2. **If** an individual achieves similar activity levels **but** lacks healthcare access **and** experiences chronic economic stress **and** has limited healthy food options, **then** risk reduction may be attenuated to 20-30%, with benefits potentially offset by cumulative disadvantage. 3. **If** policy interventions improve built environments in low-SES communities (adding parks, sidewalks, community centers) **and** expand healthcare access simultaneously, **then** the activity-diabetes relationship may strengthen toward population-average effects (35-45% risk reduction), though sustained multi-level intervention is required. 4. **If** an individual engages primarily in high-intensity occupational physical labor without adequate recovery **and** has poor dietary quality, **then** diabetes risk reduction may be minimal (0-15%) despite high overall energy expenditure, as occupational activity lacks the protective profile of structured leisure activity. 5. **If** diabetes prevention programs integrate behavioral counseling, subsidized gym access, and nutritional support specifically targeting low-SES populations **and** healthcare screening is coupled with these programs, **then** the equity gap in physical activity's protective effects could narrow by 30-50%, based on Diabetes Prevention Program trials.   **Key Uncertainties and Evidentiary Limits**  **Measurement Challenges:** Most evidence relies on self-reported physical activity, which introduces recall bias and social desirability bias that may differ by education level. Accelerometer studies are limited and rarely stratified by detailed SES measures.  **Causal Inference Limitations:** Observational studies dominate the literature. While RCTs (like the Diabetes Prevention Program) demonstrate causality, they often have selective recruitment that underrepresents the most disadvantaged populations. Residual confounding by unmeasured factors (genetic variants, microbiome, early-life exposures) remains possible.  **Interaction Quantification:** Few studies explicitly test statistical interactions between physical activity and SES/healthcare access with adequate power. Effect modification estimates are often inferred from stratified analyses rather than formal interaction terms, limiting precision.  **Long-Term Follow-Up Gaps:** Most intervention studies follow participants for 2-5 years. Evidence on whether activity-induced protection persists over decades in different socioeconomic contexts is sparse, particularly regarding maintenance of behavior change.  **Mechanism Specificity:** The precise pathways through which SES modifies activity's effects remain incompletely characterized. Is it primarily through co-occurring behaviors (diet, sleep), chronic inflammation from stress, healthcare utilization, or environmental toxin exposures? Mediation analyses are limited.  **Generalizability:** Most evidence comes from high-income Western countries. Applicability to different cultural contexts, urbanization levels, and healthcare systems (particularly low- and middle-income countries) is uncertain.  **Threshold Effects:** The shape of the dose-response curve may differ by context—whether there are minimum effective doses or ceiling effects remains unclear, particularly for disadvantaged populations where even modest activity may be difficult to sustain.  **Synergistic vs. Antagonistic Effects:** Whether interventions addressing multiple determinants simultaneously (activity + nutrition + stress reduction + healthcare) produce additive, synergistic, or antagonistic effects across different populations requires more research.  Understanding physical activity's protective effects against type 2 diabetes requires moving beyond population averages to recognize how structural determinants fundamentally shape who benefits most from health behaviors—a crucial consideration for equitable prevention strategies. |
| Scenario 2 (Expert) Socioeconomic disadvantage and type 2 diabetes risk *Mediation* | A. Baseline additive | “Why does socioeconomic status affect the risk of type 2 diabetes?” | Lower socioeconomic status (SES) increases type 2 diabetes risk through multiple interconnected pathways:  **Access to healthy food**: People with lower incomes often live in "food deserts" with limited access to fresh produce and whole foods, while calorie-dense processed foods tend to be cheaper and more accessible. This makes it harder to maintain a diet that prevents diabetes.  **Physical activity opportunities**: Lower-SES neighborhoods often lack safe parks, sidewalks, or recreational facilities. Combined with jobs that may involve long hours or multiple shifts, this reduces opportunities for regular exercise—a key protective factor against diabetes.  **Chronic stress**: Financial instability, job insecurity, and living in disadvantaged neighborhoods create persistent stress. Stress hormones like cortisol can increase insulin resistance and promote weight gain, particularly abdominal fat, which is strongly linked to diabetes risk.  **Healthcare access**: People with lower SES may lack health insurance, have difficulty affording medications, or face barriers to preventive care. This means prediabetes often goes undetected and untreated.  **Education and health literacy**: Limited education can affect understanding of nutrition, the importance of physical activity, and recognition of diabetes symptoms. This influences both prevention and management.  **Environmental exposures**: Lower-SES communities often face greater exposure to pollution and other environmental toxins that may contribute to metabolic dysfunction.  **Sleep disruption**: Irregular work schedules, neighborhood noise, and housing insecurity can interfere with sleep quality, which affects glucose metabolism and appetite regulation.  These factors don't operate in isolation—they compound each other, creating a cycle where socioeconomic disadvantage leads to increased diabetes risk, which can in turn worsen economic circumstances through healthcare costs and reduced work capacity. |
| B. Optimised additive | “Why does socioeconomic status affect the risk of type 2 diabetes? Explain your reasoning step by step and briefly indicate the kinds of reliable evidence typically used to support such explanations (e.g. clinical guidelines, systematic reviews, or large observational studies).” | I'll work through the main pathways linking socioeconomic status (SES) to type 2 diabetes risk.  **Step 1: Define the relationship**  Lower SES is consistently associated with higher rates of type 2 diabetes across populations. This relationship persists even after accounting for some individual risk factors, suggesting multiple interconnected mechanisms are at play.  **Evidence base**: Large population-based cohort studies and systematic reviews consistently demonstrate this gradient across countries and healthcare systems.  **Step 2: Dietary patterns and food access**  People with lower SES often have:   - Limited access to affordable fresh fruits, vegetables, and whole grains - Greater reliance on energy-dense, nutrient-poor processed foods (often cheaper per calorie) - Less time for meal preparation due to multiple jobs or demanding work schedules - Living in "food deserts" with limited grocery store access   These dietary patterns increase obesity risk and directly affect insulin resistance and glucose metabolism.  **Evidence**: Nutritional epidemiology studies, food environment research, and dietary intake surveys stratified by income/education.  **Step 3: Physical activity barriers**  Lower SES is associated with:   - Jobs requiring long hours or shift work, leaving less time/energy for exercise - Unsafe neighborhoods with limited recreational facilities - Less access to gyms or organized sports - Paradoxically, some low-SES jobs involve physical labor but not the type of sustained moderate activity that reduces diabetes risk   **Evidence**: Physical activity surveillance data, occupational health studies, and built environment research.  **Step 4: Chronic stress and physiological pathways**  Financial insecurity, job instability, housing concerns, and discrimination create chronic psychological stress, which:   - Elevates cortisol and other stress hormones that promote insulin resistance - Disrupts sleep patterns (sleep deprivation independently increases diabetes risk) - May lead to stress-related behaviors like smoking or emotional eating   **Evidence**: Psychoneuroendocrinology studies, allostatic load research, and longitudinal studies measuring stress biomarkers.  **Step 5: Healthcare access and preventive care**  People with lower SES may experience:   - Lack of health insurance or underinsurance - Reduced access to preventive screening (catching prediabetes early) - Less access to diabetes prevention programs - Lower health literacy affecting understanding of risk factors   **Evidence**: Health services research, insurance coverage analyses, and healthcare utilization studies.  **Step 6: Early life and intergenerational effects**  SES affects diabetes risk across the lifespan:   - Maternal nutrition and gestational diabetes exposure affect offspring metabolism - Childhood poverty and adverse experiences influence adult metabolic health - Educational opportunities affect health knowledge and future employment   **Evidence**: Life-course epidemiology, developmental origins research, and intergenerational cohort studies.  **Step 7: Neighborhood and environmental factors**  Lower-SES neighborhoods often have:   - Higher exposure to pollution and environmental toxins (some linked to metabolic dysfunction) - More tobacco and alcohol advertising - Higher density of fast-food outlets - Social norms that may not prioritize preventive health behaviors   **Evidence**: Geographic information system (GIS) studies, environmental health research, and multilevel modeling studies.  **The cumulative model**  These pathways don't operate independently—they interact and amplify each other. Someone facing food insecurity, chronic work stress, and limited healthcare access experiences multiple simultaneous hits to their metabolic health.  **Key evidence sources overall**:   - Systematic reviews and meta-analyses (Cochrane, major medical journals) - Long-term cohort studies (Whitehall Study, CARDIA, Framingham) - National health surveys (NHANES, national diabetes audits) - Clinical guidelines (ADA, WHO) increasingly recognize social determinants   The relationship between SES and diabetes is one of the most robust findings in social epidemiology, supported by decades of research across multiple disciplines. |
| C. Interaction-aware inquiry | “Why does socioeconomic status affect the risk of type 2 diabetes? Explain this relationship by explicitly describing mediating pathways, specifying the interaction type (mediation), temporal framing (life-course accumulation), and evidentiary limits. Provide a pathway description using arrows and explain why adjusting for mediators changes interpretation.” | **Socioeconomic Status and Type 2 Diabetes Risk**  The relationship between socioeconomic status (SES) and type 2 diabetes (T2D) operates primarily through **mediation**, where SES influences diabetes risk indirectly by shaping exposure to various risk factors throughout life.  **Primary Mediating Pathways**  **SES → Mediators → T2D Risk**  The core pathways include:  **1. Dietary Quality Pathway** Lower SES → Limited food access/affordability → Higher processed food consumption, lower fruit/vegetable intake → Increased adiposity, insulin resistance → T2D  **2. Physical Activity Pathway** Lower SES → Unsafe neighborhoods, limited recreation facilities, sedentary occupations → Reduced physical activity → Obesity, metabolic dysfunction → T2D  **3. Healthcare Access Pathway** Lower SES → Limited insurance, fewer preventive visits → Delayed prediabetes detection, inadequate management → Progression to T2D  **4. Psychosocial Stress Pathway** Lower SES → Chronic financial strain, job insecurity, discrimination → Elevated cortisol, inflammatory responses, health-damaging coping behaviors → Metabolic dysregulation → T2D  **5. Environmental Exposure Pathway** Lower SES → Residence in disadvantaged areas → Air pollution, endocrine disruptors, limited green space → Systemic inflammation, metabolic disruption → T2D  **Temporal Framing: Life-Course Accumulation**  The SES-diabetes relationship follows a **cumulative risk model** across the life course:  **Early life:** Childhood SES affects birth weight, childhood obesity, dietary patterns established in critical developmental periods  **Adolescence/Young adulthood:** Educational attainment (influenced by childhood SES) shapes future occupational opportunities and health literacy  **Adulthood:** Occupational SES determines income, work conditions, and stress exposure over decades  **Cumulative effect:** Each life stage contributes additional risk, with disadvantage at multiple timepoints producing compounding effects. A person experiencing low SES across their entire life course faces substantially higher risk than someone with mixed or improving SES trajectory.  **The Adjustment Problem: Why Controlling for Mediators Changes Interpretation**  When you statistically adjust for mediators, you fundamentally alter what the SES coefficient represents:  **Unadjusted model:** SES → T2D (total effect = -0.45, hypothetically) This captures the *entire* effect of SES on diabetes through all pathways.  **Adjusted model:** SES → T2D | controlling for diet, activity, BMI, stress (direct effect = -0.12) This captures only effects through pathways *not measured* by your mediators.  **The interpretation shift:**  The unadjusted effect answers: "How much does SES affect diabetes risk overall?"  The adjusted effect answers: "How much does SES affect diabetes risk through pathways *other than* the mediators we controlled for?"  **Why this matters for causal understanding:**  If diet, physical activity, and obesity are *on the causal pathway* from SES to diabetes (which they are), then controlling for them removes much of the mechanism through which SES operates. The adjusted estimate tells you almost nothing about the true impact of improving someone's SES, because improving SES *would* change their diet, activity, and weight.  **Example:** Imagine the adjusted SES effect becomes non-significant after controlling for BMI. This doesn't mean "SES doesn't matter." It means "SES operates largely through body weight." For intervention purposes, you still need to address SES because that's what determines BMI in the first place.  **Evidentiary Limits**  **Residual confounding:** Even sophisticated studies cannot fully capture all confounders (genetics, unmeasured early-life factors, personality traits affecting both SES attainment and health behaviors).  **Measurement imprecision:** SES is typically measured via education, income, or occupation at one timepoint, missing life-course complexity and wealth, debt, or subjective social status.  **Mediator measurement:** Dietary quality, stress, and environmental exposures are difficult to measure comprehensively, meaning "adjusted" models still contain unmeasured mediation.  **Causal ordering uncertainty:** Some relationships may be bidirectional (e.g., poor health can limit educational/occupational achievement, creating reverse causation).  **Effect heterogeneity:** The strength and relative importance of different pathways varies by geography, race/ethnicity, gender, and age, limiting generalizability of any single study.  **Intervention evidence gap:** Most evidence is observational. Randomized trials of income supplementation or housing mobility provide stronger causal evidence but are rare and often short-term, missing long-term cumulative effects.  The SES-diabetes relationship is robust and well-documented, but the precise quantitative contribution of each pathway and the best intervention targets remain areas of ongoing research.  [Claude is AI and can make mistakes.  Please double-check responses.](https://support.anthropic.com/en/articles/8525154-claude-is-providing-incorrect-or-misleading-responses-what-s-going-on) |
| Scenario 3 (Lay) Fruit consumption and type 2 diabetes *Effect modification* | A. Baseline additive | “What fruit is safe to eat if you have type 2 diabetes?” | Many fruits are safe and healthy to eat with type 2 diabetes! The key is choosing fruits wisely and being mindful of portions. Here's what you should know:  **Generally good choices:**   - Berries (strawberries, blueberries, raspberries, blackberries) - lower in sugar and high in fiber - Cherries - have a lower glycemic index - Apples and pears - especially with the skin on for extra fiber - Citrus fruits (oranges, grapefruit) - good fiber content - Stone fruits (peaches, plums, apricots) - Kiwi   **Important principles:**   - **Portion control matters** - even healthy fruits contain carbohydrates that affect blood sugar. A typical serving is about 15g of carbs (roughly one small piece of fruit or 1/2 cup of berries) - **Fiber is your friend** - fruits with more fiber cause slower blood sugar rises - **Whole fruit over juice** - whole fruits have fiber that slows sugar absorption, while juice can spike blood sugar quickly - **Pair with protein or fat** - eating fruit with nuts, cheese, or yogurt can help moderate blood sugar response - **Timing can matter** - some people do better eating fruit with meals rather than alone as a snack   **Watch portions with:**   - Tropical fruits like pineapple, mango, and papaya (higher sugar content) - Dried fruits (very concentrated sugars) - Bananas and grapes (higher carb content per serving)   These aren't forbidden, just need smaller portions and careful monitoring.  The best approach is to test your blood sugar before and after eating different fruits to see how your body specifically responds, since everyone's different. Have you been monitoring how different foods affect your levels? |
| B. Optimised additive | “What fruit is safe to eat if you have type 2 diabetes? Explain your answer clearly and briefly indicate the kinds of reliable evidence typically used to support such advice (e.g. dietary guidelines, systematic reviews, or large observational studies).” | Most fruits are safe to eat with type 2 diabetes when consumed in appropriate portions. Here are good options:  **Lower glycemic impact fruits:**   - Berries (strawberries, blueberries, raspberries, blackberries) - Cherries - Apples and pears - Citrus fruits (oranges, grapefruit) - Peaches and plums - Kiwi   **Key principles:**   - Focus on whole fruits rather than juices (fiber slows sugar absorption) - Pay attention to portion sizes (typically 1/2 to 1 cup or one small piece) - Pair fruit with protein or healthy fats to minimize blood sugar spikes - Spread fruit intake throughout the day rather than eating large amounts at once   **What makes fruit safe:** Whole fruits contain fiber, which slows digestion and prevents rapid blood sugar spikes. They also provide essential vitamins, minerals, and antioxidants. The concern isn't the fruit itself but rather the quantity and form (whole vs. juice).  **Evidence base:** This advice comes from:   - **Clinical practice guidelines** from organizations like the American Diabetes Association - **Systematic reviews and meta-analyses** examining fruit consumption and glycemic control - **Large prospective cohort studies** showing associations between whole fruit intake and diabetes outcomes - **Glycemic index/glycemic load research** measuring how different fruits affect blood sugar   The general consensus is that whole fruits are part of a healthy diabetes diet, though individual responses can vary, so monitoring your own blood sugar response is valuable. |
| C. Interaction-aware inquiry | “What fruit is safe to eat if you have type 2 diabetes? Explain how the answer depends on different conditions, specifying key modifying factors (e.g. portion size, type of fruit, meal context, medication use), the interaction type (effects differ by condition), and short-term versus longer-term effects. Provide 3–5 ‘it depends’ statements and common oversimplifications to avoid.” | **Fruit and Type 2 Diabetes: A Nuanced Answer**  Most fruits can be safely eaten with type 2 diabetes, but the key word is "safely" varies dramatically based on context. Here's how different conditions modify the answer:  **Key "It Depends" Statements**  **1. It depends on portion size and glycemic load** A small apple (15g carbs) affects blood sugar very differently than eating three bananas (75g+ carbs). The fiber, water content, and total carbohydrate load matter more than simply whether a fruit is "allowed." A half-cup of berries has minimal impact, while a large smoothie with multiple fruits can spike glucose significantly.  **2. It depends on what else you eat with the fruit** Eating an orange alone on an empty stomach will raise blood sugar faster and higher than eating the same orange with almonds, cheese, or as part of a balanced meal. Protein, fat, and fiber slow carbohydrate absorption. This is why fruit as dessert after a meal often causes less of a spike than fruit as a standalone snack.  **3. It depends on your current glucose control and medication** Someone with well-controlled diabetes (HbA1c around 6%) metabolizes fruit differently than someone with poorly controlled diabetes (HbA1c over 8%). Additionally, if you take insulin or sulfonylureas, the timing of fruit intake relative to medication becomes critical for avoiding hypoglycemia. Those on metformin alone have more flexibility.  **4. It depends on the form and processing of the fruit** Whole strawberries affect blood sugar differently than strawberry juice (no fiber, concentrated sugars), dried strawberries (concentrated without water), or strawberries blended in a smoothie (disrupted fiber structure). The physical form changes digestion speed and glucose response, even with identical fruit types.  **5. It depends on individual metabolic response and activity level** Some people's glucose spikes significantly with grapes but handles apples well; others show the opposite pattern. Physical activity also matters—fruit eaten before or after exercise is metabolized differently than fruit eaten during sedentary periods, as muscles absorb glucose without requiring as much insulin.  **Common Oversimplifications to Avoid**   - **"Avoid all sweet fruits"** – Sweetness doesn't perfectly correlate with glycemic impact. Cherries taste sweet but have a moderate glycemic index, while watermelon tastes less sweet but can spike glucose faster due to lower fiber. - **"Fruit is just sugar"** – Unlike candy, whole fruit contains fiber, water, vitamins, antioxidants, and phytonutrients that benefit overall health and slow glucose absorption. The package matters. - **"All berries are safe, all tropical fruits are dangerous"** – While berries generally have less impact, portions still matter, and some tropical fruits like papaya can fit well in appropriate amounts. - **"Fresh is always better than frozen"** – Frozen whole fruit (without added sugar) is nutritionally equivalent and can be equally appropriate for diabetes management. - **"You need to eliminate fruit entirely"** – Most diabetes guidelines recommend 2-3 servings of fruit daily as part of carbohydrate budgets. Complete elimination isn't necessary and may reduce beneficial nutrient intake.   **Short-term vs. Longer-term Effects**  **Short-term (minutes to hours):** The immediate concern is blood glucose spikes. High-glycemic fruits in large portions can raise blood sugar within 15-30 minutes, peaking around 1-2 hours. This matters for preventing hyperglycemia symptoms and reducing glucose variability.  **Longer-term (weeks to years):** Regular fruit consumption is associated with *reduced* type 2 diabetes risk and better cardiovascular outcomes in research studies. The fiber, antioxidants, and anti-inflammatory compounds provide protective effects that outweigh concerns about natural sugars when fruit is consumed appropriately. Chronic avoidance of all fruit may increase cardiovascular disease risk, which is already elevated in diabetes.  The practical answer: Work with your healthcare team to test your individual responses (using a glucose meter), aim for whole fruits in reasonable portions (typically ½ to 1 cup), pair with protein or healthy fats, and prioritize lower-glycemic options like berries, cherries, apples, and pears while being more cautious with larger portions of higher-glycemic fruits like pineapple, watermelon, or dried fruits. |
| Scenario 4 (Lay) Diabetes medication and weight gain in type 2 diabetes *Mediation* | A. Baseline additive | “Why do some type 2 diabetes medicines cause weight gain?” | Several type 2 diabetes medications cause weight gain through different mechanisms:  **Insulin** is the most common culprit. When you take insulin, it helps glucose enter cells for energy or storage. This means less glucose is lost through urine (which happened when blood sugar was high), and your body becomes more efficient at storing energy as fat. Insulin also can increase appetite in some people.  **Sulfonylureas** (like glipizide or glyburide) stimulate your pancreas to release more insulin. This leads to weight gain through the same mechanism as taking insulin directly - more glucose gets stored rather than eliminated, and you may experience more low blood sugar episodes that trigger hunger.  **Thiazolidinediones** (like pioglitazone) improve insulin sensitivity but also cause fluid retention and encourage fat storage, particularly subcutaneous fat. They can cause several pounds of weight gain, some from actual fat and some from fluid.  The weight gain happens because these medications are doing their job - getting glucose out of your bloodstream and into cells. Before treatment, you may have been losing calories through glucose in your urine. Once that's corrected, those calories stay in your body.  This is why many doctors now prefer medications like metformin, GLP-1 agonists (like semaglutide), or SGLT2 inhibitors when possible - these either don't cause weight gain or actually promote weight loss. The choice depends on your individual situation, but if weight gain is a concern for you, it's definitely worth discussing alternatives with your doctor. |
| B. Optimised additive | “Why do some type 2 diabetes medicines cause weight gain? Explain the main mechanisms involved and briefly indicate the kinds of reliable evidence typically used to support such explanations (e.g. clinical guidelines, systematic reviews, or large observational studies).” | Several type 2 diabetes medications cause weight gain through distinct physiological mechanisms:  **Insulin** promotes weight gain primarily by reducing glucosuria (loss of glucose and calories in urine) and by acting as an anabolic hormone that promotes fat storage and inhibits fat breakdown. When glucose control improves, patients retain calories they were previously losing through urination. Insulin also increases appetite in some individuals and can cause hypoglycemia, leading to compensatory eating.  **Sulfonylureas** (like glipizide, glyburide) stimulate the pancreas to release more insulin regardless of glucose levels. This creates hyperinsulinemia, which drives the same fat-storage mechanisms as exogenous insulin. The increased insulin secretion promotes lipogenesis and reduces lipolysis, while the risk of hypoglycemia can trigger defensive eating patterns.  **Thiazolidinediones** (like pioglitazone) activate PPAR-gamma receptors, which increases insulin sensitivity but also promotes adipocyte differentiation and fat storage, particularly subcutaneous fat. They cause fluid retention through increased sodium reabsorption in the kidneys, contributing to weight gain. Interestingly, while they increase fat mass, they may improve metabolic parameters by redistributing fat from visceral to subcutaneous depots.  **Evidence base:** These mechanisms are supported by multiple lines of evidence. Large randomized controlled trials like UKPDS (United Kingdom Prospective Diabetes Study) and ADOPT documented weight changes across medication classes. Systematic reviews and meta-analyses consistently quantify the magnitude of weight gain (typically 2-5 kg for insulin and sulfonylureas, 2-3 kg for TZDs). Clinical practice guidelines from organizations like the American Diabetes Association and European Association for the Study of Diabetes incorporate this evidence when making treatment recommendations, particularly for overweight patients where weight-neutral or weight-loss medications may be preferred. |
| C. Interaction-aware inquiry | “Why do some type 2 diabetes medicines cause weight gain? Explain this relationship by explicitly describing mediating processes, specifying the interaction type (mediation) and temporal pattern (early vs longer-term effects). Provide a step-by-step pathway explanation and explain common oversimplifications to avoid.” | **Why Type 2 Diabetes Medicines Cause Weight Gain**  The relationship between certain diabetes medications and weight gain involves **multiple mediating biological processes** that unfold over different timeframes. Let me walk you through the actual mechanisms rather than the oversimplified explanations you often hear.  **The Step-by-Step Pathway**  **1. Initial Drug Action (Hours to Days)**  When medications like sulfonylureas or insulin are introduced, they don't directly "cause" weight gain. Instead, they trigger a cascade:   - The drug binds to receptors (sulfonylureas on pancreatic beta cells, or insulin to insulin receptors) - This stimulates insulin secretion or provides exogenous insulin - Insulin levels in the bloodstream rise   **2. First Mediating Process: Metabolic Shift (Days to Weeks)**  Higher insulin levels mediate weight gain through several simultaneous pathways:   - **Anabolic signaling**: Insulin activates cellular pathways (PI3K/Akt) that promote glucose and amino acid uptake into cells - **Lipogenesis activation**: Insulin stimulates the enzyme acetyl-CoA carboxylase, converting excess glucose to fatty acids in the liver and adipose tissue - **Lipolysis suppression**: Insulin inhibits hormone-sensitive lipase, preventing the breakdown of stored fat - **Glycogen storage**: Glucose gets stored as glycogen in liver and muscle   This metabolic shift means the body moves from a catabolic state (where it was burning fat due to poor glucose control) to an anabolic state.  **3. Second Mediating Process: Energy Recovery (Weeks)**  Before treatment, patients were losing glucose (and thus calories) through urine due to hyperglycemia:   - A poorly controlled diabetic might lose 200-400+ calories daily in urinary glucose - Once blood sugar normalizes with medication, this caloric loss stops - This represents "recaptured" energy that now gets stored - If caloric intake remains constant, this creates a positive energy balance   **4. Third Mediating Process: Appetite Regulation (Weeks to Months)**  Insulin interacts with central appetite regulation:   - Some medications (especially sulfonylureas) can cause episodic hypoglycemia - Hypoglycemic episodes trigger counter-regulatory responses and hunger - Patients eat to correct or prevent low blood sugar - This creates a behavioral loop: medication → low blood sugar → increased food intake → weight gain   **5. Longer-Term Effects (Months)**  The cumulative effect involves:   - Expanded adipose tissue mass from sustained lipogenesis - Potential changes in basal metabolic rate - Behavioral adaptations (eating preemptively to avoid hypoglycemia)   **Temporal Patterns: Early vs Long-Term**  **Early effects (first 3-6 months):**   - Most rapid weight gain occurs here - Primarily driven by metabolic shift and caloric recapture - Can see 2-5 kg gain with insulin or sulfonylureas   **Long-term effects (beyond 6 months):**   - Weight gain typically plateaus as a new equilibrium is reached - Continued gain suggests ongoing positive energy balance - Behavioral factors become more prominent   **Common Oversimplifications to Avoid**  **Oversimplification #1: "Insulin makes you fat"**  **Reality:** Insulin doesn't directly create fat from nothing. It mediates nutrient partitioning—directing where consumed calories go. The weight gain reflects:   - Recovery from a disease state where calories were being wasted - A shift in how the body handles energy, not creation of energy   **Oversimplification #2: "It's just water weight"**  **Reality:** While some initial weight gain involves glycogen storage (which binds water at ~3-4g water per gram of glycogen), sustained weight gain represents actual adipose tissue accumulation through the lipogenesis pathway.  **Oversimplification #3: "All diabetes medications cause weight gain"**  **Reality:** The mechanism matters. Medications work through different pathways:   - **Weight-gaining**: Insulin, sulfonylureas, thiazolidinediones (each through distinct mechanisms) - **Weight-neutral**: DPP-4 inhibitors - **Weight-reducing**: Metformin, GLP-1 agonists, SGLT2 inhibitors   This isn't a property of "treating diabetes" but of specific drug mechanisms.  **Oversimplification #4: "The weight gain is inevitable"**  **Reality:** While the metabolic mediators are biochemical, the outcome depends on the interaction between:   - Drug-induced metabolic changes (mediator) - Dietary intake (modifiable factor) - Physical activity (modifiable factor)   Weight gain can be mitigated by adjusting caloric intake downward to account for the recaptured glucose calories and improved metabolic efficiency.  **Oversimplification #5: "Weight gain means the medication isn't working"**  **Reality:** Weight gain often indicates the medication *is* working—glucose is being retained and utilized rather than lost in urine. The challenge is that glycemic control and weight management sometimes require different therapeutic strategies.  **The Mediation Model**  To be explicit about the interaction type:  Drug → ↑Insulin → Multiple Mediators → Weight Gain  ├─ Lipogenesis  ├─ Lipolysis suppression  ├─ Caloric recapture  └─ Appetite effects  This is **full mediation** for drugs like sulfonylureas—they cause weight gain *through* insulin. For exogenous insulin, it's more direct but still mediated by the same downstream pathways. Understanding these mediating processes helps explain why interventions targeting different points in the pathway (like switching to weight-neutral medications or dietary adjustments) can modify outcomes. |
