# Supplementary material
Source: Research Square preprint supplement (doi:10.21203/rs.3.rs-8707900/v1)
Supplement: Supplementary file 6 [file b906901f1bab1fb1bbc23e6a.docx]

Table 4. Demonstrator scenarios and inquiry conditions

Date of data collection: 6.01.2026

Platform: Grok

| Scenario (user type & interaction motif) | Condition | Prompt | Results |
| --- | --- | --- | --- |
| Scenario 1 (Expert) Physical activity and type 2 diabetes risk across socioeconomic contexts *Effect modification* | A. Baseline additive | “How much does physical activity reduce the risk of type 2 diabetes?” | Regular **physical activity** significantly reduces the risk of developing **type 2 diabetes**, with evidence from large cohort studies, meta-analyses, and intervention trials showing consistent benefits.  **Risk Reduction from Observational Studies**  Epidemiological data indicate that physically active individuals have a **30–50% lower risk** of type 2 diabetes compared to sedentary people. This range appears across multiple reviews of prospective cohort studies.  A systematic review of 20 cohort studies found an average **42% risk reduction** when comparing the most active to the least active participants, with a dose-response effect where even small increases in activity lower risk.  Another meta-analysis reported around **35% lower risk** for active individuals.  Moderate activities like brisk walking provide substantial protection: for example, walking at a normal pace reduces risk by **20–30%**, while higher volumes or faster paces yield greater benefits.  **Evidence from Intervention Trials**  Structured lifestyle programs combining physical activity (often ≥150 minutes/week of moderate-intensity exercise) with modest weight loss achieve even higher reductions.  Major trials like the Diabetes Prevention Program show **40–70% lower incidence** of type 2 diabetes in high-risk individuals (e.g., those with prediabetes), with the iconic U.S. DPP reporting **58% reduction** overall.  Even without full weight loss goals, meeting physical activity targets alone reduces risk by about **44%**.  **Dose-Response and Recommendations**  The relationship is dose-dependent: steeper risk reductions occur at lower activity levels, with benefits plateauing at higher volumes (e.g., 5–7 hours/week of moderate activity).  Guidelines from organizations like the **CDC**, **WHO**, and **American Diabetes Association** recommend at least **150 minutes/week** of moderate-intensity aerobic activity (plus strength training 2+ days/week) for prevention and management, as this level substantially lowers risk.  All types of activity—aerobic, resistance, and even daily walking—contribute, partly by improving insulin sensitivity, reducing adiposity, and enhancing cardiometabolic health.  These findings are supported by high-quality evidence, including systematic reviews and randomized trials, confirming physical activity as a key modifiable factor for type 2 diabetes prevention. |
| B. Optimised additive | “How much does physical activity reduce the risk of type 2 diabetes? Explain your reasoning step by step and briefly indicate the kinds of reliable evidence typically used to support such explanations (e.g. clinical guidelines, systematic reviews, or large observational studies).” | According to a systematic review and meta-analysis of epidemiological studies, increasing physical activity from inactive levels to the recommended guideline amount (150 minutes per week of moderate-intensity aerobic activity, equivalent to about 11.25 MET-hours per week) is associated with a 26% lower risk of developing type 2 diabetes (relative risk 0.74). Higher levels of activity show even greater reductions in a dose-response manner, with the most substantial benefits occurring when moving from sedentary to low-to-moderate activity, though returns diminish at very high volumes. For example, in people with prediabetes, moderate physical activity (compared to low levels) has been linked to a 43% risk reduction, while brisk walking (over 6.4 km/hour) is associated with a 39% lower risk compared to casual walking. These estimates can vary based on factors like baseline risk (e.g., higher in those with prediabetes), activity type (e.g., aerobic vs. resistance), duration, and intensity, but overall, regular physical activity consistently lowers incidence by 20-40% or more in a graded fashion.  Step-by-step reasoning:   1. The question seeks a quantitative estimate of risk reduction, so I focused on synthesizing data from high-quality sources rather than anecdotal or single-study claims. 2. Physical activity improves insulin sensitivity, aids weight management, reduces inflammation, and enhances glucose uptake in muscles, which biologically explains its preventive role against type 2 diabetes. 3. Risk reductions are relative (comparing active vs. inactive groups) and derived from large-scale data, but absolute reductions depend on individual factors like age, BMI, and genetics. 4. Guidelines emphasize at least 150 minutes weekly of moderate activity (e.g., brisk walking) for prevention, with additional benefits from strength training or higher volumes. 5. Combined lifestyle changes (activity plus diet) can yield higher reductions (up to 58% in high-risk groups), but the query isolates physical activity.   Reliable evidence includes systematic reviews and meta-analyses of prospective cohort studies (e.g., summarizing millions of participants over decades), randomized controlled trials (e.g., Diabetes Prevention Program), and clinical guidelines from organizations like the ADA, CDC, and WHO. |
| C. Interaction-aware inquiry | “How much does physical activity reduce the risk of type 2 diabetes? Explain how this relationship differs across socioeconomic and healthcare-access contexts. Specify relevant determinant domains, the interaction type (effect modification), the time horizon (short-term vs long-term effects), and evidentiary limits. Provide 3–5 conditional ‘if–then’ statements and key uncertainties.” | Regular physical activity is associated with a 30-50% reduction in the risk of developing type 2 diabetes compared to sedentary lifestyles, based on epidemiological evidence from prospective studies and meta-analyses. More specifically, high levels of total physical activity (versus low) show a relative risk (RR) of 0.65 (95% CI 0.59-0.71), indicating about a 35% risk reduction, while leisure-time activity yields an RR of 0.74 (95% CI 0.70-0.79) or roughly 26% reduction. Dose-response analyses suggest nonlinear benefits, with steeper reductions at lower activity levels (e.g., up to 5-7 hours per week of moderate or vigorous activity), and even modest amounts like 150 minutes per week of moderate-intensity activity can lower risk by 20-30%. Faster-paced activities, such as brisk walking (>6.4 km/hour), may reduce risk by up to 39% compared to casual walking.  The relationship between physical activity and type 2 diabetes risk varies by socioeconomic status (SES) and healthcare access, with lower SES and limited healthcare often attenuating the protective effects of physical activity due to barriers like unsafe environments, time constraints, or lack of resources for sustained engagement. In lower-SES groups, diabetes risk is higher overall, and physical activity's benefits are mediated by factors such as reduced adherence or compounding risks like poor diet and stress; health behaviors including physical activity explain 33-45% of the SES-diabetes association. Better healthcare access enhances the impact by providing tailored guidance, monitoring, and integration with prevention programs, potentially amplifying risk reductions by 10-20% through improved compliance and early intervention. In contrast, limited access in underserved areas exacerbates disparities, as individuals may lack support for initiating or maintaining activity regimens.  Relevant determinant domains include socioeconomic status (encompassing education, income, and occupation), neighborhood and physical environment (e.g., access to safe spaces for exercise), health care (e.g., availability of preventive services and diabetes education), and social context (e.g., social cohesion and community support for active lifestyles). The interaction type is effect modification, where SES and healthcare access alter the magnitude of physical activity's protective effect on diabetes risk; for instance, high SES may strengthen the association by enabling consistent activity, while low SES or poor access weakens it through barriers like environmental hazards or inadequate medical follow-up. Regarding time horizon, short-term effects involve immediate improvements in insulin sensitivity and glycemic control (e.g., within days to weeks of starting activity), while long-term effects accumulate over months to years, leading to sustained risk reduction (e.g., 30-50% lower incidence) and prevention of complications like cardiovascular disease. Evidentiary limits include reliance on observational data prone to residual confounding (e.g., unmeasured lifestyle factors), misclassification of self-reported activity levels, high risk of bias in some studies, and low to moderate certainty due to heterogeneity in populations and interventions.  Here are 4 conditional 'if-then' statements summarizing key relationships:   - If an individual has low SES, then the risk reduction from physical activity may be diminished due to barriers like limited safe exercise spaces, resulting in only 10-20% lower diabetes risk compared to 30-50% in high-SES groups. - If healthcare access is adequate, then physical activity's protective effect is enhanced through professional guidance and monitoring, potentially increasing risk reduction by an additional 15-25%. - If physical activity is initiated early in prediabetes (short-term horizon), then immediate glycemic improvements occur, preventing progression to diabetes in up to 20-30% of cases over the following years. - If SES is high and combined with good healthcare access, then long-term adherence to physical activity is more likely, yielding compounded risk reductions of 40-60% over a decade.   Key uncertainties involve the precise dose-response curve in diverse SES contexts (e.g., whether minimal activity suffices in low-access settings), the role of unmeasured interactions with diet or genetics, long-term adherence rates across populations, and the generalizability of findings from high-income countries to global settings with varying healthcare systems. |
| Scenario 2 (Expert) Socioeconomic disadvantage and type 2 diabetes risk *Mediation* | A. Baseline additive | “Why does socioeconomic status affect the risk of type 2 diabetes?” | Socioeconomic status (SES), which encompasses factors like income, education, and occupation, has a well-established inverse relationship with the risk of developing type 2 diabetes (T2D), meaning lower SES is linked to higher risk. This association persists across populations and is influenced by a combination of behavioral, environmental, and systemic factors that disproportionately affect those in lower SES groups.  One primary mechanism is limited access to healthcare and preventive services. Individuals with lower SES often face barriers such as lack of health insurance, fewer opportunities for regular screenings, and delayed treatment, which can lead to poorer management of prediabetes or early T2D. For instance, those in poverty-level income brackets have been shown to have up to twice the diabetes-related mortality risk compared to higher-income groups, partly due to inadequate healthcare utilization.  Lifestyle and behavioral differences also play a significant role. Lower SES is associated with higher rates of unhealthy behaviors, including poor diet (e.g., limited access to fresh fruits and vegetables), reduced physical activity, higher alcohol consumption, and smoking, all of which elevate T2D risk. These patterns stem from economic constraints that make healthier options less affordable or accessible, as well as lower education levels that may reduce awareness of diabetes prevention strategies.  Environmental and neighborhood factors further exacerbate the disparity. People in lower-SES areas often live in "food deserts" with limited healthy food options, fewer safe spaces for exercise, and higher exposure to stress from economic instability or unsafe conditions, which can contribute to obesity and insulin resistance—key precursors to T2D. Studies indicate that residing in socioeconomically deprived neighborhoods can increase T2D risk by 1.5 to 2 times, even after adjusting for individual factors.  Additionally, sustained low SES over time amplifies these effects. Research shows that individuals with persistently low income (e.g., over five years) face up to a 57% higher T2D risk compared to those with stable higher incomes, while income decreases are linked to elevated risk regardless of starting point. Lifecourse exposure to low SES, from childhood onward, compounds this through cumulative disadvantages in health behaviors and resources.  These disparities are often intertwined with racial and ethnic inequalities, where minority groups in lower-SES strata experience even higher T2D rates due to overlapping social determinants. Overall, addressing SES-related T2D risk requires interventions targeting equitable access to education, healthy environments, and healthcare to mitigate these modifiable pathways. |
| B. Optimised additive | “Why does socioeconomic status affect the risk of type 2 diabetes? Explain your reasoning step by step and briefly indicate the kinds of reliable evidence typically used to support such explanations (e.g. clinical guidelines, systematic reviews, or large observational studies).” | **Step-by-Step Reasoning on Why Socioeconomic Status Affects the Risk of Type 2 Diabetes**   1. **Understanding Socioeconomic Status (SES) and Type 2 Diabetes**: SES is a multifaceted measure encompassing income, education level, occupation, and access to resources. Type 2 diabetes (T2D) is a chronic condition characterized by insulin resistance and high blood sugar, often influenced by modifiable risk factors like obesity, poor diet, physical inactivity, and genetic predisposition. Lower SES groups tend to face structural barriers that amplify these risk factors, leading to a higher incidence of T2D compared to higher SES groups. 2. **Access to Healthy Lifestyle Resources**: Individuals with lower SES often live in environments with limited access to affordable nutritious foods (e.g., "food deserts") and safe spaces for physical activity, such as parks or gyms. This promotes diets high in processed, calorie-dense foods and sedentary behaviors, increasing obesity rates—a key driver of T2D. For instance, studies show that lower income correlates with higher body mass index (BMI) and reduced physical activity, mediating the SES-T2D link. 3. **Healthcare Access and Preventive Care**: Lower SES is associated with inadequate health insurance, fewer medical check-ups, and delayed diagnosis or management of prediabetes. This results in poorer control of blood sugar levels and higher progression to T2D. Research indicates that factors like lack of health insurance and limited healthcare utilization explain part of the elevated risk in disadvantaged groups. 4. **Behavioral and Psychosocial Factors**: Lower SES often involves higher exposure to stress from financial instability, job insecurity, or discrimination, which can elevate cortisol levels and contribute to insulin resistance. Additionally, behaviors like higher tobacco use or irregular alcohol consumption are more prevalent in low-SES populations and further heighten T2D risk. These lifestyle elements, combined with lower health literacy due to limited education, create a cumulative disadvantage over the life course. 5. **Cumulative and Lifelong Effects**: SES impacts T2D risk across the lifespan; early-life disadvantages (e.g., low parental SES) can lead to persistent health inequities. Sustained low income or downward income mobility exacerbates this, with studies showing a graded increase in risk as SES decreases, independent of other factors like age or race. 6. **Disparities in Vulnerable Populations**: The effect is amplified in racial/ethnic minorities and urban deprived areas, where SES intersects with systemic inequities, leading to even higher T2D prevalence and complications.   **Types of Reliable Evidence**  Explanations like this are typically supported by large observational studies (e.g., cross-sectional analyses from national surveys like NHANES), prospective cohort studies tracking populations over years, systematic reviews synthesizing multiple studies, and meta-analyses quantifying risks across diverse groups. |
| C. Interaction-aware inquiry | “Why does socioeconomic status affect the risk of type 2 diabetes? Explain this relationship by explicitly describing mediating pathways, specifying the interaction type (mediation), temporal framing (life-course accumulation), and evidentiary limits. Provide a pathway description using arrows and explain why adjusting for mediators changes interpretation.” | Lower socioeconomic status (SES)—typically measured by factors like income, education, occupation, or neighborhood disadvantage—is consistently associated with a higher risk of developing type 2 diabetes (T2D) across diverse populations. This relationship operates through mediation, where intermediate factors (mediators) explain how SES influences T2D risk, rather than direct causation or moderation (where SES would alter the effect of another variable on T2D). The temporal framing is one of life-course accumulation, meaning that disadvantages in SES begin early (e.g., in childhood) and compound over time through repeated exposures, shaping health behaviors, physiological responses, and access to resources in adulthood, ultimately elevating cumulative T2D risk.  **Mediating Pathways**  Mediation occurs when SES affects T2D indirectly via behavioral, metabolic, psychosocial, and environmental pathways. These mediators are modifiable factors that transmit the effect of SES on T2D. For instance:   - **Behavioral and metabolic pathways**: Lower SES often leads to limited access to healthy foods, safe spaces for exercise, and health education, resulting in poorer lifestyle choices that promote obesity and insulin resistance. A common pathway can be described as: Low SES → Reduced physical activity and poor diet → Increased adiposity (e.g., higher BMI) → Insulin resistance and impaired glucose metabolism → T2D. - **Psychosocial pathways**: Chronic stress from financial instability or demanding work environments in lower-SES groups can elevate cortisol levels, contributing to metabolic dysregulation. An example pathway: Low SES → High job demands and low job control → Elevated stress and depressive symptoms → Disrupted endocrine function (e.g., higher cortisol) → T2D. - **Access-related pathways**: Lower SES restricts healthcare utilization and preventive services, allowing prediabetic conditions to progress unchecked. Pathway: Low SES → Limited health insurance and healthcare access → Delayed screening and management → Progression from prediabetes → T2D. - **Environmental pathways**: Neighborhood disadvantage in lower-SES areas may include fewer recreational resources or more fast-food outlets, though evidence for food environment as a strong mediator is mixed and often weak. Pathway: Low neighborhood SES → Fewer leisure-time physical activity resources (e.g., parks) → Sedentary behavior → Metabolic changes → T2D.   These pathways are not mutually exclusive and often intersect; for example, psychosocial stress might exacerbate poor diet, amplifying metabolic effects over the life course.  **Why Adjusting for Mediators Changes Interpretation**  In statistical models like regression or mediation analysis, the unadjusted association between SES and T2D represents the *total effect*—the overall impact, including both direct and indirect (mediated) pathways. Adjusting for mediators (e.g., adding BMI or physical activity as covariates) isolates the *direct effect* of SES on T2D, which is the portion not explained by those mediators. This adjustment typically reduces or eliminates the apparent association between SES and T2D if the mediators fully account for the pathway, shifting interpretation from "SES broadly increases T2D risk" to "SES increases T2D risk primarily through [specific mediator], with little residual direct effect." However, this can lead to overadjustment bias if the goal is to understand the full causal impact of SES, as it masks the true pathways and underestimates SES's role. Conversely, it helps identify intervention targets (e.g., improving access to physical activity) by quantifying how much of the effect flows through each mediator.  **Evidentiary Limits**  Evidence primarily stems from observational cohort and cross-sectional studies, which establish associations but cannot fully prove causality due to potential confounding (e.g., genetic factors or unmeasured variables like family history) and reverse causation (e.g., T2D leading to reduced income). Mediation analyses rely on assumptions like no unmeasured confounding between mediator and outcome, which are often violated. Findings vary by population (e.g., stronger in women or certain ethnic groups), geography (urban vs. rural), and SES measures, limiting generalizability. Few randomized trials exist to test interventions, and some mediators (e.g., food environment) show inconsistent effects across studies. |
| Scenario 3 (Lay) Fruit consumption and type 2 diabetes *Effect modification* | A. Baseline additive | “What fruit is safe to eat if you have type 2 diabetes?” | People with **type 2 diabetes** can safely enjoy fruit as part of a balanced diet. Fruit provides essential vitamins, minerals, fiber, and antioxidants that support overall health and may even help manage blood sugar when chosen wisely.  The key is focusing on **whole fruits** with a **low glycemic index (GI)**—typically under 55—which cause slower rises in blood sugar due to their fiber content. The American Diabetes Association (ADA) emphasizes fresh, frozen, or canned fruits without added sugars, and recommends including fruit daily while monitoring portions (e.g., about 1/2 cup or one small piece per serving, aiming for 2-3 servings spread throughout the day).  **Safe and Recommended Fruits**  These low-GI options are frequently highlighted by experts like the ADA, Cleveland Clinic, and Harvard Health as excellent choices:   - **Berries** (strawberries, blueberries, raspberries, blackberries): Very low GI, high in fiber and antioxidants.   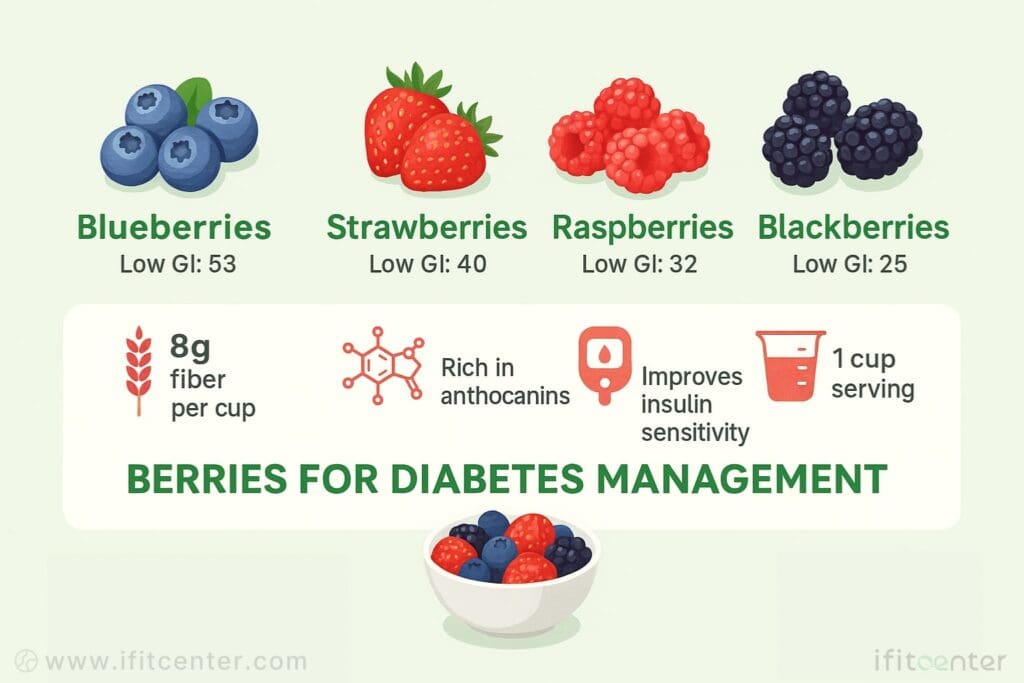  [drbabak.org](https://drbabak.org/best-fruits-for-diabetic-patients/)  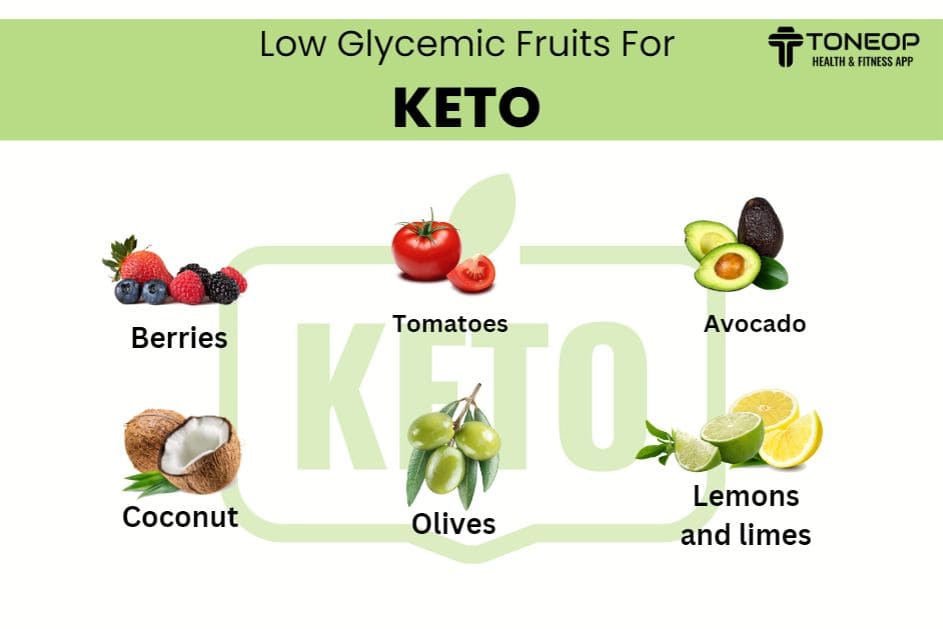  [toneop.com](https://toneop.com/blog/11-Low-Glycemic-Fruits-For-A-Healthy-Lifestyle)  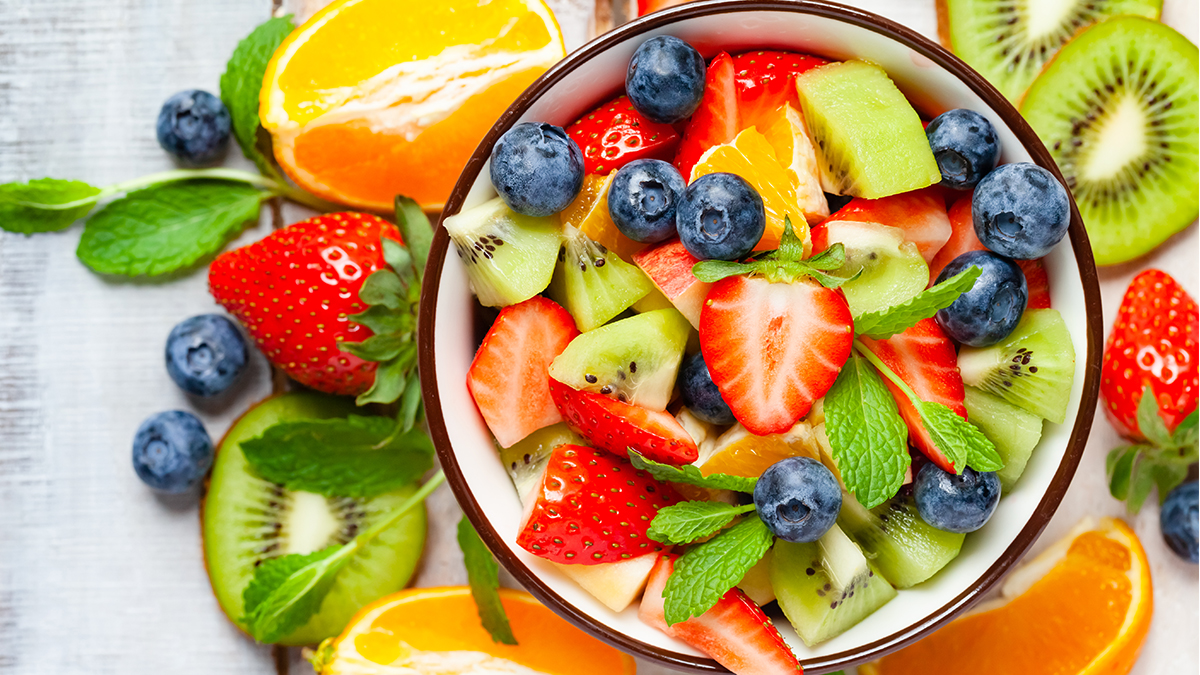  [firstforwomen.com](https://www.firstforwomen.com/weight-loss/nutrition/low-glycemic-fruits)   - **Apples and pears**: Rich in fiber (especially with skin on); studies link them to lower type 2 diabetes risk.   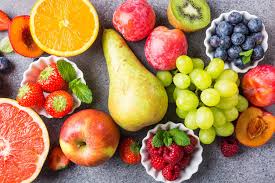  [agamatrix.com](https://agamatrix.com/blog/fruits-diabetes/)  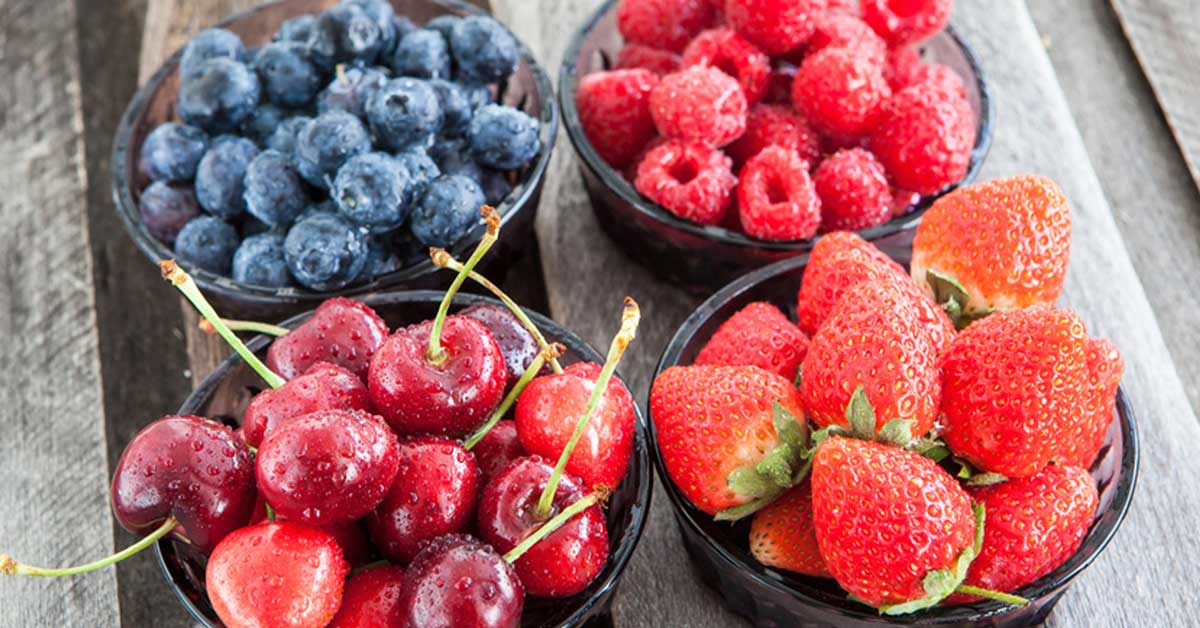  [adrenalfatiguesolution.com](https://adrenalfatiguesolution.com/fruits-lowest-glycemic-load/)   - **Citrus fruits** (oranges, grapefruit, lemons): Low GI, high in vitamin C and folate.   [everydayhealth.com](https://www.everydayhealth.com/type-2-diabetes/best-fruits-for-diabetes/)  8 Fruits That Are Good for People With Diabetes   - **Cherries, peaches, plums, kiwis, and avocados**: Moderate to low GI, with added benefits like healthy fats (in avocados).   **Tips for Enjoying Fruit Safely**   - Choose **whole fruit** over juice, dried fruit, or canned in syrup—these lack fiber and can spike blood sugar faster. - Pair fruit with protein or fat (e.g., berries with nuts) to further stabilize blood sugar. - Monitor portions and your individual response—everyone's body reacts differently, so check blood sugar if possible. - No fruit is completely "off-limits," but higher-GI ones like watermelon, pineapple, or bananas are best in smaller amounts.   Consult a doctor or registered dietitian for personalized advice tailored to your meal plan. Fruit can absolutely fit into a diabetes-friendly lifestyle! |
| B. Optimised additive | “What fruit is safe to eat if you have type 2 diabetes? Explain your answer clearly and briefly indicate the kinds of reliable evidence typically used to support such advice (e.g. dietary guidelines, systematic reviews, or large observational studies).” | Most fruits are safe for people with type 2 diabetes when consumed in moderation, as their natural fiber helps slow the absorption of sugars, preventing sharp blood sugar spikes. Low glycemic index (GI) options are particularly recommended, including berries (such as strawberries, blueberries, raspberries, and blackberries), apples, pears, cherries, oranges, grapefruit, kiwi, peaches, plums, apricots, and avocados. These provide essential nutrients without significantly raising blood glucose levels. Higher GI fruits like bananas, grapes, mangoes, pineapple, and watermelon can still be enjoyed but in smaller portions to avoid blood sugar fluctuations. Aim for whole, fresh fruits over juices or dried varieties, and pair them with protein or fat for better glycemic control.  This advice is supported by dietary guidelines from organizations like the American Diabetes Association, systematic reviews on the effects of berries on insulin resistance and hyperglycemia, and large observational studies linking fruit intake to improved diabetes management. |
| C. Interaction-aware inquiry | “What fruit is safe to eat if you have type 2 diabetes? Explain how the answer depends on different conditions, specifying key modifying factors (e.g. portion size, type of fruit, meal context, medication use), the interaction type (effects differ by condition), and short-term versus longer-term effects. Provide 3–5 ‘it depends’ statements and common oversimplifications to avoid.” | No single fruit is universally "unsafe" for people with **type 2 diabetes**—major health organizations like the American Diabetes Association (ADA), Diabetes UK, and Diabetes Canada agree that whole fruits can and should be part of a balanced diet. Fruits provide essential fiber, vitamins, minerals, antioxidants, and polyphenols that support overall health, reduce inflammation, and may even lower long-term risks associated with diabetes.  The impact on blood glucose varies significantly based on individual factors, making "safety" highly contextual rather than absolute.  **Key Modifying Factors and Interactions**   - **Type of fruit** — Fruits differ in glycemic index (GI, how quickly they raise blood sugar) and glycemic load (GL, combining GI with portion carbs). Low-GI/GL options (e.g., berries, apples, pears, cherries, citrus) cause slower, smaller rises due to higher fiber and water content. Higher-GI examples (e.g., ripe bananas, pineapple, watermelon) can cause faster spikes, though watermelon's low GL often mitigates this in small portions. Interaction: Effects differ by fruit composition—fiber slows absorption, blunting short-term spikes. - **Portion size** — Standard servings (e.g., 1 small apple, 1 cup berries, ½ medium banana) typically contain ~15g carbs, manageable for most. Larger portions increase carb load proportionally. Interaction: Linear dose-response—more carbs mean greater short-term glucose rise. - **Meal context** — Eating fruit alone leads to faster absorption; pairing with protein, healthy fats, or fiber (e.g., apple with nuts) slows digestion and reduces spikes. Interaction: Synergistic—other foods lower overall meal GI. - **Medication use and individual control** — Insulin or meds (e.g., sulfonylureas) require carb counting; better-controlled diabetes or higher activity levels improve tolerance. Interaction: Multiplicative—poor control or insulin resistance amplifies short-term effects. - **Other factors** — Form (whole > dried > juice, as juice lacks fiber and spikes faster); ripeness (riper = higher GI); personal response (varies due to gut microbiome, stress, etc.).   **Short-Term vs. Longer-Term Effects**   - **Short-term** (hours after eating) → Primarily post-meal blood glucose spikes, influenced heavily by GI/GL, portion, and context. Well-managed choices minimize highs/lows. - **Longer-term** (weeks/months) → Focus on overall diet quality—A1c improvement, weight management, cardiovascular protection from fiber/antioxidants. Regular moderate fruit intake associates with better glycemic control and lower type 2 diabetes progression risk.   **3–5 ‘It Depends’ Statements**   1. **It depends on portion size** — A small handful of berries (low GL) may cause negligible short-term rise, while a large bowl could meaningfully elevate glucose; long-term, controlled portions support stable A1c without deprivation. 2. **It depends on the type and form of fruit** — Low-GI whole fruits like strawberries interact favorably with fiber to minimize short-term spikes, whereas fruit juice (high GI, no fiber) causes rapid rises and offers fewer long-term nutrient benefits. 3. **It depends on meal context** — Eating a pear alone may produce a quicker short-term glucose bump than pairing it with cheese or almonds, which blunts the response and enhances satiety for better long-term adherence. 4. **It depends on your medications and current control** — On insulin, precise carb matching prevents short-term highs/lows; with good control, higher-GL fruits tolerate better long-term without A1c impact. 5. **It depends on individual monitoring** — Personal blood sugar response varies—some tolerate bananas well, others see spikes—making self-testing key for short-term safety and long-term personalization.   **Common Oversimplifications to Avoid**   - "All fruit is off-limits because it contains sugar" → Ignores fiber's protective role and evidence showing whole fruit benefits diabetes management. - "Certain fruits like bananas, grapes, or watermelon are always bad" → Overlooks portion, context, and low-GL realities; no fruit bans in guidelines. - "Natural fruit sugar doesn't affect blood sugar like added sugar" → Both count as carbs and impact glucose short-term. - "You can eat unlimited low-GI fruits without issue" → Portions still matter for total carb intake and long-term control. |
| Scenario 4 (Lay) Diabetes medication and weight gain in type 2 diabetes *Mediation* | A. Baseline additive | “Why do some type 2 diabetes medicines cause weight gain?” | Some **type 2 diabetes medications** cause **weight gain** primarily because they improve blood sugar control in ways that promote calorie retention, increase insulin levels (which is anabolic), or lead to fluid retention and fat redistribution. The main classes associated with weight gain are **insulin**, **sulfonylureas** (e.g., glipizide, glyburide), **thiazolidinediones (TZDs)** (e.g., pioglitazone, rosiglitazone), and sometimes **meglitinides**.  **Insulin**  Insulin therapy often leads to weight gain (typically 4–11 pounds or more in the first year for type 2 diabetes patients). Key mechanisms include:   - Reduced **glycosuria** (glucose loss in urine): Better glycemic control means previously wasted calories from high blood sugar are now absorbed and stored. - **Anabolic effects**: Insulin promotes fat storage and muscle growth. - Increased appetite or "defensive eating" to avoid hypoglycemia.   **Sulfonylureas (and Meglitinides)**  These stimulate the pancreas to release more insulin, leading to modest weight gain (often 2–6 pounds). Mechanisms mirror insulin's: higher insulin levels drive calorie storage, reduced glycosuria, and potential increased appetite from blood sugar fluctuations or hypoglycemia risk.  **Thiazolidinediones (TZDs)**  TZDs cause weight gain (typically 4–11 pounds over months to years) through:   - **Fluid retention** (edema): They affect kidney sodium reabsorption, increasing plasma volume. - **Fat redistribution**: Shift from harmful visceral fat to subcutaneous fat, plus overall increase in adipose tissue. - Improved glycemic control contributing to calorie retention.   Not all type 2 diabetes medications cause weight gain—some are weight-neutral (e.g., metformin, DPP-4 inhibitors) or promote weight loss (e.g., GLP-1 receptor agonists like semaglutide, SGLT2 inhibitors). Doctors often prioritize weight-friendly options when possible, especially since excess weight can worsen insulin resistance. Lifestyle changes (diet, exercise) can help mitigate gain from these drugs. Consult your healthcare provider for personalized advice. |
| B. Optimised additive | “Why do some type 2 diabetes medicines cause weight gain? Explain the main mechanisms involved and briefly indicate the kinds of reliable evidence typically used to support such explanations (e.g. clinical guidelines, systematic reviews, or large observational studies).” | Some type 2 diabetes medications, including insulin, sulfonylureas (e.g., glipizide, glimepiride), thiazolidinediones (TZDs, e.g., pioglitazone, rosiglitazone), and meglitinides (e.g., repaglinide, nateglinide), are associated with weight gain, typically ranging from 1-9 kg in the first year of use, depending on the drug and individual factors. This occurs because these drugs improve glycemic control but can shift the body's energy balance toward storage and retention.  The main mechanisms involved include:   - **Reduction in glycosuria and calorie loss**: High blood glucose leads to glucose excretion in urine (glycosuria), which results in calorie loss and a negative energy balance. By lowering blood glucose, these medications (especially insulin and sulfonylureas) reduce this urinary calorie loss, leading to retention of energy that would otherwise be excreted. - **Anabolic effects of increased insulin**: Insulin and insulin secretagogues (sulfonylureas and meglitinides) elevate insulin levels, which promote fat and protein synthesis while inhibiting lipolysis (fat breakdown) and proteolysis (protein breakdown). This anabolic shift encourages fat storage and overall weight gain, often as adipose tissue. - **Defensive eating due to hypoglycemia risk**: Sulfonylureas, meglitinides, and insulin can cause low blood glucose episodes, prompting patients to consume extra calories (e.g., snacking) to prevent or treat hypoglycemia, contributing to net weight gain. - **Fluid retention and edema (specific to TZDs)**: TZDs improve insulin sensitivity but can cause sodium and fluid retention through effects on renal sodium excretion, intestinal ion transport, and increased vascular permeability (e.g., via VEGF production), leading to weight gain from edema rather than just fat. - **Catch-up weight and central appetite effects**: Better glycemic control can reverse prior weight loss from uncontrolled diabetes, allowing "catch-up" gain. Insulin may also influence central nervous system pathways regulating appetite and energy expenditure.   These explanations are typically supported by reliable evidence such as randomized controlled trials (e.g., PROactive for pioglitazone, DREAM for rosiglitazone), systematic reviews and meta-analyses synthesizing trial data on weight outcomes, large observational studies tracking real-world patient cohorts, and clinical guidelines from organizations like the American Diabetes Association (ADA) or National Institute for Health and Care Excellence (NICE), which incorporate these sources to recommend weight-neutral alternatives when possible. |
| C. Interaction-aware inquiry | “Why do some type 2 diabetes medicines cause weight gain? Explain this relationship by explicitly describing mediating processes, specifying the interaction type (mediation) and temporal pattern (early vs longer-term effects). Provide a step-by-step pathway explanation and explain common oversimplifications to avoid.” | **Sulfonylureas (e.g., Glipizide, Glimepiride, Glyburide)**  Sulfonylureas are oral antidiabetic agents that primarily stimulate insulin secretion from pancreatic beta cells, leading to weight gain in many patients with type 2 diabetes. The average weight gain is approximately 2-2.3 kg over several months to years, though it varies by specific agent (e.g., glyburide tends to cause more gain due to higher hypoglycemia risk). This relationship is mediated by hyperinsulinemia and its downstream effects, with the interaction type being mediation: the drug induces increased insulin as an intermediate step, which then drives weight gain through multiple pathways.  **Step-by-Step Pathway Explanation**   1. Sulfonylureas bind to the sulfonylurea receptor (SUR1) subunit of ATP-sensitive potassium (KATP) channels on pancreatic beta-cell membranes. 2. This binding inhibits KATP channel activity, reducing potassium efflux and causing membrane depolarization. 3. Depolarization opens voltage-dependent calcium channels (VDCCs), leading to calcium influx into the beta cell. 4. Elevated intracellular calcium triggers the exocytosis of insulin granules, resulting in increased insulin secretion (hyperinsulinemia), independent of blood glucose levels. 5. Hyperinsulinemia improves glycemic control, reducing hyperglycemia and thus decreasing urinary glucose excretion (glycosuria). This retains calories that would otherwise be lost in urine, promoting positive energy balance. 6. Insulin's anabolic effects directly stimulate lipogenesis (fat synthesis) in adipocytes and muscle, inhibit lipolysis (fat breakdown), and enhance protein synthesis, shifting energy storage toward fat accumulation. 7. Additionally, the risk of hypoglycemia from non-glucose-dependent insulin release prompts "defensive snacking" (increased calorie intake to prevent or treat lows), further contributing to energy surplus.   **Temporal Pattern**   - **Early effects (first few weeks to months):** Weight gain is predominantly mediated by rapid improvements in glycemic control, which reduce glycosuria and calorie loss. Hypoglycemia-related snacking may also begin early if doses are not titrated carefully. - **Longer-term effects (months to years):** Ongoing anabolic actions of insulin and persistent snacking due to recurrent hypoglycemia risks sustain weight gain, even as glycemic benefits plateau. This can lead to a cumulative increase, with diminished drug efficacy over time exacerbating the cycle.   **Common Oversimplifications to Avoid**  It is often oversimplified that weight gain from sulfonylureas is solely due to hypoglycemia-induced snacking, ignoring the primary role of reduced glycosuria and insulin's direct anabolic effects. Another common error is assuming all sulfonylureas cause equivalent gain; in reality, agents like glyburide have higher hypoglycemia risk and thus more gain, while glimepiride is relatively weight-neutral due to lower hypo incidence. Additionally, portraying this as inevitable overlooks that combining with weight-neutral agents like metformin can mitigate it.  **Thiazolidinediones (TZDs; e.g., Pioglitazone, Rosiglitazone)**  TZDs are insulin sensitizers that activate peroxisome proliferator-activated receptor gamma (PPAR-γ), leading to weight gain of 2.3-4.25 kg on average, often correlating with better glycemic response. The mediation involves PPAR-γ-driven changes in adipose tissue and fluid homeostasis, where the drug alters gene expression as the mediator, indirectly causing weight gain despite improved insulin sensitivity.  **Step-by-Step Pathway Explanation**   1. TZDs bind to and activate PPAR-γ, a nuclear receptor highly expressed in adipocytes. 2. Activation upregulates genes involved in adipocyte differentiation, lipid metabolism, and insulin signaling (e.g., increased GLUT4 expression for glucose uptake). 3. This promotes preadipocyte differentiation into small, insulin-sensitive adipocytes, redistributing fat from visceral (abdominal) depots to subcutaneous (peripheral) ones, which are less metabolically harmful. 4. Improved peripheral insulin sensitivity enhances glucose utilization in tissues, reducing hyperglycemia and indirectly decreasing glycosuria, though this is secondary to sensitization. 5. Simultaneously, PPAR-γ activation in renal collecting ducts increases epithelial sodium channel (ENaC) expression, reducing sodium excretion and promoting fluid retention. 6. TZDs also elevate vascular endothelial growth factor (VEGF), increasing microvascular permeability and leading to edema. 7. The net result is increased adipose mass (via redistribution and lipogenesis) and fluid volume, manifesting as weight gain.   **Temporal Pattern**   - **Early effects (weeks to a few months):** Fluid retention and edema predominate, often appearing within the first 1-3 months as sodium reabsorption and vascular changes take effect quickly. - **Longer-term effects (months to years):** Adipose tissue redistribution and expansion become more prominent, leading to sustained weight gain. Studies show progressive increases over 3-4 years, with greater gain in responders achieving better glycemic control.   **Common Oversimplifications to Avoid**  A frequent oversimplification is attributing all TZD-related weight gain to harmful fat accumulation, disregarding that it often involves beneficial subcutaneous fat shifts that improve insulin sensitivity and reduce visceral fat risks. Another is ignoring that fluid retention (not just fat) drives much of the early gain, which can be managed with diuretics. Finally, assuming weight gain negates benefits overlooks evidence that it correlates with metabolic improvements.  **Insulin Therapy**  Exogenous insulin is a cornerstone for advanced type 2 diabetes but commonly causes weight gain of 3-9 kg in the first year, more than with oral agents. Mediation occurs via direct hyperinsulinemia, where injected insulin acts as the mediator, amplifying anabolic processes and altering energy balance.  **Step-by-Step Pathway Explanation**   1. Exogenous insulin is administered, directly elevating circulating insulin levels (hyperinsulinemia). 2. Insulin binds to receptors on target tissues (e.g., muscle, liver, adipocytes), activating the PI3K/AKT pathway for glucose uptake and metabolism. 3. This rapidly lowers blood glucose, reducing hyperglycemia and eliminating glycosuria, thereby conserving calories (up to 100-300 g of glucose/day previously lost). 4. Insulin's anabolic effects stimulate lipogenesis and glycogen synthesis while inhibiting lipolysis and proteolysis, promoting fat and lean mass storage. 5. In insulin-resistant states, higher doses exacerbate hyperinsulinemia, further driving de novo lipogenesis (fat synthesis from glucose) in adipocytes. 6. Hypoglycemia risk (especially with human insulins) leads to defensive snacking and increased calorie intake. 7. Over time, this creates a positive energy balance, with fat accumulation worsening insulin resistance in a feedback loop.   **Temporal Pattern**   - **Early effects (first 6 months):** Weight gain is largely mediated by glycemic improvements, with reduced glycosuria accounting for most of the initial 2-4 kg. Hypoglycemia-related snacking may contribute if doses are high. - **Longer-term effects (beyond 6 months):** Anabolic effects of insulin become dominant, independent of further glycemic changes, leading to continued gain (e.g., +2.8 kg over 12 months in studies). Basal analogs like detemir may cause less long-term gain due to flatter profiles and lower hypo risk.   **Common Oversimplifications to Avoid**  Weight gain is often simplistically blamed on hypoglycemia alone, underestimating the calorie retention from reduced glycosuria (which can equal hundreds of daily calories) and insulin's direct promotion of fat storage. Another error is assuming all insulins cause identical gain; analogs like detemir are less prone due to reduced hypo. Finally, viewing gain as purely negative ignores that it partly reflects restored anabolic balance in previously catabolic states. |
